# Supplementary material for: Solvent-free and room temperature visible light-induced C–H activation: CdS as a highly efficient photo-induced reusable nano-catalyst for the C–H functionalization cyclization of t-amines and C–C double and triple bonds
Source: Royal Society of Chemistry journal article supplement (doi:10.1039/c8gc03297a), 2018-01-01
Supplement: c8gc03297a1.pdf [file c8gc03297a1.pdf]

## Supporting information

### Solvent-Free and Room Temperature Visible Light-Induced C-H Activation: CdS as a Highly Efficient Photo-Induced Reusable Nano-Catalyst for the C-H Functionalization Cyclization of *t*-Amines and C-C Double and Triple bonds

Somayeh Firoozi,<sup>a</sup> Mona Hosseini-Sarvari\*<sup>a</sup> and Mehdi Koohgard<sup>a</sup>

<sup>a</sup> Department of Chemistry, Shiraz University, Shiraz 7194684795, I.R. Iran

\* Corresponding author, E-mail address: Hossaini@shirazu.ac.ir

#### Contents

|                                                                                                                          |     |
|--------------------------------------------------------------------------------------------------------------------------|-----|
| 1. Tests for finding the suitable catalyst for the synthesis of Pyrrolo[3,4- <i>c</i> ]quinolones .....                  | S2  |
| 2. Tests for finding the suitable catalyst for the synthesis of pyrrolo[2,1- <i>a</i> ]isoquinoline-8-carboxylates ..... | S2  |
| 3. Experimental for the synthesis of maleimides .....                                                                    | S4  |
| 3.1. General procedure for the synthesis of <i>N</i> -aryl maleimides .....                                              | S4  |
| 3.2. General procedure for the synthesis of <i>N</i> -alkyl maleimides .....                                             | S4  |
| 4. Indication of H <sub>2</sub> O <sub>2</sub> after completing the reaction .....                                       | S4  |
| 5. Characterization of compounds .....                                                                                   | S5  |
| 6. <sup>1</sup> HNMR and <sup>13</sup> CNMR spectra of products .....                                                    | S11 |
| 7. References .....                                                                                                      | S52 |

## 1. Tests for finding the suitable catalyst for the synthesis of Pyrrolo[3,4-c]quinolones

At the first, a model reaction was selected in the presence of several photocatalysts in acetonitrile as solvent and under white light radiation for 24 h at atmosphere (Table S1). The main goal of present work was using ZnO or TiO<sub>2</sub> as photocatalyst but since ZnO and TiO<sub>2</sub> have no absorption in visible region, we decided to apply doped ZnO and TiO<sub>2</sub> on graphene to reduce band gap and increase light adsorption capacity in visible region; but unfortunately, the efficiency of this model was not significant. Therefore, to enhance the photocatalytic activity, CdS was added to dope ZnO on graphene (RGO-ZnO). So, the reaction efficiency was notably increased by finding CdS/ZnO-RGO.

To figure out the effect of CdS/ZnO-RGO composite, CdS-RGO and CdS nano-photocatalysts were synthesized and were used in this reaction and interestingly the same results were observed for all. Herein, we found that an efficiency increment was observed just from CdS and there is no striking difference between using either CdS/ZnO-RGO, CdS-RGO or CdS. As a result, CdS has been applied as a photocatalyst for this process. And also applied Ag/ZnO-RGO as photo catalyst but the reaction efficiency did not change.

**Table S1.** The effect of various Nano photo-catalyst in the synthesis of pyrrolo[3,4-c]quinolones.

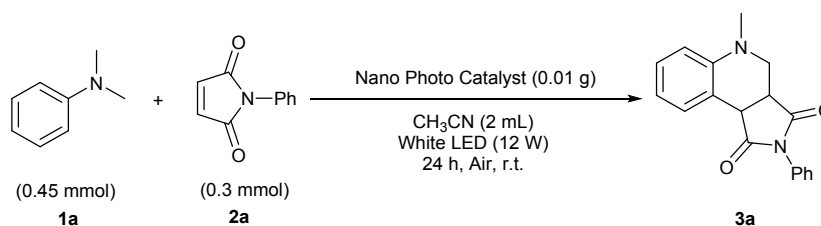

| Entry | Nano Photo Catalyst     | Yield (%) |
|-------|-------------------------|-----------|
| 1     | Non Nano photo catalyst | -         |
| 2     | GO                      | 5         |
| 3     | ZnO                     | 20        |
| 4     | TiO <sub>2</sub>        | 20        |
| 5     | ZnO-RGO                 | 50        |
| 6     | TiO <sub>2</sub> -RGO   | 50        |
| 7     | CdS/ZnO-RGO             | 92        |
| 8     | CdS-RGO                 | 92        |
| 9     | CdS                     | 91        |
| 10    | Ag/ZnO-RGO              | 20        |

## 2. Tests for finding the suitable catalyst for the synthesis of pyrrolo[2,1-a]isoquinoline-8-carboxylates

To achieve the best results, The condensation reaction between ethyl 2-(3,4-dihydroisoquinolin-2(1H)-yl)acetate (**4a**) and *N*-phenylmaleimide (**2a**) was chosen as a model reaction for the synthesis of ethyl 9,11-dioxo-10-phenyl-5,9,10,11-tetrahydro-6H-pyrrolo[3',4':3,4]pyrrolo[2,1-a]isoquinoline-8-carboxylate (**5a**). Various reaction conditions were optimized, and this affordable pathway was progressed in the presence of 10 mol% of CdS NPs under sun light or blue light irradiation and air atmosphere, in solvent-free conditions at room temperature. According to Table S2 and S3, various solvents, catalyst quantities different wavelength of irradiation produced from distinct resources as well as different atmospheres were tested. A batch of solvents including H<sub>2</sub>O, EtOH, CH<sub>3</sub>CN, EtOAc, acetone, CHCl<sub>3</sub>, CH<sub>2</sub>Cl<sub>2</sub>, THF, DMF and DMSO in the presence of CdS NPs and under white light as well as solvent-free conditions were checked out. As it can be surveyed in Table S2, the best results have been obtained in solvent-free conditions.

**Table S2:** The effect of various solvents and different quantities of ethyl 2-(3,4-dihydroisoquinolin-2(1H)-yl)acetate as a precursor in the synthesis ethyl 9,11-dioxo-10-phenyl-5,9,10,11-tetrahydro-6H-pyrrolo[3',4':3,4]pyrrolo[2,1-a]isoquinoline-8-carboxylate.

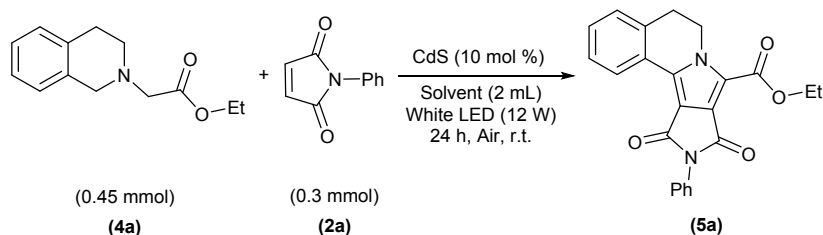

| Entry | Solvent          | Yield (%)          |
|-------|------------------|--------------------|
| 1     | H <sub>2</sub> O | Trace <sup>a</sup> |

|    |                                 |                 |
|----|---------------------------------|-----------------|
| 2  | EtOH                            | 51 <sup>a</sup> |
| 3  | CH <sub>3</sub> CN              | 88 <sup>a</sup> |
| 4  | EtOAc                           | 55 <sup>a</sup> |
| 5  | Acetone                         | 60 <sup>a</sup> |
| 6  | CH <sub>2</sub> Cl <sub>2</sub> | 78 <sup>a</sup> |
| 7  | CHCl <sub>3</sub>               | 75 <sup>a</sup> |
| 8  | THF                             | 32 <sup>a</sup> |
| 9  | DMSO                            | 86 <sup>a</sup> |
| 10 | DMF                             | 80 <sup>a</sup> |
| 11 | Solvent-Free                    | 84 <sup>b</sup> |
| 12 | Solvent-Free                    | 88 <sup>c</sup> |
| 13 | Solvent-Free                    | 90 <sup>a</sup> |
| 14 | Solvent-Free                    | 90 <sup>d</sup> |

The condensation reaction of ethyl 2-(3,4-dihydroisoquinolin-2(1*H*)-yl)acetate (1-2 eq), *N*-phenylmaleimide (0.3 mmol), CdS as nano photo catalyst (10 mol %) and solvent (2 mL) under irradiation white LED 12 W lamp for 24 h at room temperature in the air. <sup>a</sup> ethyl 2-(3,4-dihydroisoquinolin-2(1*H*)-yl)acetate 1.5 eq (0.45 mmol), <sup>b</sup> ethyl 2-(3,4-dihydroisoquinolin-2(1*H*)-yl)acetate 1 eq (0.3 mmol), <sup>c</sup> ethyl 2-(3,4-dihydroisoquinolin-2(1*H*)-yl)acetate 1.2 eq (0.36 mmol) and <sup>d</sup> ethyl 2-(3,4-dihydroisoquinolin-2(1*H*)-yl)acetate 2 eq (0.6 mmol).

After finding the solvent-free conditions, diverse amounts of catalyst were tested. The efficiency in catalyst amounts less than 10 mol% was negligible and all amounts more than which showed no increasing in efficiency or reduction in reaction time were observed. The absence of CdS NPs (Table S3, Entry 1) as a photo-catalyst, the reaction is not performed. Effects of light irradiation and different atmospheres were also studied and it was observed that the reaction did not progress in the absence of light (Table 1, Entry 7). This phenomena exhibits that CdS photocatalyst exciting by light radiation. The efficiency slaked using red and green lights, while the same benign efficiency was found for white (Table 1, Entry 3, 11) and blue (Table 1, Entry 8, 12) lights. However, the reaction time reduced from 24 h to 18 h with blue light irradiation. On the other hand, the reaction time decreased to 8 h with Sun light irradiation (Table S3, Entry 15). The same data were obtained for oxygen and air atmosphere but there was no noticeable result under argon atmosphere. So, the air atmosphere was selected as the best conditions.

Therefore, The best reaction conditions were obtained with CdS (10 mol%) as a photocatalyst under the sun light or a blue LED lamp irradiation without any solvent at room temperature and air atmosphere. for the synthesis of different pyrrolo[2,1-*a*]isoquinoline-8-carboxylate derivatives.

**Table S3:** The optimization of model reaction based on diverse amounts of photocatalyst, wavelengths of light, and atmosphere (gas).

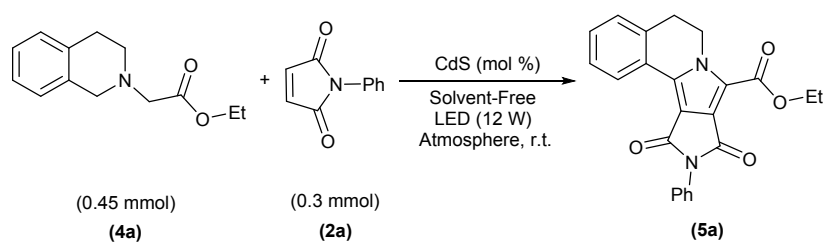

| Entry | CdS Amount (mol %) | Light | Atmosphere     | Yield (%)         |
|-------|--------------------|-------|----------------|-------------------|
| 1     | Catalyst Free      | White | Air            | -                 |
| 2     | 5                  | White | Air            | 78                |
| 3     | 10                 | White | Air            | 90 <sup>a</sup>   |
| 4     | 15                 | White | Air            | 91                |
| 5     | 20                 | White | Air            | 90                |
| 6     | 25                 | White | Air            | 90                |
| 7     | 10                 | Dark  | Air            | -                 |
| 8     | 10                 | Blue  | Air            | 90 <sup>b</sup>   |
| 9     | 10                 | Green | Air            | 44                |
| 10    | 10                 | Red   | Air            | 35                |
| 11    | 10                 | White | O <sub>2</sub> | 90 <sup>a,c</sup> |
| 12    | 10                 | Blue  | O <sub>2</sub> | 90 <sup>b,c</sup> |
| 13    | 10                 | White | Ar             | - <sup>d</sup>    |

|    |    |      |     |                 |
|----|----|------|-----|-----------------|
| 14 | 10 | Blue | Ar  | - <sup>d</sup>  |
| 15 | 10 | Sun  | Air | 90 <sup>e</sup> |

The condensation reaction of *N*-phenylmaleimide (0.3 mmol), ethyl 2-(3,4-dihydroisoquinolin-2(1*H*)-yl)acetate (0.45 mmol) and different amount CdS as Nano Photo catalyst (mol %) under different irradiation LED 12 W lamp and solvent-free condition for 24 h at room temperature in the Atmosphere. <sup>a</sup> The completion time of reaction is 24 h, <sup>b</sup> The completion time of reaction is 18 h, <sup>c</sup> oxygen balloon, <sup>d</sup> Argon balloon and <sup>e</sup> The completion time of reaction is 12 h.

### 3. Experimental for the synthesis of maleimides

*N*-aryl maleimides and *N*-alkyl maleimides were synthesized respectively, according to the modified previous reported procedures [1,2].

#### 3.1. General procedure for the synthesis of *N*-aryl maleimides

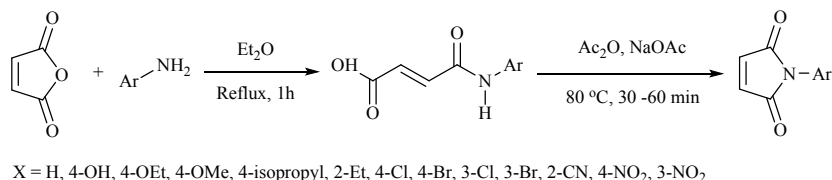

Maleic anhydride (5 mmol) dissolved in diethyl ether (10 mL) and aryl anilin (5 mmol) was dissolved in diethyl ether (5 mL) separately, then aryl anilin solution in diethyl ether drop and drop added to the flask containing the Maleic anhydride solution in diethyl ether and stirred for 1h under reflux. Next, the reaction mixture was cooled to the room temperature, was filtered off and washed with diethyl ether. To the 4-oxo-4-(arylamino)but-2-enoic acid is obtained in step 1, added Acetic anhydride (2mL) and anhydrous sodium acetate (2 mmol) and stirred at 80 °C for 30-60 min. Then the reaction mixture was cooled to the room temperature and added into ice. The product washed with cold water. The *N*-aryl maleimides dried and recrystallized from petroleum ether to obtain pure product.

#### 3.2. General procedure for the synthesis of *N*-alkyl maleimides

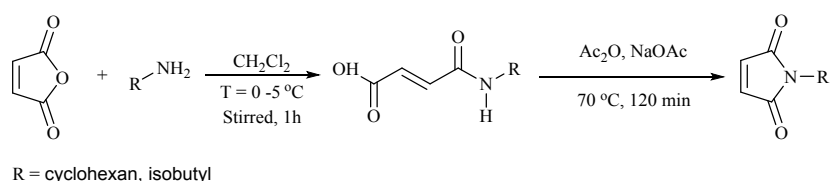

Maleic anhydride (5 mmol) dissolved in dichloromethane (10 mL) and alkyl anilin (5 mmol) was dissolved in dichloromethane (5 mL) separately, then alkyl anilin solution in dichloromethane drop and drop added to the flask containing the Maleic anhydride solution in dichloromethane at 0-5 °C temperature. After that stirred for 1h at room temperature. Next, the reaction mixture was filtered off and washed with dichloromethane. To the 4-oxo-4-(alkylamino)but-2-enoic acid is obtained in step 1, added Acetic anhydride (2mL) and anhydrous sodium acetate (2 mmol) and stirred at 70 °C for 120 min. Then the reaction mixture was cooled to the room temperature and added into ice. The product washed with cold water. The *N*-alkyl maleimides dried and obtained crude products were purified by column chromatography to afford pure *N*-alkyl maleimides products.

### 4. Indication of H<sub>2</sub>O<sub>2</sub> after completing the reaction

For the synthesis of 5-methyl-2-phenyl-3*a*,4,5,9*b*-tetrahydro-1*H*-pyrrolo[3,4-*c*]quinoline-1,3(2*H*)-dione (**3a**), according to optimize conditions, was carried out the reaction of between *N,N*-dimethylaniline (0.45 mmol) and *N*-phenylmaleimide (0.3 mmol) in the presence of CdS NPs (10 mol%) under irradiation of a blue LED 12 W lamp and solvent-free condition for 24 h at room temperature under the air atmosphere, to confirm the formation of H<sub>2</sub>O<sub>2</sub> during the reaction, the <sup>1</sup>H NMR spectrum was taken from the reaction mixture (Scheme 3, C). The H<sub>2</sub>O<sub>2</sub> representative peak was detected in <sup>1</sup>H NMR spectrum at δ= 9.63 ppm.

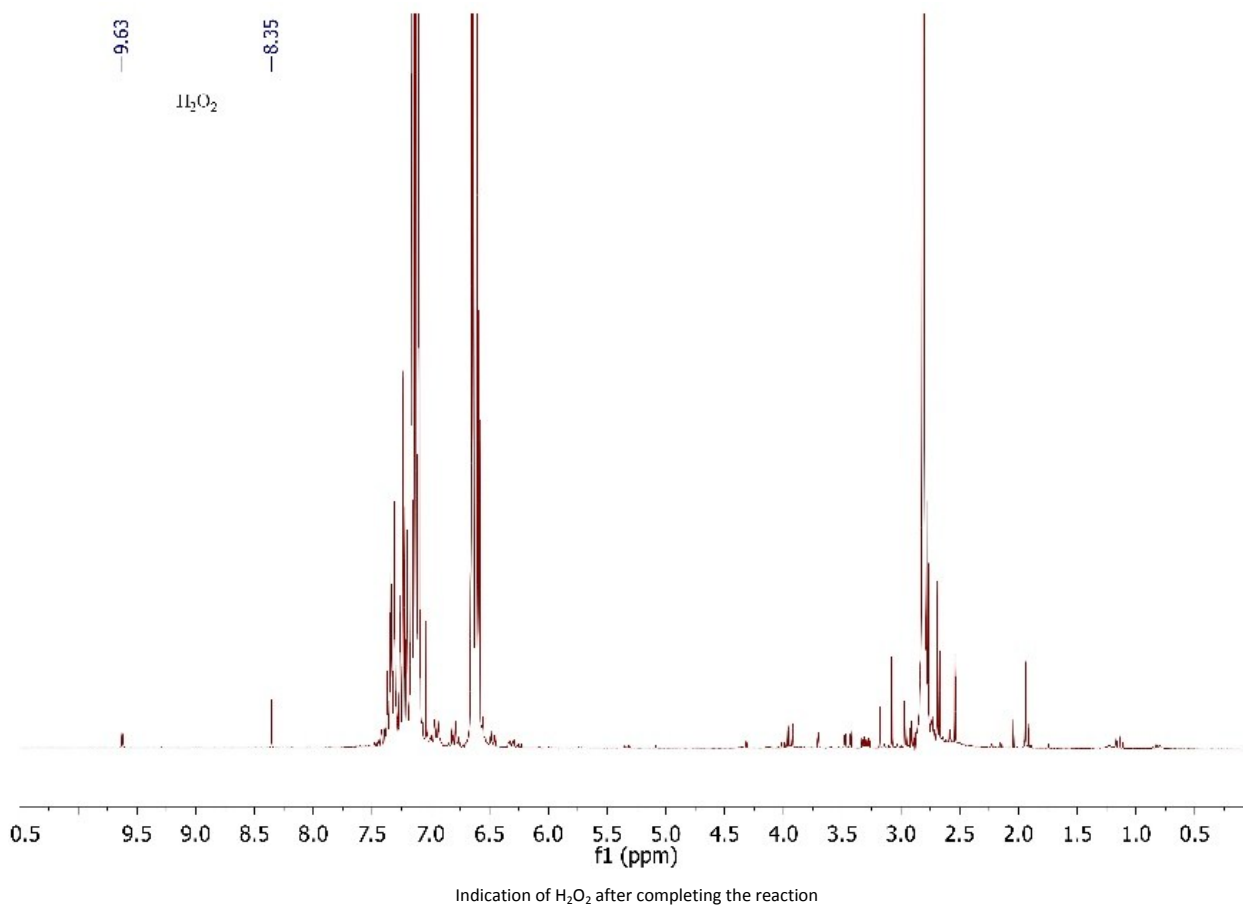

## 5. Characterization of compounds

### 5-Methyl-2-phenyl-3a,4,5,9b-tetrahydro-1*H*-pyrrolo[3,4-*c*]quinoline-1,3(2*H*)-dione (**3a**)

White solid, mp = 203-205 °C (202-204 °C)<sup>3</sup>. IR (KBr)  $\nu_{\max}$  2925, 1790, 1715, 1593, 1497, 1390, 1325, 1120, 765, 692 cm<sup>-1</sup>. <sup>1</sup>HNMR (250 MHz, CDCl<sub>3</sub>)  $\delta$ (ppm); 2.80 (s, 3H), 3.08 (dd, 1H, *J* = 7.2, 5.0 Hz), 3.48-3.60 (m, 2H), 4.12 (d, 1H, *J* = 7.5), 6.70 (d, 1H, *J* = 7.5 Hz), 6.87 (t, 1H, *J* = 7.5 Hz), 7.17-7.51 (m, 7H). <sup>13</sup>CNMR (100 MHz, CDCl<sub>3</sub>)  $\delta$ (ppm); 39.55, 42.09, 43.46, 50.64, 112.70, 118.60, 119.85, 126.35, 128.53, 128.71, 129.01, 130.35, 131.95, 148.30, 175.72, 177.64. Anal. Calcd for C<sub>18</sub>H<sub>16</sub>N<sub>2</sub>O<sub>2</sub>: C 73.95, H 5.52, N 9.58. Found: C 73.89, H 5.57, N 9.60.

### 2-(4-Hydroxyphenyl)-5-methyl-3a,4,5,9b-tetrahydro-1*H*-pyrrolo[3,4-*c*]quinoline-1,3(2*H*)-dione (**3b**)

White solid, mp = 147-149 °C (146-148 °C)<sup>3</sup>. IR (KBr)  $\nu_{\max}$  3480, 2899, 1768, 1715, 1494, 1375, 1170, 1013, 750 cm<sup>-1</sup>. <sup>1</sup>HNMR (250 MHz, CDCl<sub>3</sub>)  $\delta$  (ppm) 2.78 (s, 3H), 3.07 (dd, 1H, *J* = 7.5, 5.0 Hz), 3.47-3.59 (m, 2H), 4.11 (d, 1H, *J* = 10 Hz), 6.70 (d, 1H, *J* = 10 Hz), 6.86 (td, 1H, *J* = 7.5, 1.0 Hz), 7.10 (d, 2H, *J* = 10 Hz), 7.19-7.22 (m, 1H), 7.26 (d, 2H, *J* = 10.0 Hz), 7.47 (d, 1H, *J* = 7.5 Hz). <sup>13</sup>CNMR (100 MHz, CDCl<sub>3</sub>)  $\delta$  (ppm) 39.48, 42.14, 43.62, 50.68, 112.61, 118.50, 119.75, 122.17, 127.37, 128.78, 129.42, 130.36, 148.56, 150.28, 175.70, 177.61. Anal. Calcd for C<sub>18</sub>H<sub>16</sub>N<sub>2</sub>O<sub>3</sub>: C 70.12, H 5.23, N 9.09. Found: C 70.14, H 5.20, N 9.10.

### 2-(4-Ethoxyphenyl)-5-methyl-3a,4,5,9b-tetrahydro-1*H*-pyrrolo[3,4-*c*]quinoline-1,3(2*H*)-dione (**3c**)

White solid, mp = 152-154 °C (151-153 °C)<sup>3</sup>. IR (KBr)  $\nu_{\max}$  2936, 1770, 1717, 1594, 1513, 1394, 1251, 1205, 1167, 815, 749 cm<sup>-1</sup>. <sup>1</sup>HNMR (250 MHz, CDCl<sub>3</sub>)  $\delta$ (ppm); 1.39 (t, 3H, *J* = 7.5 Hz), 2.83 (s, 3H), 3.10 (dd, 1H, *J* = 7.5, 5.0 Hz), 3.50 (dd, 1H, *J* = 7.5, 5.0 Hz), 3.59 (dd, 1H, *J* = 7.5, 2.5 Hz), 4.01 (q, 2H, *J* = 7.5 Hz), 4.13 (d, 1H, *J* = 10.0), 6.73 (d, 1H, *J* = 7.5 Hz), 6.87-6.92 (m, 3H), 7.12-7.26 (m, 3H), 7.52 (d, 1H, *J* = 7.5 Hz). <sup>13</sup>CNMR (100 MHz, CDCl<sub>3</sub>)  $\delta$ (ppm); 14.78, 39.48, 42.09, 43.53, 50.70, 63.71, 112.54, 114.83, 118.68, 119.67, 124.48, 127.59, 128.67, 130.37, 148.54, 158.82, 176.07, 178.02. Anal. Calcd for C<sub>20</sub>H<sub>20</sub>N<sub>2</sub>O<sub>3</sub>: C 71.41, H 5.99, N 8.33. Found: C 71.48, H 5.92, N 8.27.

### 2-(4-Methoxyphenyl)-5-methyl-3a,4,5,9b-tetrahydro-1*H*-pyrrolo[3,4-*c*]quinoline-1,3(2*H*)-dione (**3d**)

White solid, mp = 222-225 °C (222-224 °C)<sup>4</sup>. IR (KBr)  $\nu_{\max}$  2935, 1711, 1596, 1514, 1396, 1250, 1162, 763 cm<sup>-1</sup>. <sup>1</sup>H-NMR (250 MHz, CDCl<sub>3</sub>)  $\delta$ (ppm); 2.79 (s, 3H), 3.09 (dd, 1H, *J* = 7.5, 5.0 Hz), 3.45-3.59 (m, 2H), 3.75 (s, 3H), 4.10 (d, 1H, *J* = 10 Hz), 6.72 (d, 1H, *J* = 7.5 Hz), 6.84-6.95 (m, 3H), 7.10-7.22 (m, 3H), 7.48 (d, 1H, *J* = 7.5 Hz). <sup>13</sup>C-NMR (100 MHz, CDCl<sub>3</sub>)  $\delta$ (ppm); 39.48, 42.09, 43.53, 50.71, 55.50, 112.55, 114.33, 118.65, 119.68, 124.66, 127.62, 128.68, 130.37, 148.53, 159.42, 176.05, 178.00. Anal.Calcd for C<sub>19</sub>H<sub>18</sub>N<sub>2</sub>O<sub>3</sub>: C 70.79, H 5.63, N 8.69. Found: C 7.77, H 5.68, N 8.52.

2-(4-Isopropylphenyl)-5-methyl-3a,4,5,9b-tetrahydro-1*H*-pyrrolo[3,4-*c*]quinoline-1,3(2*H*)-dione (**3e**)

White solid, mp = 158-160 °C (157-159 °C)<sup>4</sup>. IR (KBr)  $\nu_{\max}$  2965, 2860, 1711, 1597, 1509, 1384, 1276, 1193, 751 cm<sup>-1</sup>. <sup>1</sup>H-NMR (250 MHz, 298K, CDCl<sub>3</sub>)  $\delta$ (ppm); 1.20 (d, 6H, *J* = 7.5 Hz), 2.80 (s, 3H), 2.83-2.97 (m, 1H), 3.08 (dd, 1H, *J* = 7.5, 5.0 Hz), 3.51-3.60 (m, 2H), 4.11 (d, 1H, *J* = 7.5), 6.71 (d, 1H, *J* = 7.5 Hz), 6.88 (t, 1H, *J* = 7.5 Hz), 7.13-7.27 (m, 5H), 7.50 (d, 1H, *J* = 7.5 Hz). <sup>13</sup>C-NMR (101 MHz, 298K, CDCl<sub>3</sub>)  $\delta$ (ppm); 23.87, 33.88, 39.42, 42.08, 43.50, 50.66, 112.49, 118.64, 119.61, 126.11, 127.06, 128.62, 129.53, 130.33, 148.48, 149.24, 175.91, 177.86. Anal.Calcd for C<sub>21</sub>H<sub>22</sub>N<sub>2</sub>O<sub>2</sub>: C 75.42, H 6.63, N 8.38. Found: C 75.40, H 6.73, N 8.45.

2-(2-Ethylphenyl)-5-methyl-3a,4,5,9b-tetrahydro-1*H*-pyrrolo[3,4-*c*]quinoline-1,3(2*H*)-dione (**3f**)

White solid, mp = 129-131 °C (128-130 °C)<sup>4</sup>. IR (KBr)  $\nu_{\max}$  2965, 2826, 1717, 1592, 1516, 1393, 1210, 759 cm<sup>-1</sup>. <sup>1</sup>H-NMR (250 MHz, CDCl<sub>3</sub>)  $\delta$ (ppm); 0.79 (t, 3H, *J* = 7.5 Hz), 2.49 (q, 2H, *J* = 7.5 Hz), 2.84 (s, 3H), 3.08 (dd, 1H, *J* = 7.5, 5.0 Hz), 3.55-3.65 (m, 2H), 4.15 (d, 1H, *J* = 10.0 Hz), 6.75 (dd, 1H, *J* = 7.5, 2.5 Hz), 6.89 (td, 1H, *J* = 7.5, 2.5 Hz), 7.08 (d, 1H, *J* = 7.5 Hz), 7.19-7.36 (m, 4H), 7.48 (d, 1H, *J* = 7.5 Hz). <sup>13</sup>C-NMR (100 MHz, CDCl<sub>3</sub>)  $\delta$ (ppm); 14.20, 24.21, 39.17, 42.90, 44.44, 50.95, 112.25, 119.75, 126.83, 126.87, 128.19, 128.69, 129.11, 129.62, 129.72, 130.29, 141.90, 148.58, 176.25, 178.30. Anal.Calcd for C<sub>20</sub>H<sub>20</sub>N<sub>2</sub>O<sub>2</sub>: C 74.98, H 6.29, N 8.74. Found: C 75.11, H 6.28, N 8.71.

2-(4-Chlorophenyl)-5-methyl-3a,4,5,9b-tetrahydro-1*H*-pyrrolo[3,4-*c*]quinoline-1,3(2*H*)-dione (**3g**)

White solid, mp = 187-189 °C (188-190 °C)<sup>4</sup>. IR (KBr)  $\nu_{\max}$  2955, 1786, 1714, 1593, 1484, 1398, 1322, 1207, 757 cm<sup>-1</sup>. <sup>1</sup>H-NMR (250 MHz, CDCl<sub>3</sub>)  $\delta$  (ppm) 2.85 (s, 3H), 3.10 (dt, 1H, *J* = 7.5, 2.5 Hz), 3.51-3.65 (m, 2H), 4.16 (d, 1H, *J* = 10.0 Hz), 6.77 (dd, 1H, *J* = 7.5, 2.5 Hz), 6.89-6.96 (m, 1H), 7.22-7.28 (m, 3H), 7.38-7.43 (m, 2H), 7.52 (dd, 1H, *J* = 7.5, 2.0 Hz). <sup>13</sup>C-NMR (100 MHz, CDCl<sub>3</sub>)  $\delta$  (ppm) 39.49, 42.10, 43.57, 50.60, 112.64, 118.38, 119.77, 127.58, 128.77, 129.16, 130.28, 130.42, 134.21, 148.45, 175.52, 177.45. Anal.Calcd for C<sub>18</sub>H<sub>15</sub>ClN<sub>2</sub>O<sub>2</sub>: C 58.24, H 4.07, N 7.55. Found: C 57.98, H 4.14, N 7.68.

2-(4-Bromophenyl)-5-methyl-3a,4,5,9b-tetrahydro-1*H*-pyrrolo[3,4-*c*]quinoline-1,3(2*H*)-dione (**3h**)

White solid, mp = 218-220 °C (217-219 °C)<sup>5</sup>. IR (KBr)  $\nu_{\max}$  2958, 1783, 1714, 1594, 1483, 1397, 1322, 1211, 754 cm<sup>-1</sup>. <sup>1</sup>H-NMR (250 MHz, CDCl<sub>3</sub>)  $\delta$  (ppm) 2.81 (s, 3H), 3.09 (dd, 1H, *J* = 7.5, 5.0 Hz), 3.52-3.61 (m, 2H), 4.13 (d, 1H, *J* = 7.5 Hz), 6.73 (d, 1H, *J* = 7.5 Hz), 6.89 (td, 1H, *J* = 7.5, 1.0 Hz), 7.14-7.25 (m, 3H), 7.51 (t, 3H, *J* = 7.5 Hz). <sup>13</sup>C-NMR (100 MHz, CDCl<sub>3</sub>)  $\delta$  (ppm) 39.48, 42.16, 43.71, 50.56, 112.75, 118.05, 119.88, 121.54, 123.10, 128.94, 129.75, 130.25, 132.16, 148.49, 175.16, 177.09. Anal.Calcd for C<sub>18</sub>H<sub>15</sub>BrN<sub>2</sub>O<sub>2</sub>: C 58.24, H 4.07, N 7.55. Found: C 57.98, H 4.14, N 7.68.

2-(3-Chlorophenyl)-5-methyl-3a,4,5,9b-tetrahydro-1*H*-pyrrolo[3,4-*c*]quinoline-1,3(2*H*)-dione (**3i**)

White solid, mp = 159-161 °C (158-160 °C)<sup>5</sup>. IR (KBr)  $\nu_{\max}$  2841, 1778, 1709, 1589, 1491, 1385, 1187, 789, 739 cm<sup>-1</sup>. <sup>1</sup>H-NMR (250 MHz, CDCl<sub>3</sub>)  $\delta$ (ppm); 2.89 (s, 3H), 3.19 (dd, 1H, *J* = 7.5, 5.0 Hz), 3.57-3.69 (m, 2H), 4.22 (d, 1H, *J* = 10.0 Hz), 6.84 (d, 1H, *J* = 7.5 Hz), 6.99 (t, 1H, *J* = 7.5 Hz), 7.22-7.44 (m, 5H), 7.57 (d, 1H, *J* = 7.5 Hz). <sup>13</sup>C-NMR (100 MHz, CDCl<sub>3</sub>)  $\delta$ (ppm); 39.60, 42.27, 43.77, 50.75, 112.78, 118.45, 119.90, 124.67, 126.74, 128.85, 128.96, 130.09, 130.43, 133.13, 134.66, 148.65, 175.57, 177.50. Anal.Calcd for C<sub>18</sub>H<sub>15</sub>ClN<sub>2</sub>O<sub>2</sub>: C 66.16, H 4.63, N 8.57. Found: C 56.95, H 4.43, N 8.67.

2-(3-Bromophenyl)-5-methyl-3a,4,5,9b-tetrahydro-1*H*-pyrrolo[3,4-*c*]quinoline-1,3(2*H*)-dione (**3j**)

White solid, mp = 164-166 °C (164-166 °C)<sup>6</sup>. IR (KBr)  $\nu_{\max}$  2861, 1775, 1715, 1598, 1492, 1387, 1191, 788, 756 cm<sup>-1</sup>. <sup>1</sup>H-NMR (250 MHz, 298K, CDCl<sub>3</sub>)  $\delta$ (ppm); 2.86 (s, 3H), 3.13 (dd, 1H, *J* = 7.5, 5.0 Hz), 3.52-3.66 (m, 2H), 4.18 (d, 1H, *J* = 10.0), 6.77 (d, 1H, *J* = 7.5 Hz), 6.93 (td, 1H, *J* = 7.5, 2.5 Hz), 7.23-7.35 (m, 3H), 7.49-7.55 (m, 3H). <sup>13</sup>C-NMR (101 MHz, 298K, CDCl<sub>3</sub>)  $\delta$ (ppm); 39.47, 42.09, 43.57, 50.58, 112.67, 118.28, 119.81, 122.38, 124.82, 128.80, 129.37, 130.17, 130.26, 131.59, 133.08, 148.40, 175.34, 177.26. Anal.Calcd for C<sub>18</sub>H<sub>15</sub>BrN<sub>2</sub>O<sub>2</sub>: C 58.24, H 4.07, N 7.55. Found: C 58.45, H 4.23, N 7.61.

2-(5-Methyl-1,3-dioxo-1,3,3a,4,5,9b-hexahydro-2*H*-pyrrolo[3,4-*c*]quinolin-2-yl)benzotrile (**3k**)

White solid, mp = 178-180 °C (177-179 °C)<sup>5</sup>. IR (KBr)  $\nu_{\max}$  2856, 2227, 1722, 1509, 1383, 1189, 762 cm<sup>-1</sup>. <sup>1</sup>H-NMR (250 MHz, CDCl<sub>3</sub>)  $\delta$  (ppm) 2.89 (s, 3H), 3.21 (dd, 1H, *J* = 7.5, 2.5 Hz), 3.62-3.73 (m, 2H), 4.30 (d, 1H, *J* = 10.0 Hz), 6.83 (1H, d, *J* = 7.5 Hz), 6.96 (td, 1H, *J* = 7.5, 2.5 Hz), 7.28 (td, 2H, *J* = 7.5, 2.5 Hz), 7.50-7.56 (m, 2H), 7.67 (t, 1H, *J* = 7.5 Hz), 7.78 (d, 1H, *J* = 7.5 Hz). <sup>13</sup>C-NMR (100 MHz, CDCl<sub>3</sub>)  $\delta$  (ppm) 39.47, 42.61, 44.09, 50.79, 112.74, 119.82, 119.86, 119.88, 128.95, 129.20, 129.22, 129.56, 130.34, 130.37, 133.61, 133.68, 148.67, 174.87, 176.74. Anal.Calcd for C<sub>19</sub>H<sub>15</sub>N<sub>3</sub>O<sub>2</sub>: C 71.91, H 4.76, N 13.24. Found: C 71.93, H 4.81, N 13.30.

5-Methyl-2-(4-nitrophenyl)-3a,4,5,9b-tetrahydro-1H-pyrrolo[3,4-c]quinoline-1,3(2H)-dione (**3l**)

Yellow solid, mp = 139-141 °C (138-140 °C)<sup>5</sup>. IR (KBr)  $\nu_{\max}$  2923, 1782, 1713, 1596, 1527, 1342, 1180, 765 cm<sup>-1</sup>. <sup>1</sup>HNMR (250 MHz, CDCl<sub>3</sub>)  $\delta$  (ppm) 2.83 (s, 3H), 3.13 (dd, 1H, *J* = 7.5, 5.0 Hz), 3.55-3.65 (m, 2H), 4.20 (d, 1H, *J* = 7.5 Hz), 6.76 (d, 1H, *J* = 7.5 Hz), 6.92 (td, 1H, *J* = 7.5, 1.0 Hz), 7.24 (td, 1H, *J* = 7.5, 1.0 Hz), 7.49-7.59 (m, 3H), 8.27 (dd, 2H, *J* = 7.5, 2.5 Hz). <sup>13</sup>CNMR (100 MHz, CDCl<sub>3</sub>)  $\delta$  (ppm) 39.50, 42.18, 43.80, 50.59, 112.79, 118.04, 119.94, 124.28, 126.84, 129.03, 130.30, 137.50, 146.89, 148.56, 175.16, 177.08. Anal.Calcd for C<sub>18</sub>H<sub>15</sub>N<sub>3</sub>O<sub>4</sub>: C 64.09, H 4.48, N 12.46. Found: C 63.89, H 4.57, N 13.04.

5-Methyl-2-(3-nitrophenyl)-3a,4,5,9b-tetrahydro-1H-pyrrolo[3,4-c]quinoline-1,3(2H)-dione (**3m**)

Yellow solid, mp = 189-191 °C (188-190 °C)<sup>5</sup>. IR (KBr)  $\nu_{\max}$  2923, 1709, 1528, 1497, 1385, 1352, 1187, 756 cm<sup>-1</sup>. <sup>1</sup>HNMR (250 MHz, CDCl<sub>3</sub>)  $\delta$  (ppm) 2.87 (s, 3H), 3.15 (d, 1H, *J* = 7.5, 2.5), 3.59-3.69 (m, 2H), 4.24 (d, 1H, *J* = 10.0 Hz), 6.78 (1H, d, *J* = 10.0 Hz), 6.94 (td, 1H, *J* = 7.5, 1.0 Hz), 7.24-7.31 (m, 2H), 7.53 (d, 1H, *J* = 7.5 Hz), 7.63 (t, 1H, *J* = 7.5 Hz), 7.70-7.75 (m, 1H), 8.25 (d, 1H, *J* = 10.0 Hz). <sup>13</sup>CNMR (101 MHz, CDCl<sub>3</sub>)  $\delta$  (ppm) 39.53, 42.22, 43.79, 50.62, 112.80, 118.10, 119.93, 121.62, 123.17, 129.01, 129.82, 130.31, 132.23, 133.04, 148.37, 148.59, 175.24, 177.18. Anal.Calcd for C<sub>18</sub>H<sub>15</sub>N<sub>3</sub>O<sub>4</sub>: C 64.09, H 4.48, N 12.46. Found: C 63.96, H 4.60, N 12.42.

2-Benzyl-5-methyl-3a,4,5,9b-tetrahydro-1H-pyrrolo[3,4-c]quinoline-1,3(2H)-dione (**3n**)

White solid, mp = 125 -127 °C (126-128 °C)<sup>7</sup>. IR (KBr)  $\nu_{\max}$  2956, 2864, 1781, 1709, 1594, 1493, 1392, 1346, 1167, 758, 707 cm<sup>-1</sup>. <sup>1</sup>HNMR (250 MHz, CDCl<sub>3</sub>)  $\delta$  (ppm) 2.70 (s, 3H), 2.94 (dd, 1H, *J* = 12.5, 5.0 Hz), 3.21-3.28 (m, 1H), 3.40 (dd, 1H, *J* = 12.5, 5.0 Hz), 3.87 (1H, d, *J* = 10.0 Hz), 4.48-4.62 (m, 2H), 6.63 (d, 1H, *J* = 7.5 Hz), 6.81 (td, 1H, *J* = 7.5, 1.0 Hz), 7.09-7.23 (m, 6H), 7.38 (d, 1H, *J* = 7.7 Hz). <sup>13</sup>CNMR (101 MHz, CDCl<sub>3</sub>)  $\delta$  (ppm) 39.40, 42.14, 42.83, 43.71, 50.81, 112.52, 118.93, 119.74, 127.86, 128.40, 128.54, 128.66, 130.29, 135.65, 148.54, 176.48, 178.45. Anal.Calcd for C<sub>19</sub>H<sub>18</sub>N<sub>2</sub>O<sub>2</sub>: C 74.49, H 5.92, N 9.14. Found: C 75.02, H 5.60, N 9.23.

2-Cyclohexyl-5-methyl-3a,4,5,9b-tetrahydro-1H-pyrrolo[3,4-c]quinoline-1,3(2H)-dione (**3o**)

Yellowish oil. IR (KBr)  $\nu_{\max}$  2928, 1710, 1639, 1463, 1379, 1268, 1135, 1082, 756 cm<sup>-1</sup>. <sup>1</sup>HNMR (250 MHz, CDCl<sub>3</sub>)  $\delta$  (ppm) 1.13-1.24 (m, 2H), 1.48-1.75 (m, 8H), 2.73 (s, 3H), 2.96 (dd, 1H, *J* = 10.0, 5.0 Hz), 3.18-3.26 (m, 1H), 3.39 (dd, 1H, *J* = 7.5, 2.5 Hz), 3.81-3.95 (m, 2H), 6.63 (d, 1H, *J* = 7.5 Hz), 6.74-6.85 (m, 1H), 7.14 (t, 1H, *J* = 7.5 Hz), 7.40 (d, 1H, *J* = 7.5 Hz). <sup>13</sup>CNMR (100 MHz, CDCl<sub>3</sub>)  $\delta$  (ppm) 25.16, 25.93, 28.97, 39.53, 41.84, 43.17, 50.94, 58.86, 112.49, 119.59, 128.54, 129.46, 130.31, 148.51, 176.98, 178.86. Anal.Calcd for C<sub>18</sub>H<sub>22</sub>N<sub>2</sub>O<sub>2</sub>: C 72.46, H 7.43, N 9.39. Found: C 71.96, H 7.54, N 9.45.

2-Isobutyl-5-methyl-3a,4,5,9b-tetrahydro-1H-pyrrolo[3,4-c]quinoline-1,3(2H)-dione (**3p**)

White solid, mp = 83-85 °C (82-84 °C)<sup>5</sup>. IR (KBr)  $\nu_{\max}$  2950, 1776, 1701, 1602, 1490, 1389, 1213, 1096, 1122, 753 cm<sup>-1</sup>. <sup>1</sup>HNMR (250 MHz, CDCl<sub>3</sub>)  $\delta$  (ppm) 0.73 (d, 6H, *J* = 7.5 Hz), 1.83-1.99 (m, 1H), 2.73 (s, 3H), 2.96 (dd, 1H, *J* = 7.5, 5.0 Hz), 3.25 (d, 2H, *J* = 7.5 Hz), 3.28-3.32 (m, 1H), 3.44 (dd, 1H, *J* = 7.5, 2.5 Hz), 3.90 (d, 1H, *J* = 10.0 Hz), 6.63 (d, 1H, *J* = 7.5 Hz), 6.82 (t, 1H, *J* = 7.5 Hz), 7.14 (t, 1H, *J* = 7.5 Hz), 7.39 (d, 1H, *J* = 7.5 Hz). <sup>13</sup>CNMR (101 MHz, CDCl<sub>3</sub>)  $\delta$  (ppm) 19.76, 26.85, 39.25, 42.00, 43.54, 46.30, 50.86, 112.32, 119.14, 119.58, 128.45, 130.14, 148.45, 176.95, 178.94. Anal.Calcd for C<sub>16</sub>H<sub>20</sub>N<sub>2</sub>O<sub>2</sub>: C 70.56, H 7.40, N 10.29. Found: C 70.49, H 7.48, N 10.36.

5-Methyl-3a,4,5,9b-tetrahydro-1H-pyrrolo[3,4-c]quinoline-1,3(2H)-dione (**3q**)

White solid, mp = 77-79 °C (77-79 °C)<sup>7</sup>. IR (KBr)  $\nu_{\max}$  3022, 2858, 1770, 1708, 1601, 1502, 1349, 1322, 1117, 789, 752 cm<sup>-1</sup>. <sup>1</sup>HNMR (250 MHz, CDCl<sub>3</sub>)  $\delta$  (ppm) 2.73 (s, 3H), 2.95 (dd, 1H, *J* = 7.5, 5.0 Hz), 3.34 (dd, 1H, *J* = 7.5, 2.5 Hz), 3.42 (dd, 1H, *J* = 7.5, 2.5 Hz), 3.95 (d, 1H, *J* = 10.0 Hz), 6.67 (d, 1H, *J* = 10.0 Hz), 6.82 (td, 1H, *J* = 7.5, 1.5 Hz), 7.10-7.17 (m, 1H), 7.35 (d, 1H, *J* = 7.5 Hz), 8.35 (s, 1H). <sup>13</sup>CNMR (101 MHz, CDCl<sub>3</sub>)  $\delta$  (ppm) 39.40, 43.24, 44.79, 50.39, 112.56, 118.39, 119.70, 128.71, 130.10, 148.50, 176.97, 178.99. Anal.Calcd for C<sub>12</sub>H<sub>12</sub>N<sub>2</sub>O<sub>2</sub>: C 66.65, H 5.59, N 12.96. Found: C 67.02, H 5.51, N 12.89.

5,8-Dimethyl-3a,4,5,9b-tetrahydro-1H-pyrrolo[3,4-c]quinoline-1,3(2H)-dione (**3r**)

White solid, mp = 80-82 °C. IR (KBr)  $\nu_{\max}$  3016, 2863, 1765, 1716, 1609, 1504, 1347, 1321, 1114, 792, 749 cm<sup>-1</sup>. <sup>1</sup>HNMR (250 MHz, CDCl<sub>3</sub>)  $\delta$  (ppm) 2.31 (s, 3H), 2.81 (s, 3H), 3.03 (dd, 1H, *J* = 7.5, 5.0 Hz), 3.42 (dd, 1H, *J* = 7.5, 2.5 Hz), 3.50 (dd, 1H, *J* = 7.5, 2.5 Hz), 4.03 (d, 1H, *J* = 10.0 Hz), 6.75 (d, 1H, *J* = 10.0 Hz), 7.22 (t, 1H, *J* = 7.5 Hz), 7.43 (d, 1H, *J* = 7.5 Hz), 8.43 (s, 1H). <sup>13</sup>CNMR (100 MHz, CDCl<sub>3</sub>)  $\delta$  (ppm) 22.26, 38.97, 42.80, 44.36, 49.96, 39, 112.12, 117.96, 119.27, 128.28, 129.67, 148.07, 176.54, 178.55. Anal.Calcd for C<sub>13</sub>H<sub>14</sub>N<sub>2</sub>O<sub>2</sub>: C 67.81, H 6.13, N 12.17. Found: C 67.90, H 5.94, N 12.75.

8-Bromo-5-methyl-2-phenyl-3a,4,5,9b-tetrahydro-1H-pyrrolo[3,4-c]quinoline-1,3(2H)-dione (**3s**)

White solid, mp = 157-159 °C (158-160 °C)<sup>5</sup>. IR (KBr)  $\nu_{\max}$  2931, 1711, 1497, 1393, 1324, 1189, 702, 632 cm<sup>-1</sup>. <sup>1</sup>HNMR (250 MHz, CDCl<sub>3</sub>)  $\delta$  (ppm) 2.75 (s, 3H), 3.06 (dd, 1H, *J* = 7.5, 2.5 Hz), 3.45-3.56 (m, 2H), 4.03 (d, 1H, *J* = 10.0 Hz), 6.58 (1H, d, *J* = 7.5 Hz), 7.16-7.40 (m, 6H), 7.58 (d, 1H, *J* = 2.5 Hz). <sup>13</sup>CNMR (100 MHz, CDCl<sub>3</sub>)  $\delta$  (ppm) 39.48, 41.78, 43.28, 50.37, 111.67, 114.27, 120.41, 126.31, 128.65, 129.07, 131.44, 131.82, 132.71, 147.50, 175.16, 177.28. Anal.Calcd for C<sub>18</sub>H<sub>15</sub>BrN<sub>2</sub>O<sub>2</sub>: C 58.24, H 4.07, N 7.55. Found: C 58.78, H 3.98, N 7.72.

5,8-Dimethyl-2-phenyl-3a,4,5,9b-tetrahydro-1H-pyrrolo[3,4-c]quinoline-1,3(2H)-dione (**3t**)

White solid, mp = 192-194 °C (193-195°C)<sup>5</sup>. IR (KBr)  $\nu_{\max}$  2935, 1710, 1509, 1392, 1268, 1189, 689, 624 cm<sup>-1</sup>. <sup>1</sup>HNMR (250 MHz, CDCl<sub>3</sub>)  $\delta$  (ppm) 2.24 (s, 1H), 2.74 (s, 3H), 3.0 (dd, 1H, *J* = 7.5, 5.0 Hz), 3.42-3.55 (m, 2H), 4.06 (d, 1H, *J* = 7.5 Hz), 6.60 (d, 1H, *J* = 7.5 Hz), 6.98 (dd, 1H, *J* = 7.5, 2.5 Hz), 7.19 (t, 1H, *J* = 2.5 Hz), 7.22 (d, 1H, *J* = 2.5 Hz), 7.28-7.40 (m, 4H). <sup>13</sup>CNMR (101 MHz, CDCl<sub>3</sub>)  $\delta$  (ppm) 20.45, 39.57, 42.18, 43.58, 50.94, 112.54, 118.50, 126.38, 128.50, 128.81, 128.99, 129.24, 130.82, 130.91, 146.37, 175.91, 177.86. Anal.Calcd for C<sub>19</sub>H<sub>18</sub>N<sub>2</sub>O<sub>2</sub>: C 74.49, H 5.92, N 9.14. Found: C 77.08, H 5.08, N 8.74.

Ethyl 9,11-dioxo-10-phenyl-5,9,10,11-tetrahydro-6H-pyrrolo[3',4':3,4]pyrrolo[2,1-a]isoquinoline-8-carboxylate (**5a**)

White solid, mp = 190-192 °C (191-192 °C)<sup>8</sup>. IR (KBr)  $\nu_{\max}$  3180, 2885, 1762, 1713, 1549, 1375, 1354, 1297, 1108, 943, 872, 865, 757 cm<sup>-1</sup>. <sup>1</sup>HNMR (250 MHz, CDCl<sub>3</sub>)  $\delta$  (ppm) 1.39 (t, 3H, *J* = 7.2 Hz), 3.11 (t, 2H, *J* = 6.7 Hz), 4.35 (q, 2H, *J* = 7.2 Hz), 4.70 (t, 2H, *J* = 7.2 Hz), 7.18-7.23 (m, 1H), 7.29-7.35 (m, 4H), 7.38-7.45 (m, 1H), 8.49-8.52 (m, 1H). <sup>13</sup>CNMR (100 MHz, CDCl<sub>3</sub>)  $\delta$  (ppm) 14.22, 28.36, 43.43, 61.71, 116.24, 118.69, 125.24, 125.57, 127.20, 127.70, 127.83, 127.98, 128.02, 128.95, 130.36, 132.47, 132.60, 133.51, 159.70, 161.65, 163.15. Anal.Calcd for C<sub>23</sub>H<sub>18</sub>N<sub>2</sub>O<sub>4</sub>: C 71.49, H 4.70, N 7.25. Found: C 71.52, H 4.65, N 9.08.

Methyl 9,11-dioxo-10-phenyl-5,9,10,11-tetrahydro-6H-pyrrolo[3',4':3,4]pyrrolo[2,1-a]isoquinoline-8-carboxylate (**5b**)

Orange solid, mp = 216-218 °C (117-118 °C)<sup>8</sup>. IR (KBr)  $\nu_{\max}$  3103, 2911, 1488, 1392, 1179, 757, 703, 618 cm<sup>-1</sup>. <sup>1</sup>HNMR (400 MHz, CDCl<sub>3</sub>)  $\delta$  (ppm); 3.18 (t, 2H, *J* = 6.7 Hz), 3.98 (s, 3H), 4.77 (t, 2H, *J* = 7.2 Hz), 7.26-7.51 (m, 8H), 8.55-8.59 (m, 1H). <sup>13</sup>CNMR (100 MHz, CDCl<sub>3</sub>)  $\delta$  (ppm); 28.31, 43.44, 52.36, 116.27, 118.50, 125.32, 125.49, 127.04, 127.69, 127.76, 127.98, 128.02, 128.87, 130.42, 132.44, 133.65, 160.05, 161.63, 163.00. Anal.Calcd for C<sub>22</sub>H<sub>16</sub>N<sub>2</sub>O<sub>4</sub>: C 70.96, H 4.33, N 7.52. Found: C 70.88, H 4.45, N 9.04.

Ethyl 10-(4-methoxyphenyl)-9,11-dioxo-5,9,10,11-tetrahydro-6H-pyrrolo[3',4':3,4]pyrrolo[2,1-a]isoquinoline-8-carboxylate (**5c**)

White solid, mp = 167-169 °C (168-169 °C)<sup>8</sup>. IR (KBr)  $\nu_{\max}$  3204, 2990, 1763, 1708, 1512, 1384, 1283, 1255, 1197, 1162, 1113, 1034, 811, 748 cm<sup>-1</sup>. <sup>1</sup>HNMR (400 MHz, CDCl<sub>3</sub>)  $\delta$  (ppm) 1.47 (t, 3H, *J* = 7.2 Hz), 3.19 (t, 2H, *J* = 6.8 Hz), 3.85 (s, 3H), 4.44 (q, 2H, *J* = 7.2 Hz), 4.78 (t, 2H, *J* = 6.8 Hz), 7.01 (d, 2H, *J* = 8.8 Hz), 7.25-7.43 (m, 5H), 8.58 (1H, d, *J* = 7.6 Hz) <sup>13</sup>CNMR (100 MHz, CDCl<sub>3</sub>)  $\delta$  (ppm) 14.10, 28.23, 43.24, 55.41, 61.57, 114.21, 116.24, 118.50, 125.19, 125.50, 127.60, 127.80, 128.05, 128.14, 128.41, 130.19, 132.38, 133.30, 158.83, 159.61, 161.95, 163.29. Anal.Calcd for C<sub>24</sub>H<sub>20</sub>N<sub>2</sub>O<sub>5</sub>: C 69.22, H 4.84, N 6.73. Found: C 69.26, H 4.81, N 6.69.

Ethyl 10-(4-bromophenyl)-9,11-dioxo-5,9,10,11-tetrahydro-6H-pyrrolo[3',4':3,4]pyrrolo[2,1-a]isoquinoline-8-carboxylate (**5d**)

White solid, mp = 190-192 °C (191-192 °C)<sup>8</sup>. <sup>1</sup>HNMR (400 MHz, CDCl<sub>3</sub>)  $\delta$  (ppm) 1.47 (t, 3H, *J* = 7.2 Hz), 3.17 (t, 2H, *J* = 7.2 Hz), 4.42 (q, 2H, *J* = 7.2 Hz), 4.76 (t, 2H, *J* = 7.2 Hz), 7.20-7.42 (m, 5H), 7.57 (d, 2H, *J* = 7.6 Hz), 8.52 (t, 1H, *J* = 6.8 Hz). <sup>13</sup>CNMR (100 MHz, CDCl<sub>3</sub>)  $\delta$  (ppm) 14.13, 28.23, 43.43, 61.69, 115.98, 118.80, 121.36, 124.90, 125.37, 127.72, 127.88, 128.00, 128.59, 130.52, 131.66, 131.97, 132.55, 133.60, 159.53, 161.20, 162.66. Anal.Calcd for C<sub>23</sub>H<sub>17</sub>BrN<sub>2</sub>O<sub>4</sub>: C 59.37, H 3.68, N 6.02. Found: C 59.29, H 3.91, N 6.11.

Ethyl 10-(4-nitrophenyl)-9,11-dioxo-5,9,10,11-tetrahydro-6H-pyrrolo[3',4':3,4]pyrrolo[2,1-a]isoquinoline-8-carboxylate (**5e**)

Yellow solid, mp = 205-207 °C (206-207 °C)<sup>8</sup>. IR (KBr)  $\nu_{\max}$  3126, 2984, 1765, 1719, 1523, 1387, 1327, 1261, 1208, 1145, 1118, 1057, 886, 859, 804, 763 cm<sup>-1</sup>. <sup>1</sup>HNMR (400 MHz, CDCl<sub>3</sub>)  $\delta$  (ppm) 1.50 (t, 3H, *J* = 7.2 Hz), 3.21 (t, 2H, *J* = 6.8 Hz), 4.45 (q, 2H, *J* = 7.2 Hz), 4.81 (t, 2H, *J* = 6.8 Hz), 7.33 (d, 1H, *J* = 6.4 Hz), 7.41 (t, 1H, *J* = 6.8 Hz), 7.50 (t, 1H, *J* = 6.8 Hz), 7.72 (d, 2H, *J* = 8.8 Hz), 8.36 (d, 2H, *J* = 8.8 Hz), 8.55 (1H, d, *J* = 6.4 Hz) <sup>13</sup>CNMR (100 MHz, CDCl<sub>3</sub>)  $\delta$  (ppm) 14.18, 28.20, 43.49, 61.83, 115.55, 119.22, 124.12, 124.39, 125.17, 126.79, 127.85, 128.06, 128.52, 130.70, 132.50, 134.03, 138.50, 145.95, 159.36, 160.58, 162.10. Anal.Calcd for C<sub>23</sub>H<sub>17</sub>N<sub>3</sub>O<sub>6</sub>: C 64.04, H 3.97, N 9.74. Found: C 64.13, H 3.89, N 9.67.

Methyl 10-cyclohexyl-9,11-dioxo-5,9,10,11-tetrahydro-6H-pyrrolo[3',4':3,4]pyrrolo[2,1-a]isoquinoline-8-carboxylate (**5f**)

yellow oil. IR (KBr)  $\nu_{\max}$  3029, 2864, 2857, 1685, 1676, 1645, 1450, 1231, 1082 cm<sup>-1</sup>. <sup>1</sup>HNMR (250 MHz, CDCl<sub>3</sub>)  $\delta$  (ppm) 1.18-1.36 (m, 4H), 1.55-1.81 (m, 4H), 2.08-2.23 (m, 2H), 3.07 (t, 2H, *J* = 7.0 Hz), 3.91 (s, 1H), 3.99-4.06 (m, 1H), 4.65 (t, 2H, *J* = 7.0 Hz), 7.18-7.21 (m, 1H), 7.25-7.37 (m, 2H), 8.46 (dd, 1H, *J* = 7.0, 2.0 Hz). <sup>13</sup>CNMR (100 MHz, CDCl<sub>3</sub>)  $\delta$  (ppm) 24.23, 25.14, 27.32, 28.85, 42.21, 50.02, 51.25, 115.68, 116.33, 124.61, 124.75, 126.57, 126.81, 126.87, 129.10, 131.31, 131.88, 159.17, 161.88, 163.13. Anal.Calcd for C<sub>22</sub>H<sub>22</sub>N<sub>2</sub>O<sub>4</sub>: C 69.83, H 5.86, N 7.40. Found: C 69.55, H 5.87, N 8.17.

Ethyl 10-benzyl-9,11-dioxo-5,9,10,11-tetrahydro-6H-pyrrolo[3',4':3,4]pyrrolo[2,1-a]isoquinoline-8-carboxylate (**5g**)

White solid, mp = 200-202 °C (200-201 °C)<sup>8</sup>. <sup>1</sup>HNMR (400 MHz, CDCl<sub>3</sub>)  $\delta$  (ppm) 1.48 (t, 3H, *J* = 7.2 Hz), 3.14 (t, 2H, *J* = 6.8 Hz), 4.43 (q, 2H, *J* = 7.2 Hz), 4.73 (t, 2H, *J* = 6.8 Hz), 4.79 (s, 2H), 7.26 (d, 1H, *J* = 8.0 Hz), 7.31 (t, 2H, *J* = 7.6 Hz), 7.35-7.41 (m, 3H), 7.45 (d, 2H, *J* = 7.6 Hz), 8.52 (1H, d, *J* = 7.6 Hz) <sup>13</sup>CNMR (100 MHz, CDCl<sub>3</sub>)  $\delta$  (ppm) 14.19, 28.17, 41.71, 43.15, 61.49, 116.31, 118.50, 125.37, 125.49, 127.40, 127.55, 127.68, 127.81, 128.41, 128.46, 130.10, 132.30, 132.88, 137.05, 159.54, 162.23, 163.70. Anal.Calcd for C<sub>24</sub>H<sub>20</sub>N<sub>2</sub>O<sub>4</sub>: C 71.99, H 5.03, N 7.0. Found: C 71.78, H 5.15, N 7.12.



**Methyl 10-isobutyl-9,11-dioxo-5,9,10,11-tetrahydro-6H-pyrrolo[3',4':3,4]pyrrolo[2,1-a]isoquinoline-8-carboxylate (5h)**

IR (KBr)  $\nu_{\max}$  3082, 2985, 1774, 1723, 1597, 1490, 1165, 1094, 764  $\text{cm}^{-1}$ .  $^1\text{H}$ NMR (250 MHz,  $\text{CDCl}_3$ )  $\delta$  (ppm) 0.84 (d, 6H,  $J = 6.7$  Hz), 1.93-2.10 (m, 1H), 3.05 (t, 2H,  $J = 7.0$  Hz), 3.31 (d, 1H,  $J = 7.2$  Hz), 3.87 (s, 3H), 4.61 (t, 2H,  $J = 7.0$  Hz), 7.14-7.32 (m, 3H), 8.41 (d, 1H,  $J = 6.7$  Hz).  $^{13}\text{C}$ NMR (100 MHz,  $\text{CDCl}_3$ )  $\delta$  (ppm) 20.21, 27.87, 28.22, 43.21, 45.59, 52.27, 116.50, 117.44, 125.49, 125.65, 127.57, 127.77, 130.14, 132.34, 132.89, 160.03, 162.87, 164.15. Anal.Calcd for  $\text{C}_{20}\text{H}_{10}\text{N}_2\text{O}_4$ : C 68.17, H 5.72, N 7.95. Found: C 68.22, H 5.62, N 8.09.

**Ethyl 9,11-dioxo-5,9,10,11-tetrahydro-6H-pyrrolo[3',4':3,4]pyrrolo[2,1-a]isoquinoline-8-carboxylate (5i)**

IR (KBr)  $\nu_{\max}$  3112, 2969, 1765, 1712, 1602, 1513, 1354, 1308, 1156, 772, 765  $\text{cm}^{-1}$ .  $^1\text{H}$ NMR (250 MHz,  $\text{CDCl}_3$ )  $\delta$  (ppm) 1.34 (t, 3H,  $J = 7.0$  Hz), 3.13 (t, 2H,  $J = 6.7$  Hz), 4.32 (q, 2H,  $J = 7.0$  Hz), 4.60 (t, 2H,  $J = 6.7$  Hz), 7.38-7.42 (m, 3H), 8.33 (t, 1H,  $J = 4.5$  Hz), 10.71 (s, 1H).  $^{13}\text{C}$ NMR (100 MHz,  $\text{CDCl}_3$ )  $\delta$  (ppm) 14.49, 27.86, 44.03, 60.19, 117.21, 117.69, 125.30, 126.23, 126.88, 127.43, 128.36, 130.56, 131.91, 133.24, 158.95, 163.11, 164.89. Anal.Calcd for  $\text{C}_{17}\text{H}_{14}\text{N}_2\text{O}_4$ : C 65.80, H 4.55, N 9.03. Found: C 66.08, H 4.19, N 8.89.

**Diethyl 1-methyl-1,2-dihydroquinoline-3,4-dicarboxylate (7a)**

$^1\text{H}$ NMR (250 MHz,  $\text{CDCl}_3$ )  $\delta$  (ppm) 1.01 (t, 3H,  $J = 7.5$  Hz), 1.16 (t, 3H,  $J = 7.5$  Hz), 3.15 (s, 3H), 4.00-4.09 (m, 4H), 4.73 (s, 2H), 7.13-7.22 (m, 3H), 7.26 (d, 1H,  $J = 7.5$  Hz).  $^{13}\text{C}$ NMR (100 MHz,  $\text{CDCl}_3$ )  $\delta$  (ppm) 12.60, 13.41, 39.80, 58.43, 60.74, 87.55, 119.47, 120.79, 125.80, 126.35, 128.32, 128.48, 143.66, 153.14, 163.71, 166.25. Anal.Calcd for  $\text{C}_{16}\text{H}_{19}\text{NO}_4$ : C 66.42, H 6.62, N 4.84. Found: C 67.04, H 6.44, N 4.73.

**Diethyl 1,6-dimethyl-1,2-dihydroquinoline-3,4-dicarboxylate (7b)**

$^1\text{H}$ NMR (250 MHz,  $\text{CDCl}_3$ )  $\delta$  (ppm) 1.01 (t, 3H,  $J = 7.5$  Hz), 1.15 (t, 3H,  $J = 7.5$  Hz), 2.24 (s, 3H), 3.14 (s, 3H), 3.98-4.12 (m, 4H), 4.72 (s, 2H), 6.88 (d, 1H,  $J = 7.5$  Hz), 7.01 (t, 3H,  $J = 7.5$  Hz).  $^{13}\text{C}$ NMR (100 MHz,  $\text{CDCl}_3$ )  $\delta$  (ppm) 12.76, 13.57, 22.33, 39.96, 58.60, 60.90, 87.72, 121.70, 125.91, 126.53, 127.35, 127.94, 128.25, 143.77, 153.08, 163.85, 166.36. Anal.Calcd for  $\text{C}_{17}\text{H}_{21}\text{NO}_4$ : C 67.31, H 6.98, N 4.62. Found: C 67.83, H 6.56, N 4.49.

**Diethyl 6-bromo-1-methyl-1,2-dihydroquinoline-3,4-dicarboxylate (7c)**

$^1\text{H}$ NMR (250 MHz,  $\text{CDCl}_3$ )  $\delta$  (ppm) 0.97 (t, 3H,  $J = 7.5$  Hz), 1.09 (t, 3H,  $J = 7.5$  Hz), 3.10 (s, 3H), 3.96-4.08 (m, 4H), 4.68 (s, 2H), 7.57-7.88 (m, 3H).  $^{13}\text{C}$ NMR (100 MHz,  $\text{CDCl}_3$ )  $\delta$  (ppm) 12.67, 13.46, 39.86, 58.52, 60.81, 87.59, 119.41, 120.67, 125.84, 126.32, 128.38, 128.54, 143.53, 153.18, 163.75, 166.29. Anal.Calcd for  $\text{C}_{16}\text{H}_{18}\text{BrNO}_4$ : C 52.19, H 4.93, N 3.80. Found: C 52.61, H 4.73, N 4.02.

**Dimethyl 1-methyl-1,2-dihydroquinoline-3,4-dicarboxylate (7d)**

$^1\text{H}$ NMR (250 MHz,  $\text{CDCl}_3$ )  $\delta$  (ppm) 3.15 (s, 3H), 3.57 (s, 3H), 3.60 (s, 3H), 4.73 (s, 2H), 7.11-7.14 (m, 1H), 7.14-7.17 (m, 1H), 7.26 (t, 1H,  $J = 2.5$  Hz), 7.29 (t, 1H,  $J = 2.5$  Hz).  $^{13}\text{C}$ NMR (100 MHz,  $\text{CDCl}_3$ )  $\delta$  (ppm) 40.82, 50.94, 52.61, 88.15, 122.38, 126.53, 127.44, 129.46, 129.64, 135.20, 144.55, 154.20, 165.33, 167.84. Anal.Calcd for  $\text{C}_{14}\text{H}_{15}\text{NO}_4$ : C 64.36, H 5.79, N 5.36. Found: C 64.02, H 6.11, N 5.28.

**Dimethyl 1,6-dimethyl-1,2-dihydroquinoline-3,4-dicarboxylate (7e)**

$^1\text{H}$ NMR (250 MHz,  $\text{CDCl}_3$ )  $\delta$  (ppm) 3.65 (s, 3H), 4.06 (s, 3H), 4.09 (s, 3H), 4.79 (s, 2H), 7.65-7.90 (m, 3H).  $^{13}\text{C}$ NMR (100 MHz,  $\text{CDCl}_3$ )  $\delta$  (ppm) 22.41, 40.74, 50.87, 52.53, 88.07, 122.03, 126.24, 126.87, 127.69, 128.27, 128.60, 144.53, 154.21, 165.35, 167.85. Anal.Calcd for  $\text{C}_{15}\text{H}_{17}\text{NO}_4$ : C 65.44, H 6.22, N 5.09. Found: C 65.50, H 6.17, N 5.13.

**Dimethyl 6-bromo-1-methyl-1,2-dihydroquinoline-3,4-dicarboxylate (7f)**

$^1\text{H}$ NMR (250 MHz,  $\text{CDCl}_3$ )  $\delta$  (ppm) 3.65 (s, 3H), 4.06 (s, 3H), 4.09 (s, 3H), 4.79 (s, 2H), 7.65-7.90 (m, 3H).  $^{13}\text{C}$ NMR (100 MHz,  $\text{CDCl}_3$ )  $\delta$  (ppm) 40.86, 50.93, 52.63, 88.17, 119.54, 120.69, 125.85, 126.35, 128.39, 128.56, 144.60, 154.24, 165.36, 167.87. Anal.Calcd for  $\text{C}_{14}\text{H}_{14}\text{BrNO}_4$ : C 49.43, H 4.15, N 4.12. Found: C 49.13, H 3.96, N 4.32.

**1-methyl-4-phenyl-1,2-dihydroquinoline (7g)**

IR (KBr)  $\nu_{\max}$  3045, 3030, 2969, 1632, 1614, 1587, 1573  $\text{cm}^{-1}$ .  $^1\text{H}$ NMR (400 MHz,  $\text{CDCl}_3$ )  $\delta$  (ppm); 2.99 (s, 3H), 4.00 (d, 2H,  $J = 7.2$  Hz), 6.09 (t, 1H,  $J = 7.6$  Hz), 6.78 (t, 1H,  $J = 7.2$  Hz), 6.89 (d, 1H,  $J = 6.8$  Hz), 7.10 (t, 1H,  $J = 7.6$  Hz), 7.30 (t, 1H,  $J = 8.0$  Hz), 7.37-7.47 (m, 3H), 7.59 (t, 2H,  $J = 7.6$  Hz).  $^{13}\text{C}$ NMR (100 MHz,  $\text{CDCl}_3$ )  $\delta$  (ppm); 38.69, 47.03, 119.81, 120.56, 121.10, 121.43, 122.89, 124.37, 126.63, 127.16, 127.44, 133.24, 133.77, 145.29. Anal.Calcd for  $\text{C}_{16}\text{H}_{15}\text{N}$ : C 86.84, H 6.83, N 6.33. Found: C 86.79, H 6.91, N 6.45.

**1-methyl-4-(p-tolyl)-1,2-dihydroquinoline (7h)**

IR (KBr)  $\nu_{\max}$  3122, 3084, 2958, 1645, 1618, 1577, 1562  $\text{cm}^{-1}$ .  $^1\text{H}$ NMR (400 MHz,  $\text{CDCl}_3$ )  $\delta$  (ppm); 2.47 (s, 3H), 3.25 (s, 3H), 4.35 (d, 2H,  $J = 8.0$  Hz), 6.22 (t, 1H,  $J = 7.6$  Hz), 6.86 (t, 1H,  $J = 7.6$  Hz), 6.99 (d, 1H,  $J = 7.6$  Hz), 7.24-7.33 (m, 4H), 7.50-7.55 (m, 2H).  $^{13}\text{C}$ NMR (100 MHz,  $\text{CDCl}_3$ )  $\delta$  (ppm); 20.68, 39.02, 47.11, 120.24, 121.15, 121.99, 122.21, 123.31, 124.88, 127.25, 128.18, 131.75, 133.92, 137.56, 148.48. Anal.Calcd for  $\text{C}_{17}\text{H}_{17}\text{N}$ : C 86.77, H 7.28, N 5.95. Found: C 86.74, H 7.23, N 6.03.

**1,6-dimethyl-4-phenyl-1,2-dihydroquinoline (7i)**

IR (KBr)  $\nu_{\max}$  3073, 3042, 2957, 1641, 1610, 1582, 1569  $\text{cm}^{-1}$ .  $^1\text{H}$ NMR (400 MHz,  $\text{CDCl}_3$ )  $\delta$ (ppm); 2.99 (s, 3H), 4.00 (d, 2H,  $J = 7.2$  Hz), 6.09 (t, 1H,  $J = 7.6$  Hz), 6.78 (t, 1H,  $J = 7.2$  Hz), 6.89 (d, 1H,  $J = 6.8$  Hz), 7.10 (t, 1H,  $J = 7.6$  Hz), 7.30 (t, 1H,  $J = 8.0$  Hz), 7.37-7.47 (m, 3H), 7.59 (t, 2H,  $J = 7.6$  Hz).  $^{13}\text{C}$ NMR (100 MHz,  $\text{CDCl}_3$ ),  $\delta$ (ppm); 21.72, 39.20, 47.53, 115.81, 122.13, 124.93, 125.10, 127.11, 127.61, 127.83, 127.88, 128.13, 133.72, 134.09, 144.47. Anal.Calcd for  $\text{C}_{17}\text{H}_{17}\text{N}$ : C 86.77, H 7.28, N 5.95. Found: C 86.55, H 7.41, N 6.04.

**1,6-dimethyl-4-(p-tolyl)-1,2-dihydroquinoline (7j)**

IR (KBr)  $\nu_{\max}$  3038, 3052, 2965, 1644, 1609, 1567, 1579  $\text{cm}^{-1}$ .  $^1\text{H}$ NMR (400 MHz,  $\text{CDCl}_3$ )  $\delta$ (ppm); 2.35 (s, 3H), 2.37 (s, 3H), 3.20 (s, 3H), 3.98 (d, 2H,  $J = 7.2$  Hz), 6.18 (t, 1H,  $J = 7.6$  Hz), 6.79 (d, 1H,  $J = 7.6$  Hz), 6.91 (d, 1H,  $J = 7.6$  Hz), 7.15-7.21 (m, 3H), 7.38 (t, 2H,  $J = 7.6$  Hz).  $^{13}\text{C}$ NMR (100 MHz,  $\text{CDCl}_3$ ),  $\delta$ (ppm); 20.94, 21.50, 39.72, 48.31, 115.76, 122.83, 125.59, 125.77, 128.03, 128.60, 128.80, 129.25, 132.31, 134.79, 138.33, 145.44. Anal.Calcd for  $\text{C}_{18}\text{H}_{19}\text{N}$ : C 86.70, H 7.68, N 5.62. Found: C 86.75, H 7.76, N 5.49.

**6-bromo-1-methyl-4-phenyl-1,2-dihydroquinoline (7k)**

IR (KBr)  $\nu_{\max}$  3029, 3011, 2975, 1638, 1624, 1592, 1575  $\text{cm}^{-1}$ .  $^1\text{H}$ NMR (400 MHz,  $\text{CDCl}_3$ )  $\delta$ (ppm); 2.93 (s, 3H), 3.89 (d, 2H,  $J = 8.8$  Hz), 5.87 (t, 1H,  $J = 8.8$  Hz), 6.40 (d, 1H,  $J = 8.8$  Hz), 7.04 (dd, 1H,  $J = 6.0, 3.2$  Hz), 7.12 (t, 1H,  $J = 8.4$  Hz), 7.20-7.27 (m, 2H), 7.45-7.54 (m, 3H).  $^{13}\text{C}$ NMR (100 MHz,  $\text{CDCl}_3$ ),  $\delta$ (ppm); 42.54, 50.74, 115.02, 118.67, 124.93, 126.85, 127.75, 128.49, 128.86, 129.55, 130.82, 134.42, 134.93, 147.02. Anal.Calcd for  $\text{C}_{16}\text{H}_{14}\text{BrN}$ : C 64.02, H 4.70, N 4.67. Found: C 64.11, H 4.64, N 4.60.

**6-bromo-1-methyl-4-(p-tolyl)-1,2-dihydroquinoline (7l)**

IR (KBr)  $\nu_{\max}$  3045, 3030, 2969, 1632, 1614, 1587, 1573  $\text{cm}^{-1}$ .  $^1\text{H}$ NMR (400 MHz,  $\text{CDCl}_3$ )  $\delta$ (ppm); 2.37 (s, 3H), 3.20 (s, 3H), 4.07 (d, 2H,  $J = 8.8$  Hz), 6.13 (t, 1H,  $J = 8.8$  Hz), 6.64 (d, 1H,  $J = 8.0$  Hz), 7.14-7.23 (m, 3H), 7.39 (d, 2H,  $J = 8.0$  Hz), 7.68 (s, 1H).  $^{13}\text{C}$ NMR (100 MHz,  $\text{CDCl}_3$ ),  $\delta$ (ppm); 22.46, 42.77, 49.92, 115.22, 118.82, 123.54, 125.97, 128.90, 129.87, 130.25, 131.55, 133.21, 135.63, 39.14, 146.98. Anal.Calcd for  $\text{C}_{17}\text{H}_{16}\text{BrN}$ : C 64.98, H 5.13, N 4.46. Found: C 64.88, H 5.17, N 4.51.

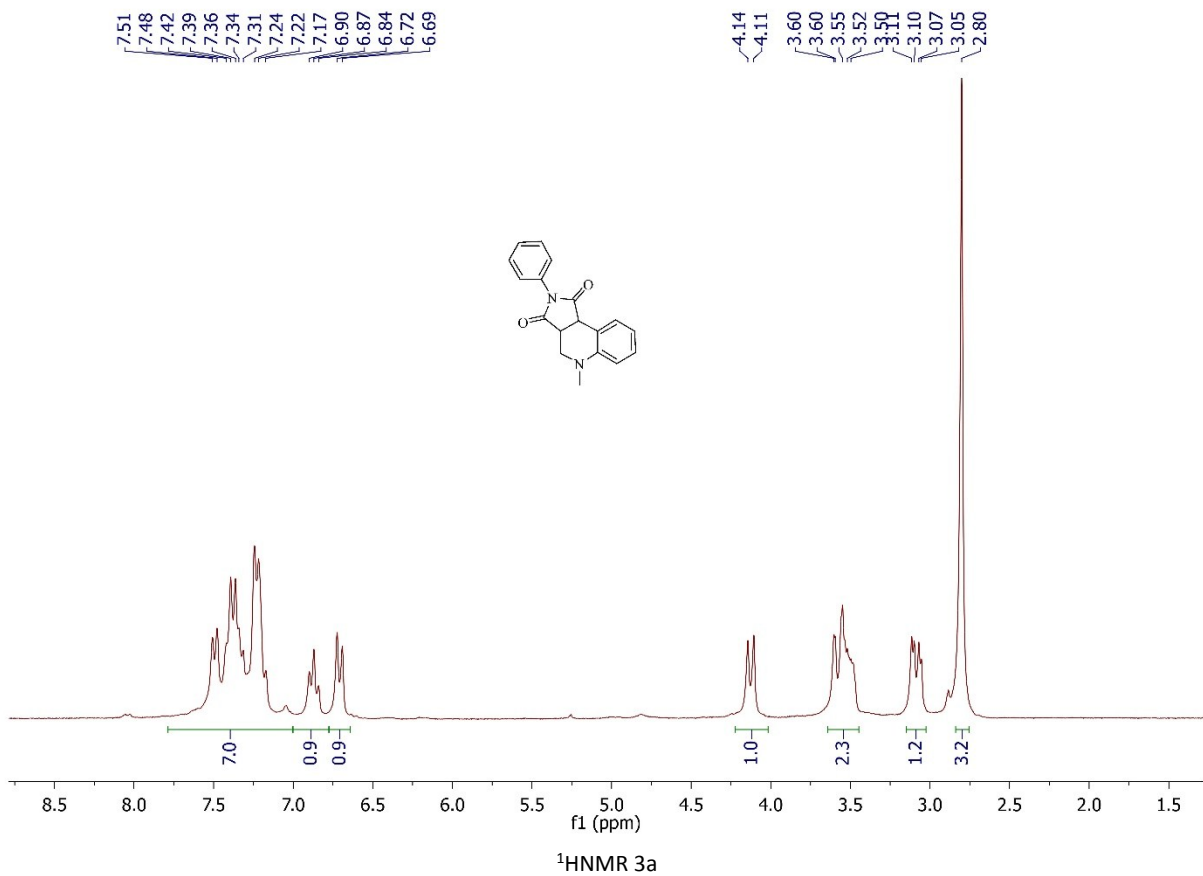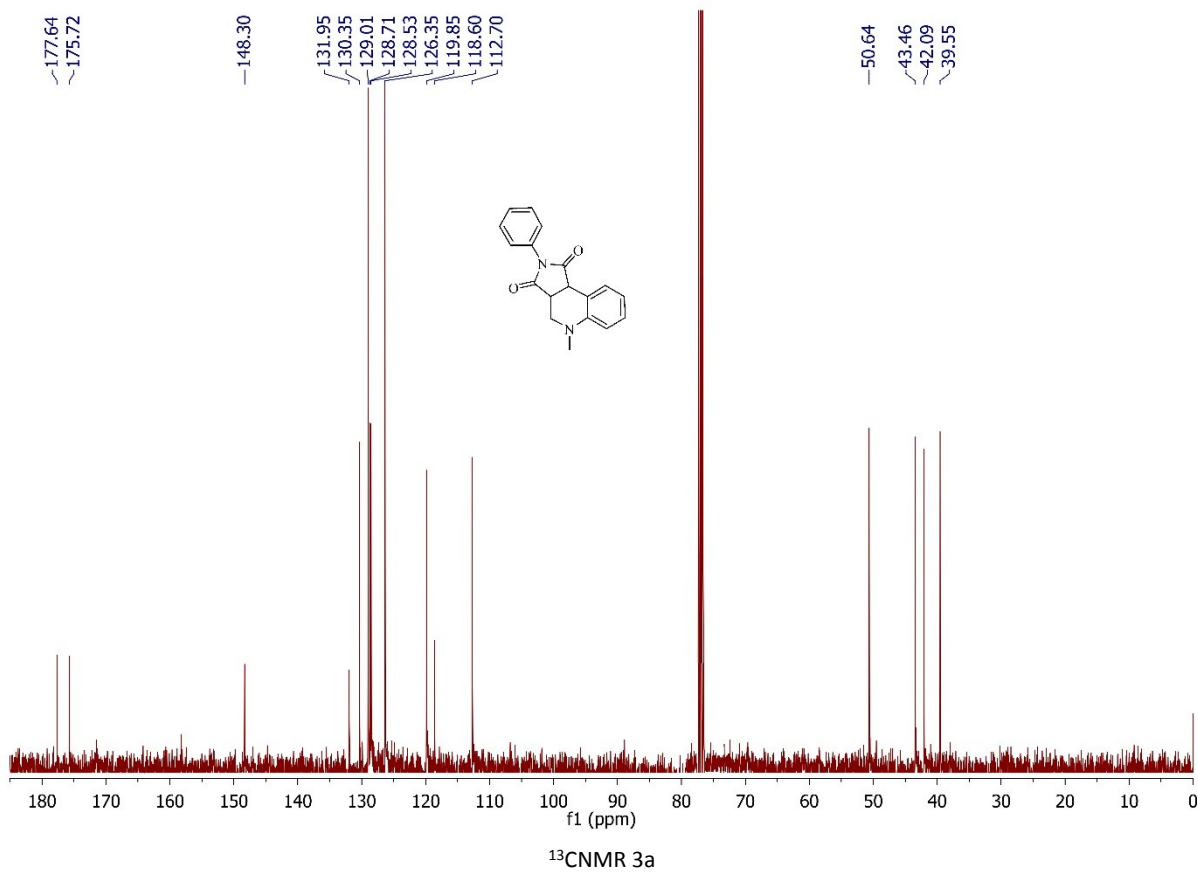

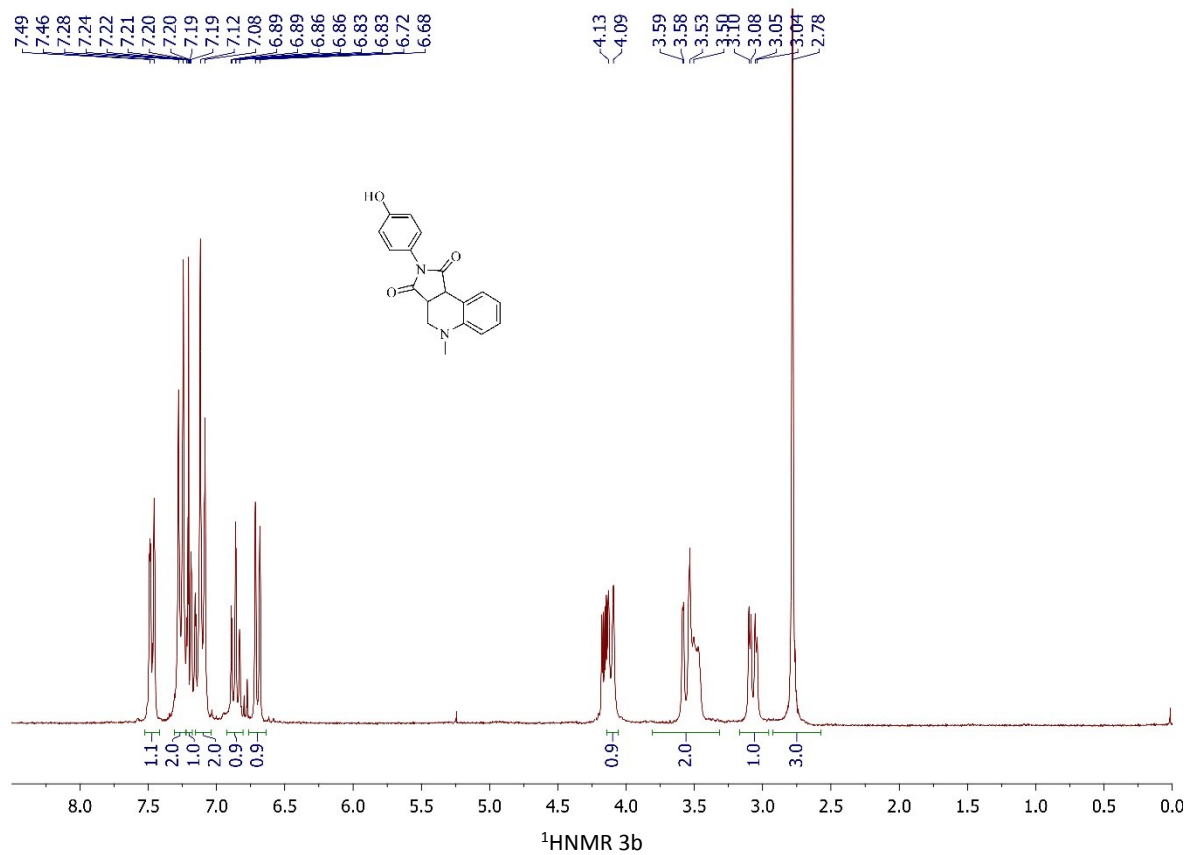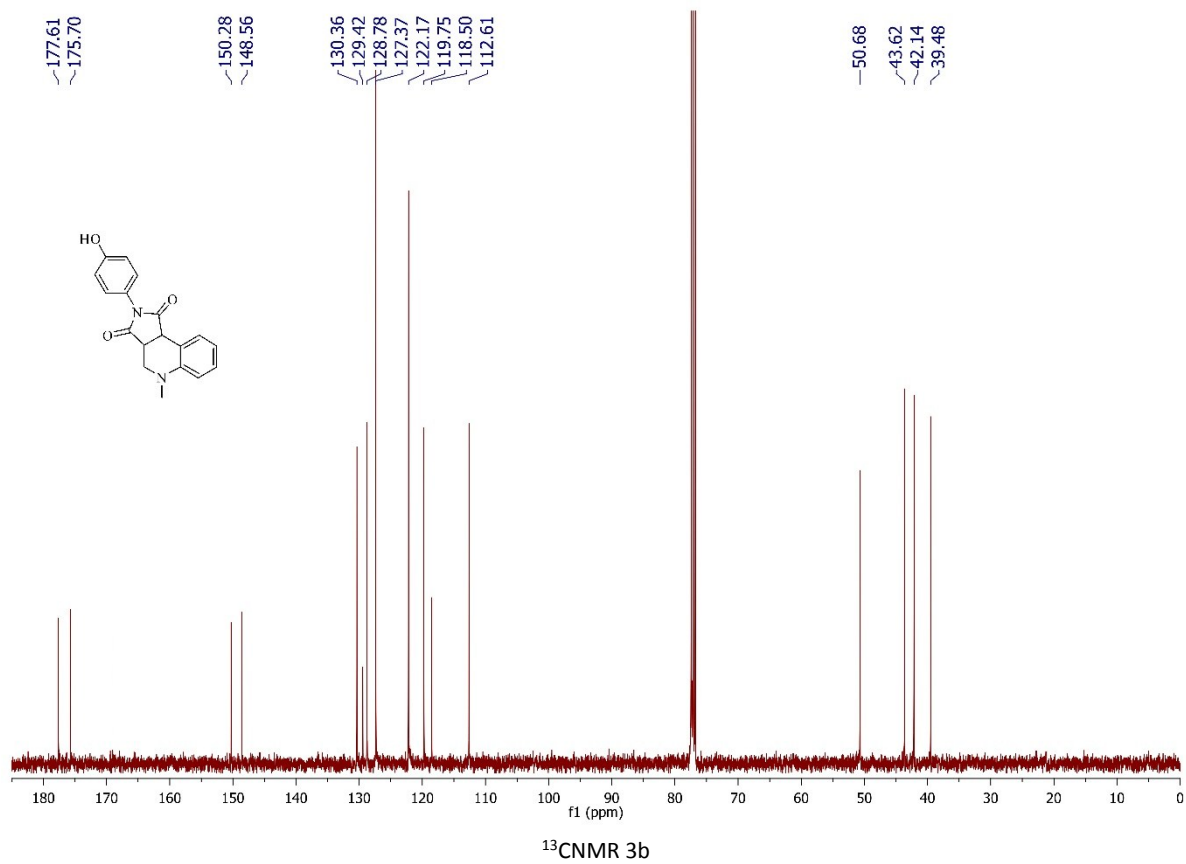

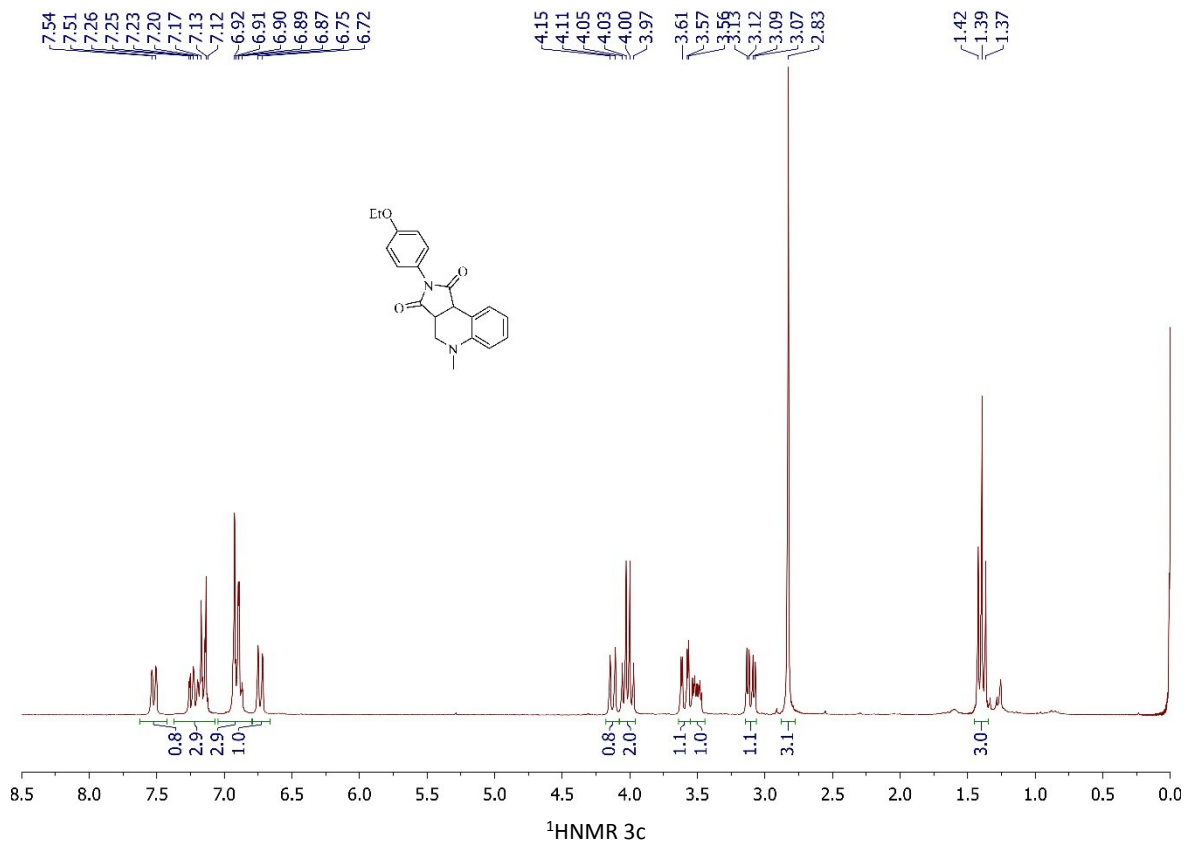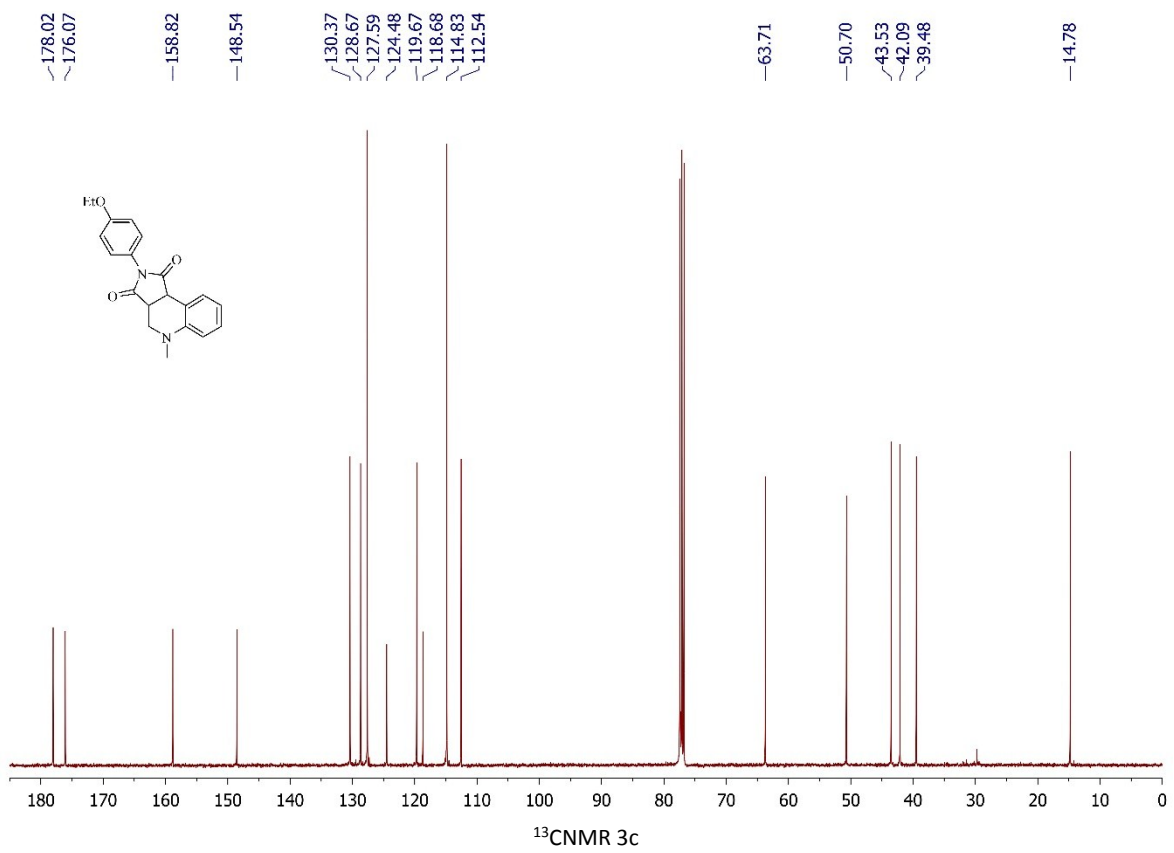

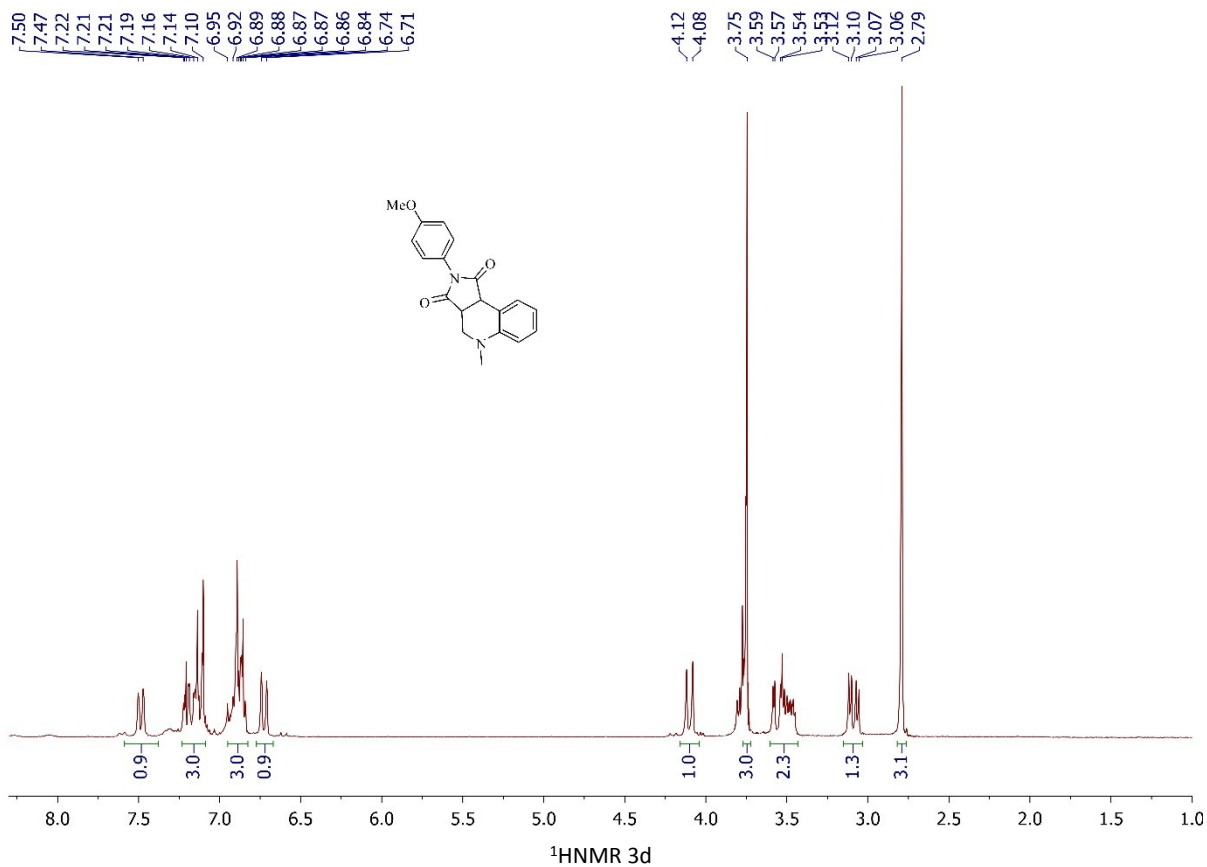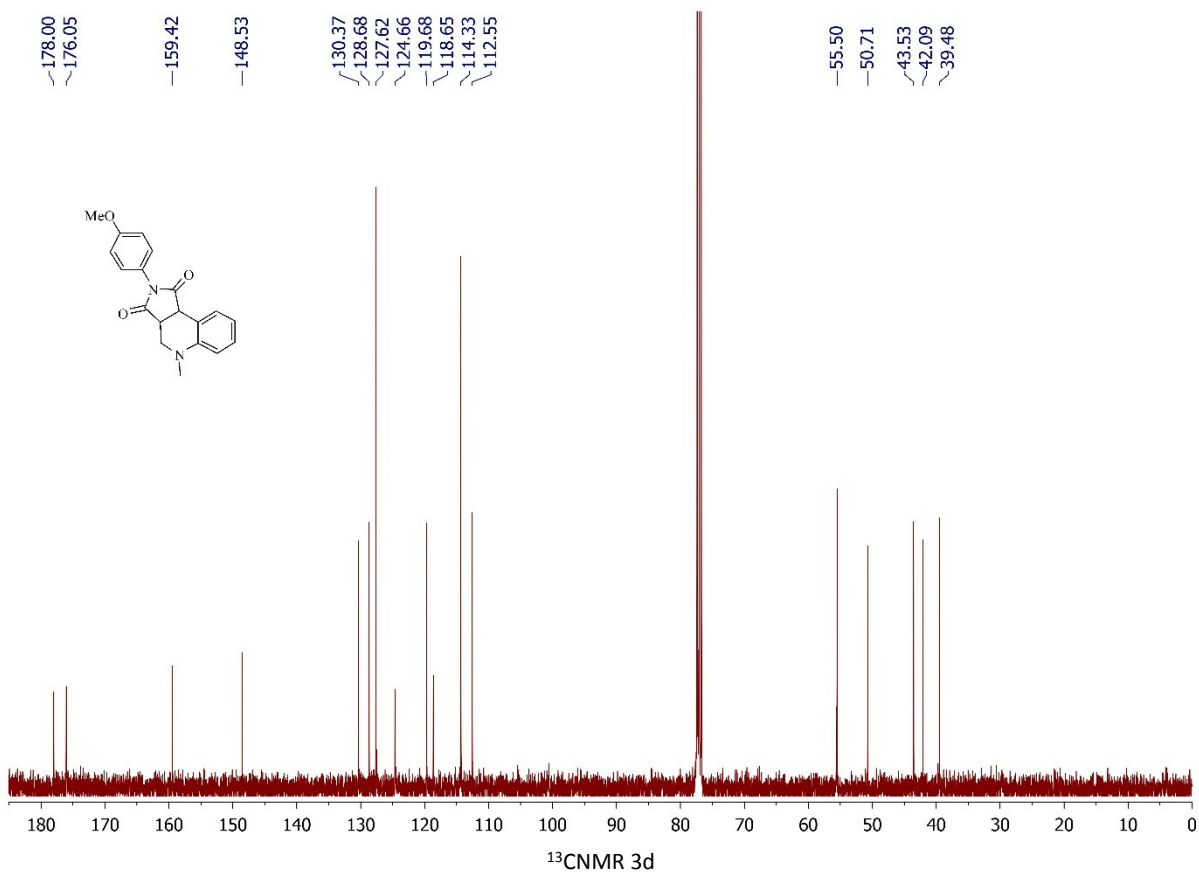

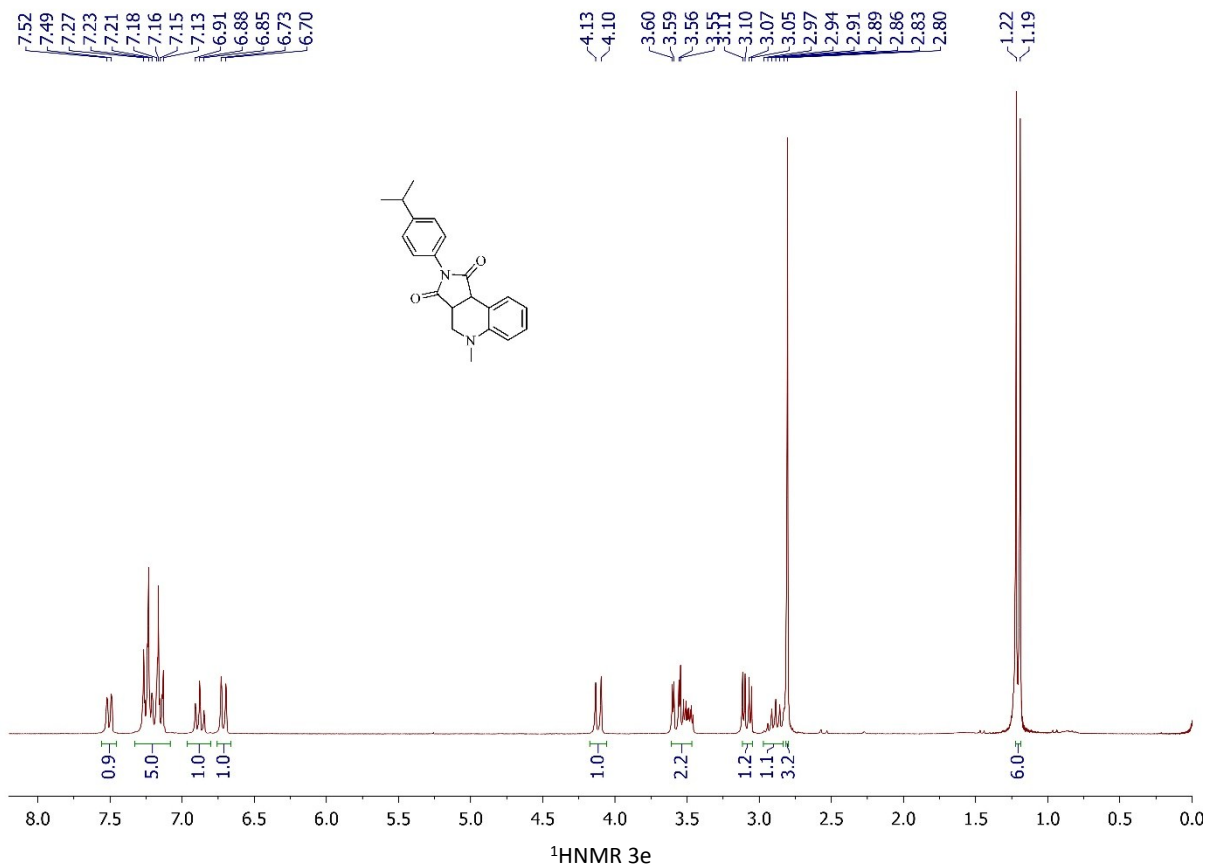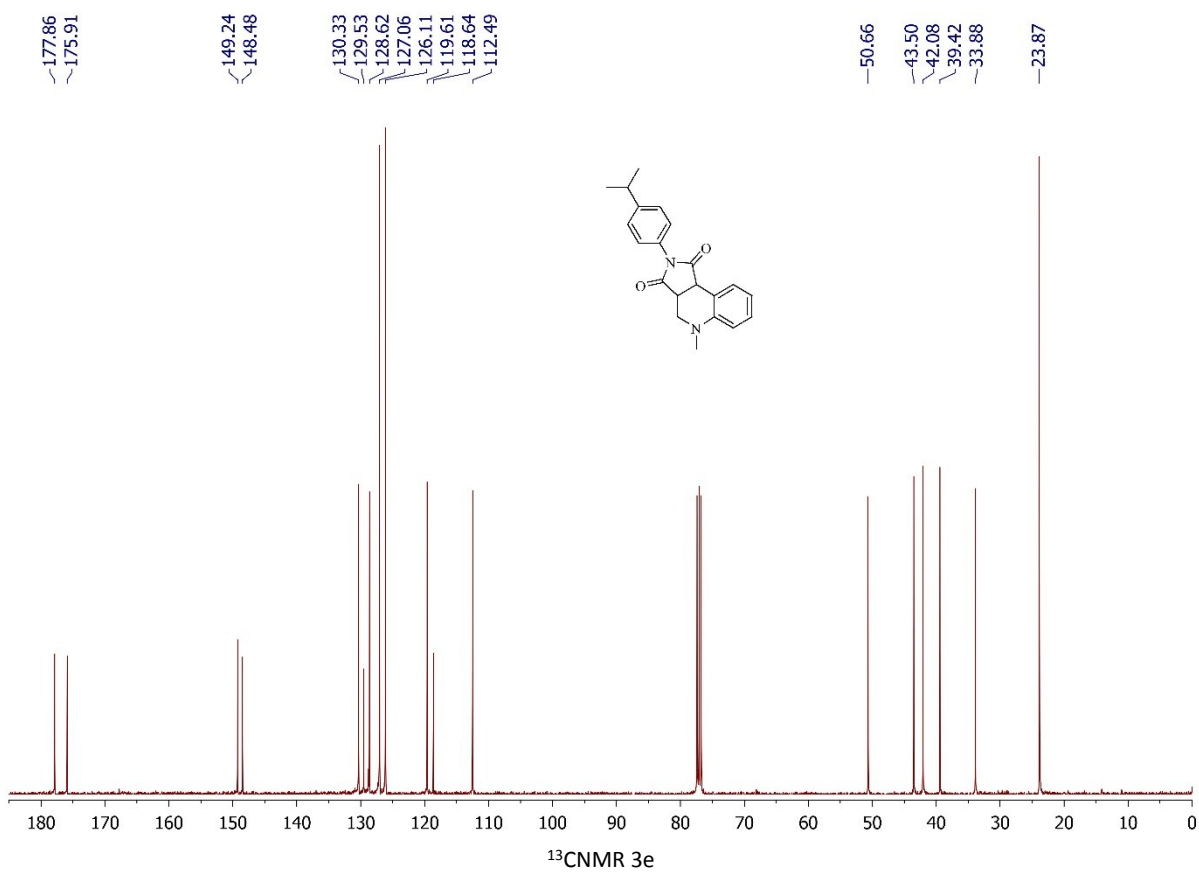

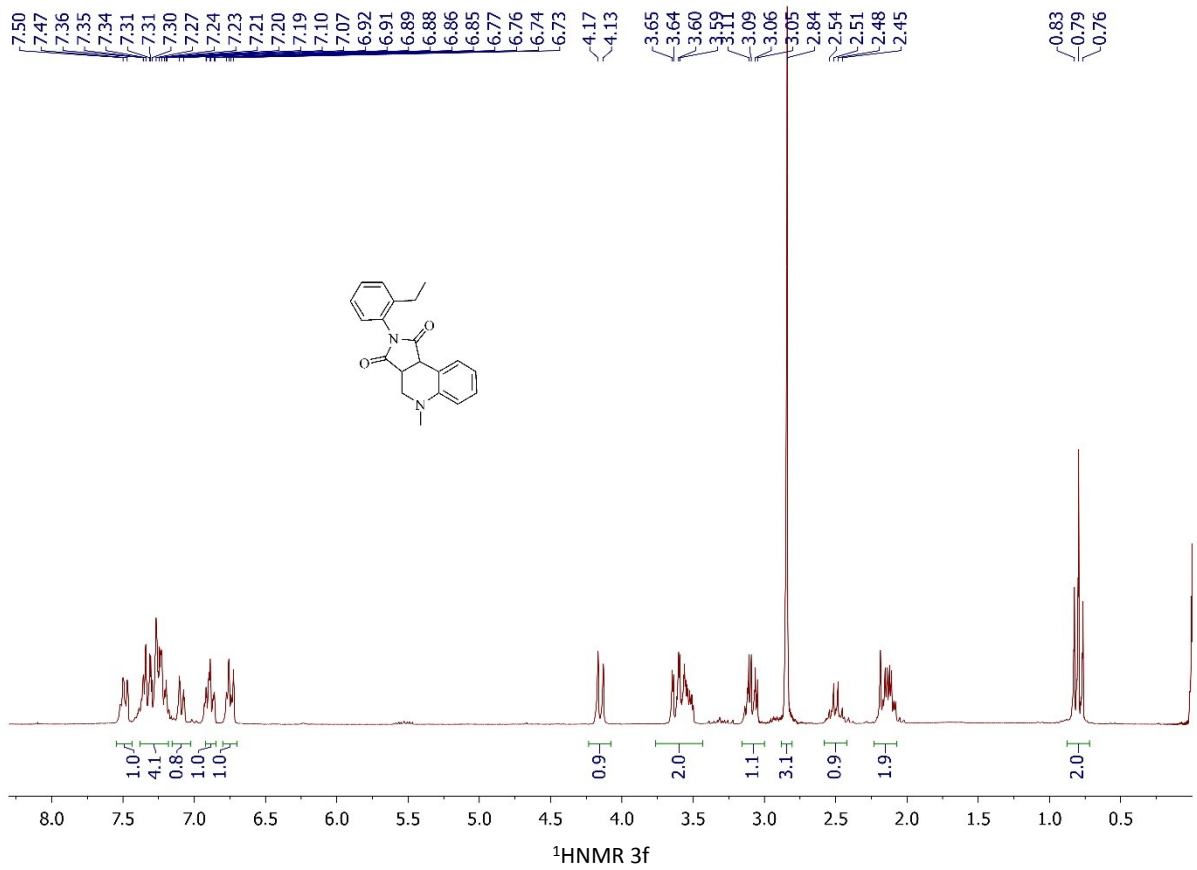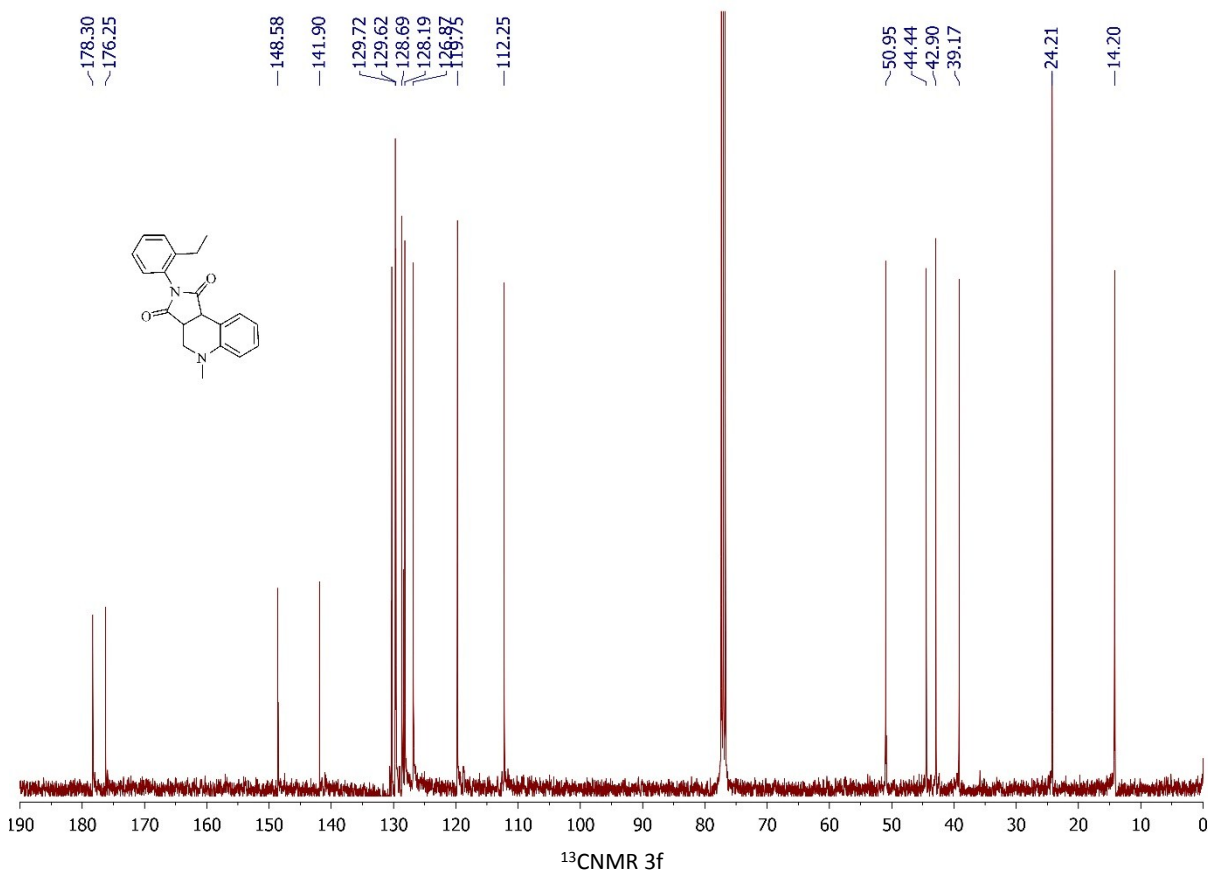



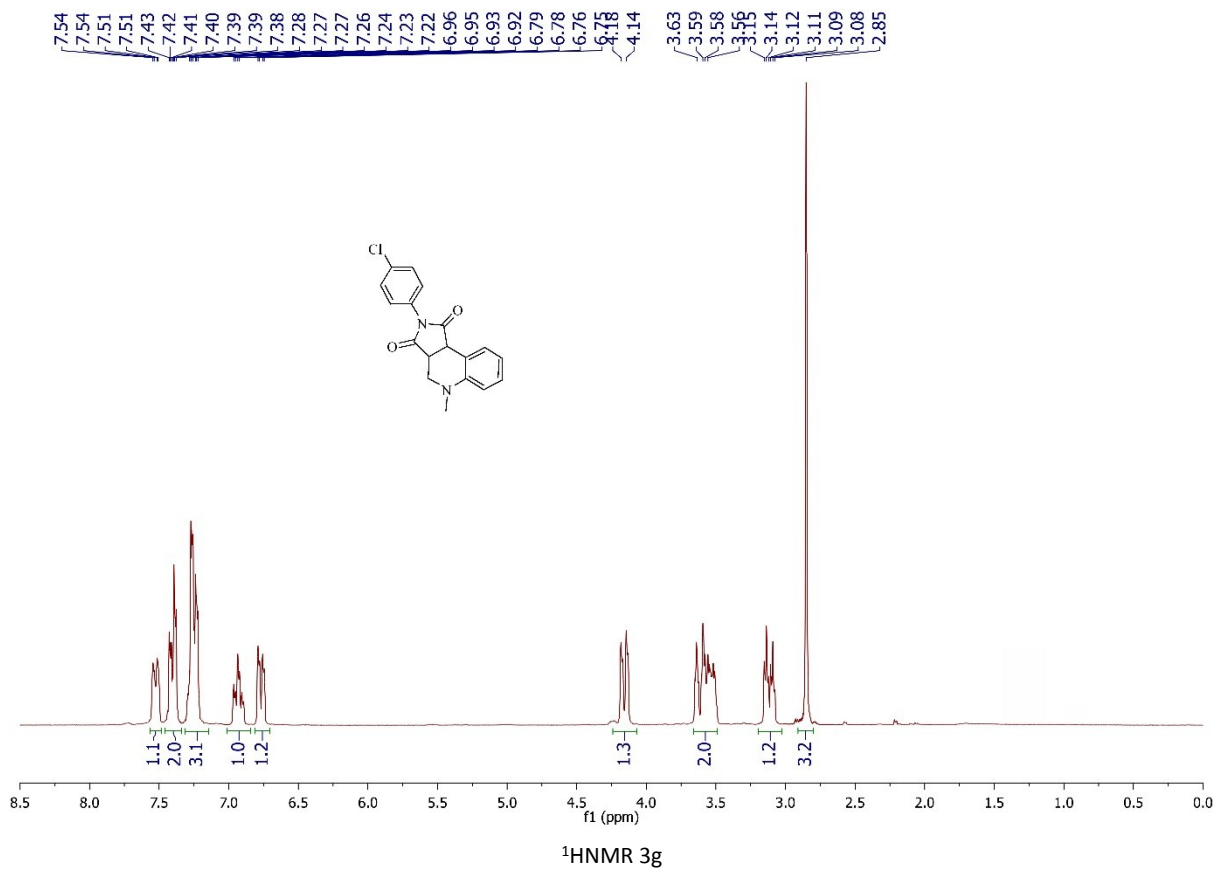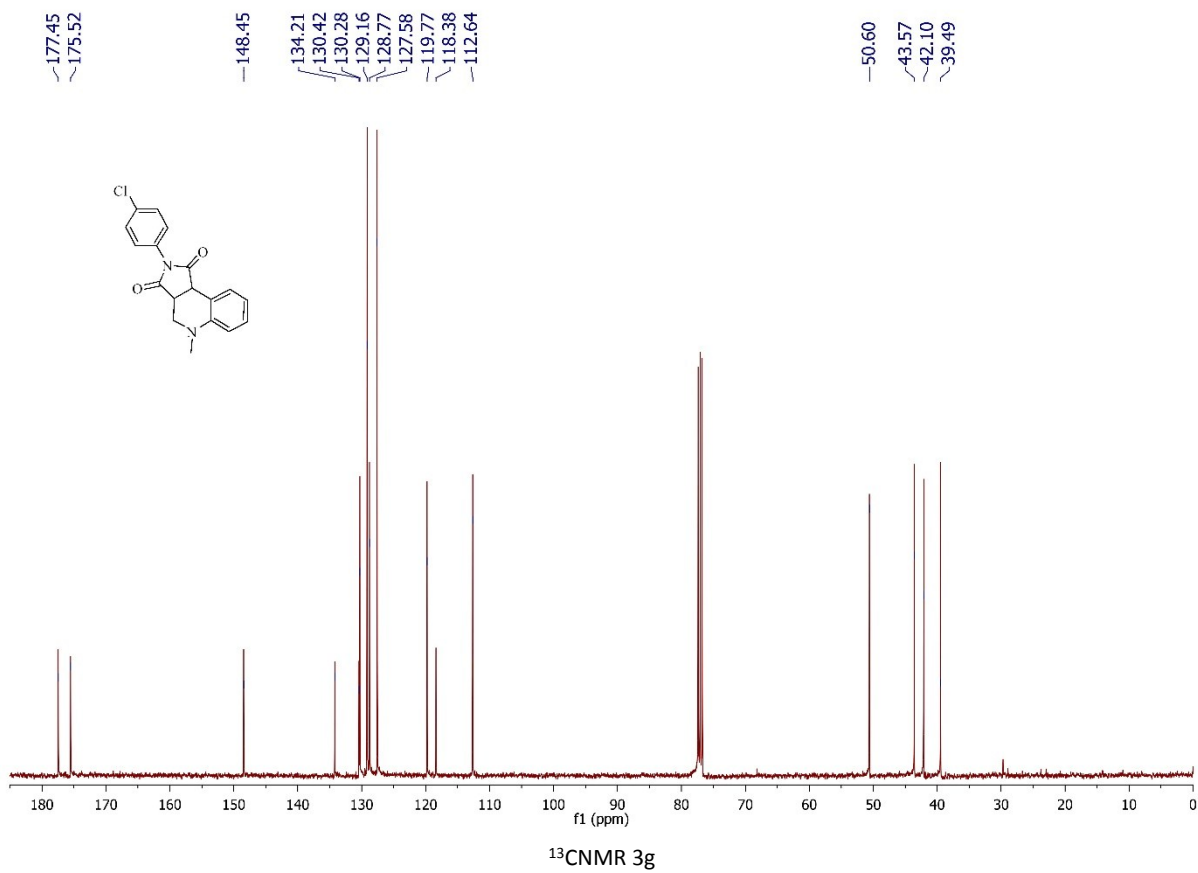

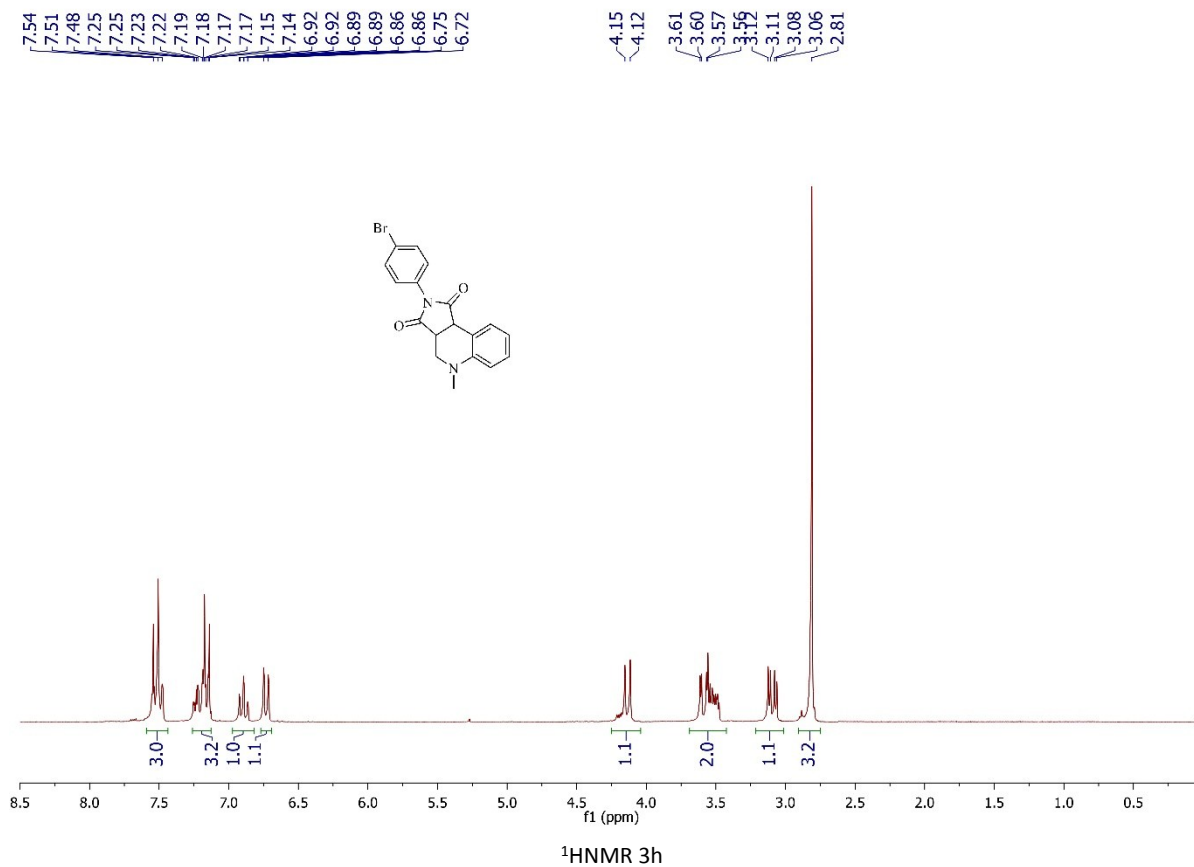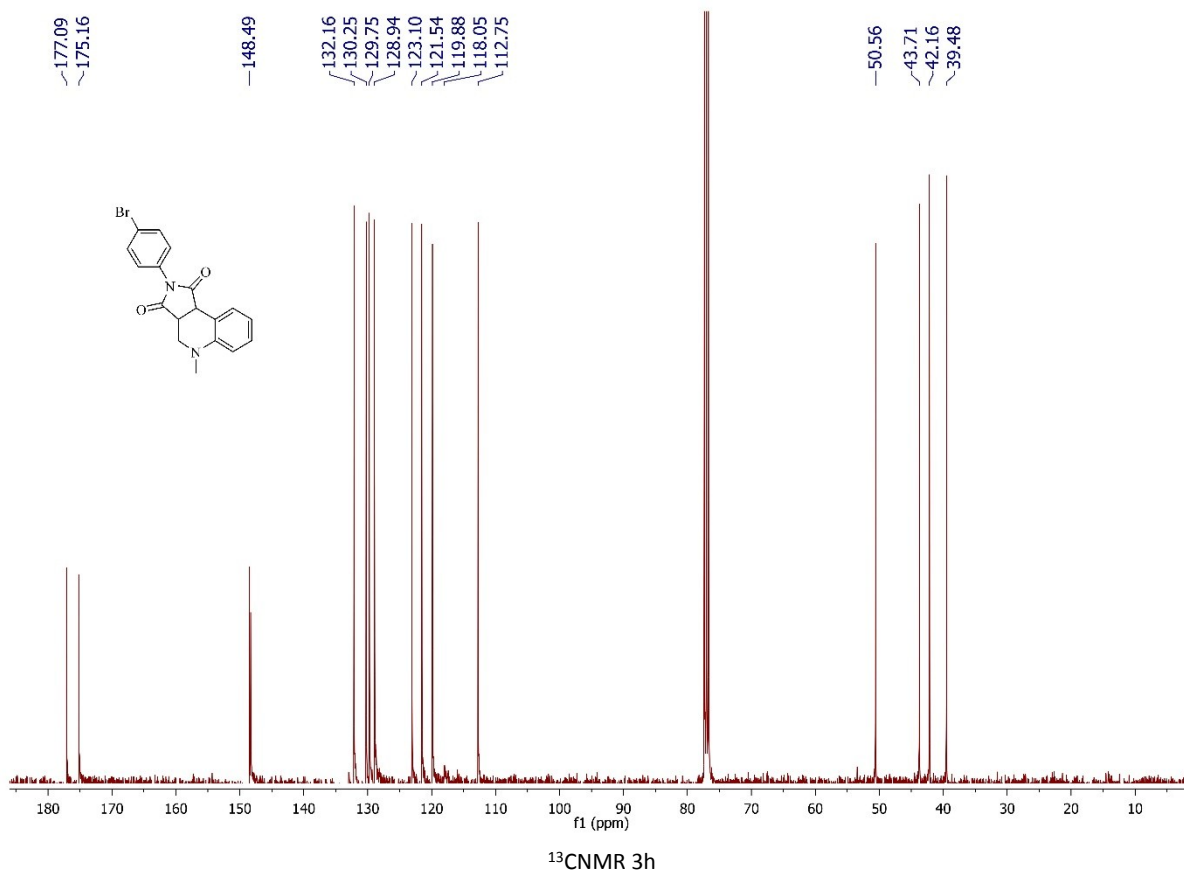

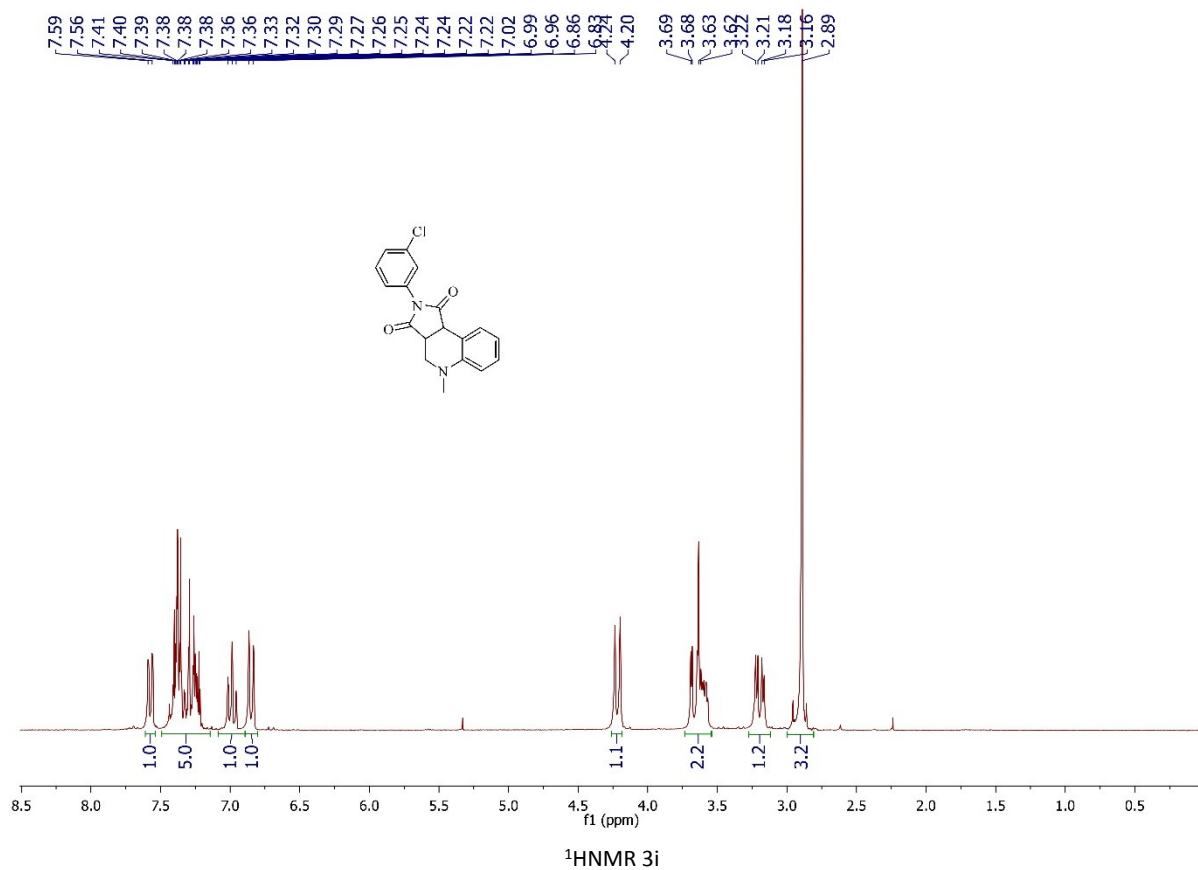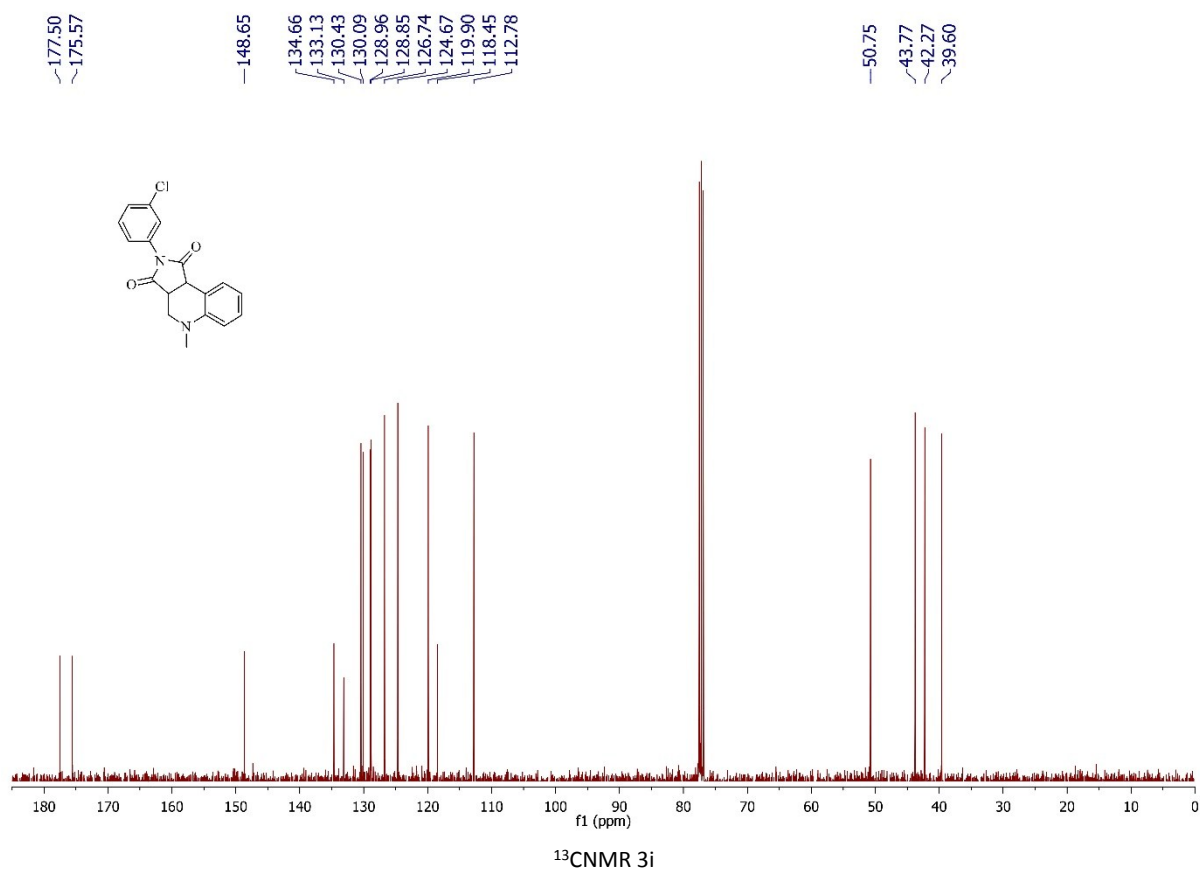

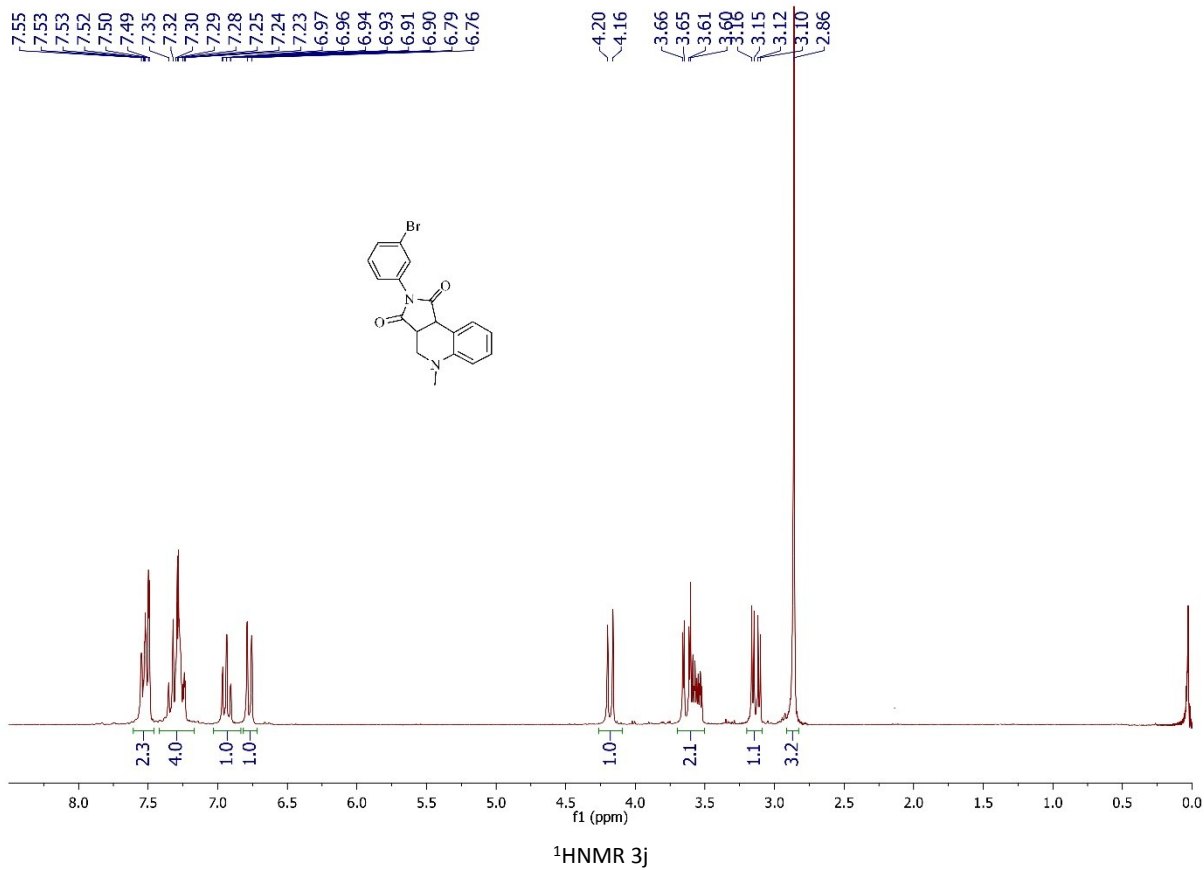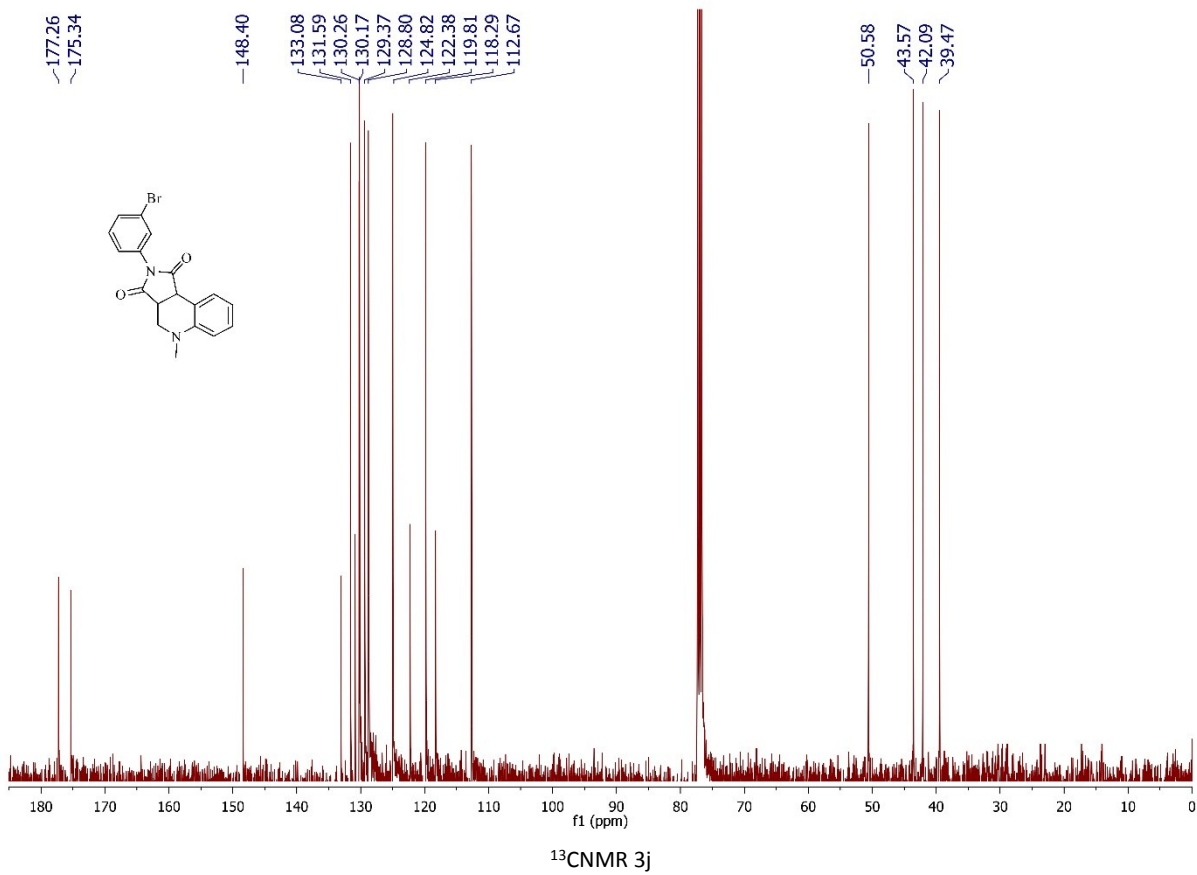

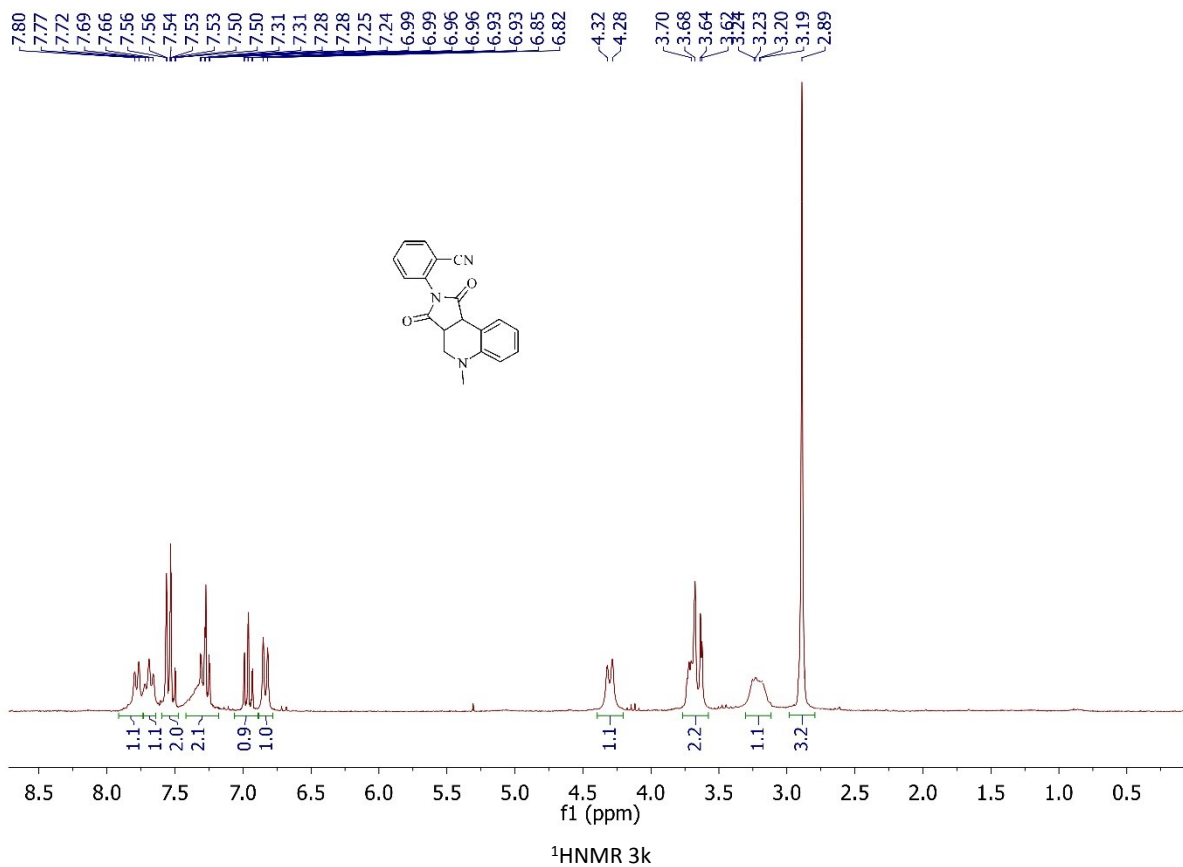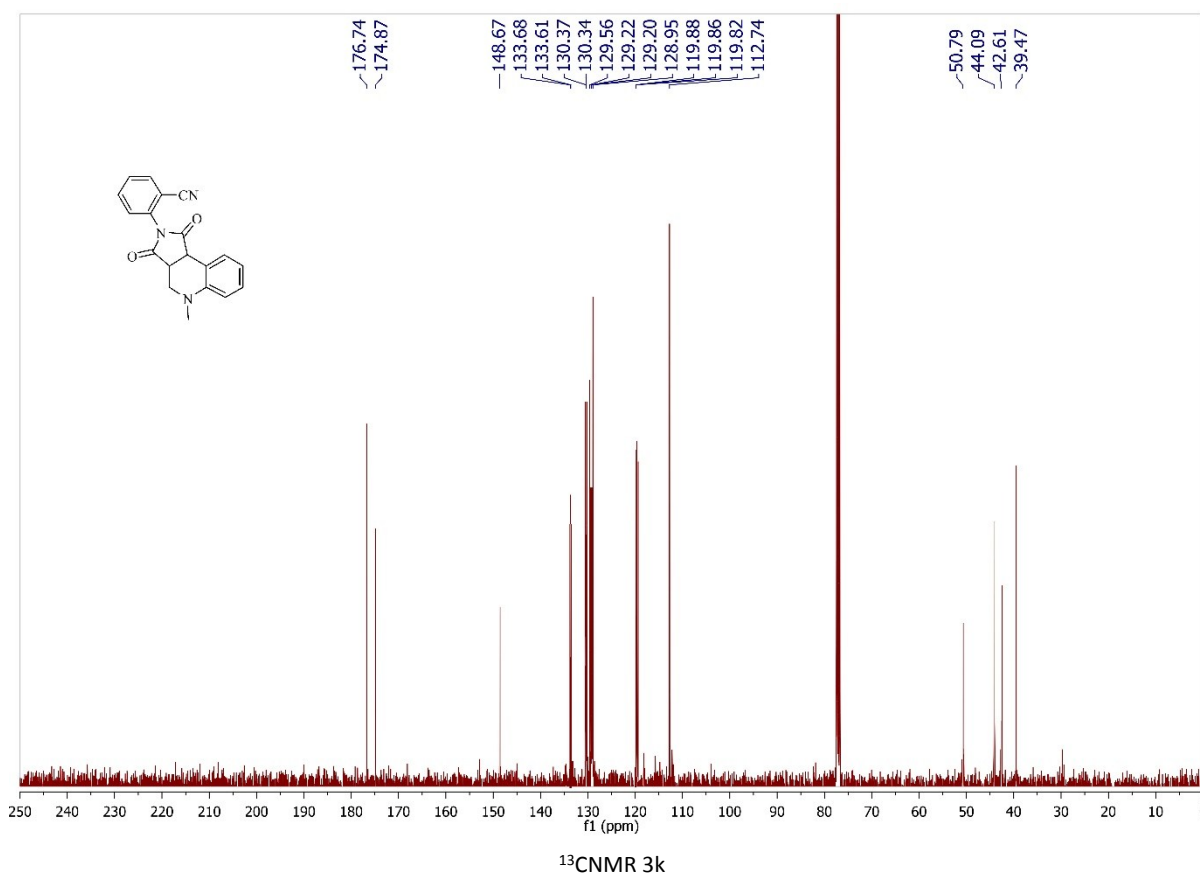

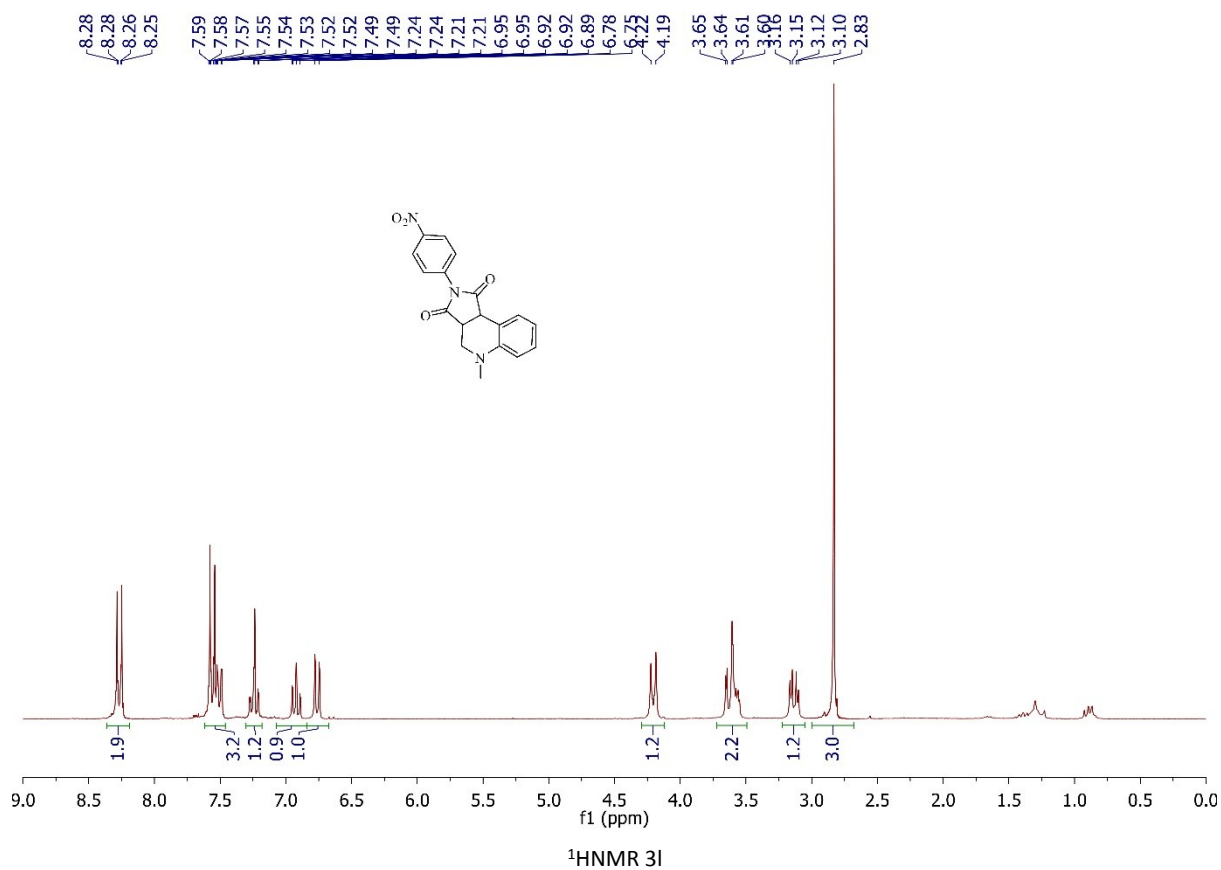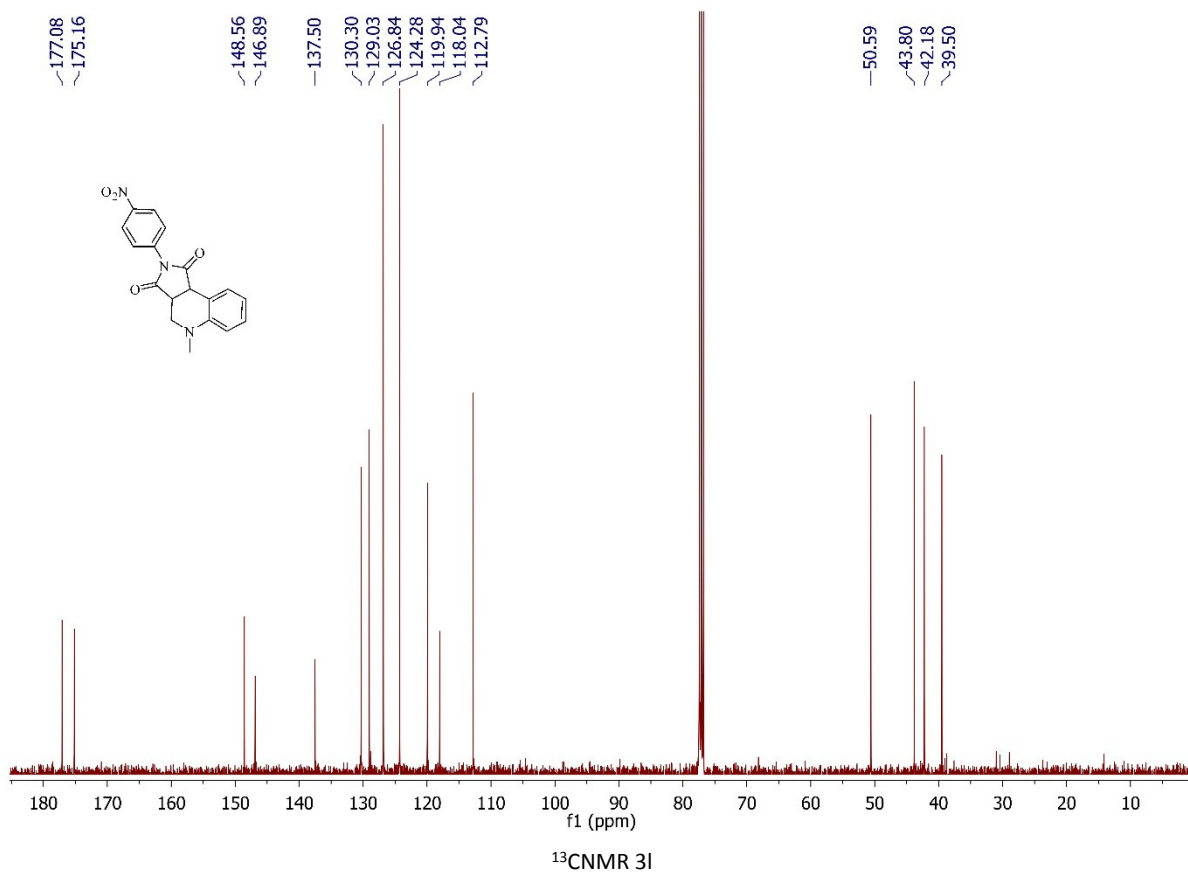

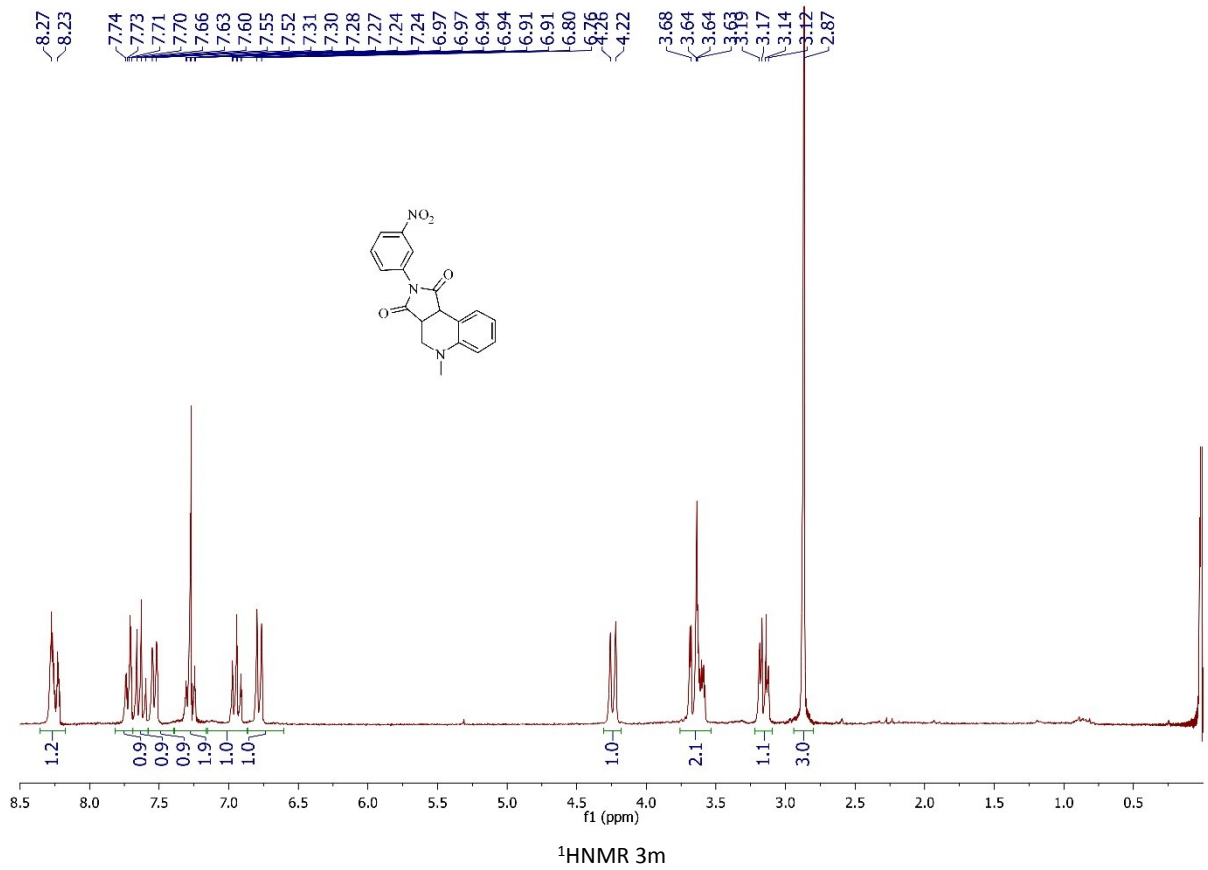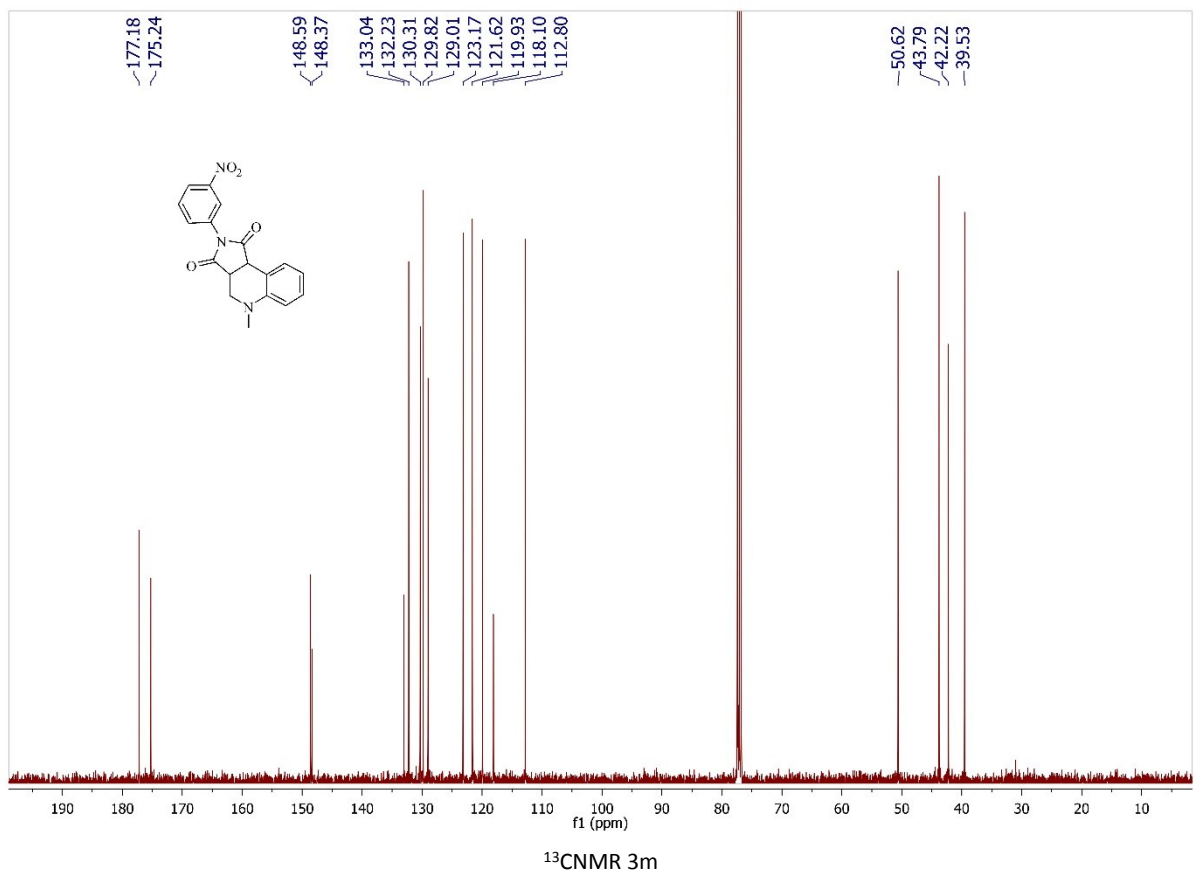

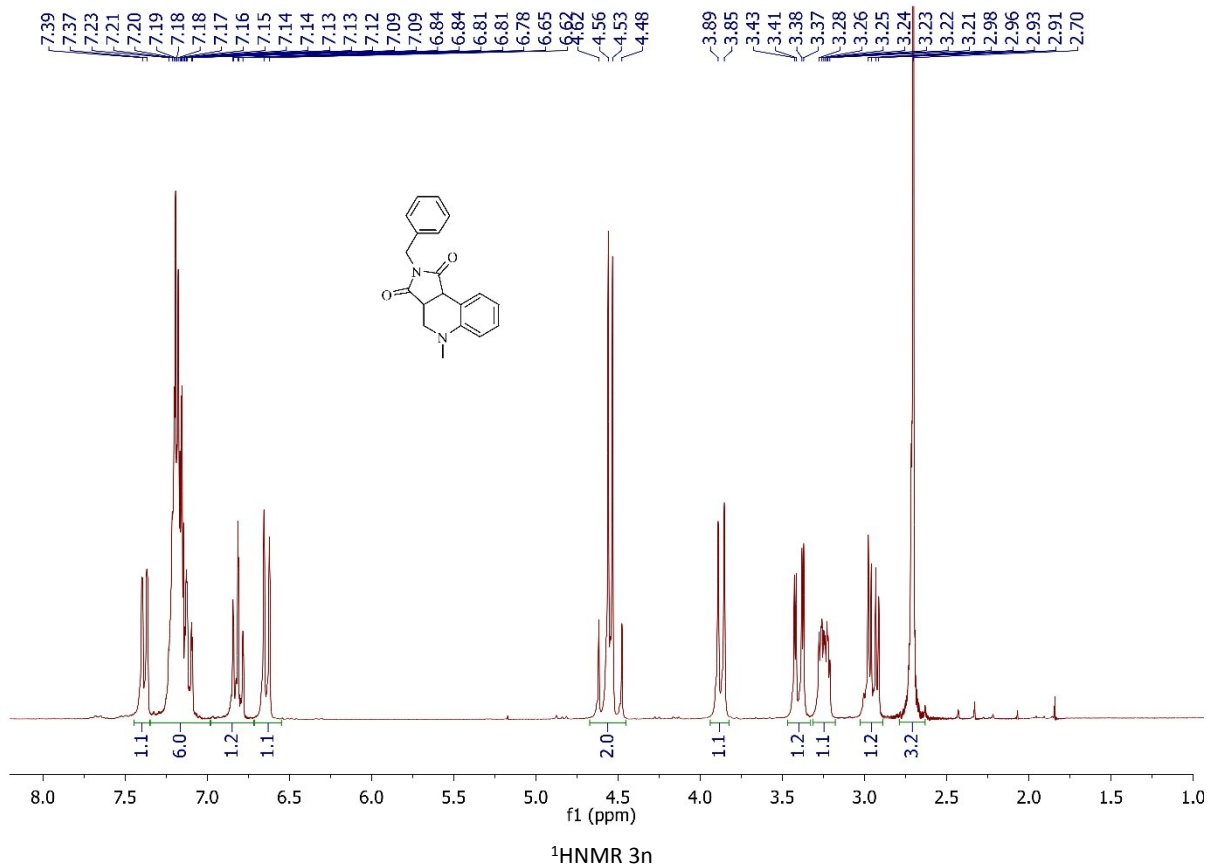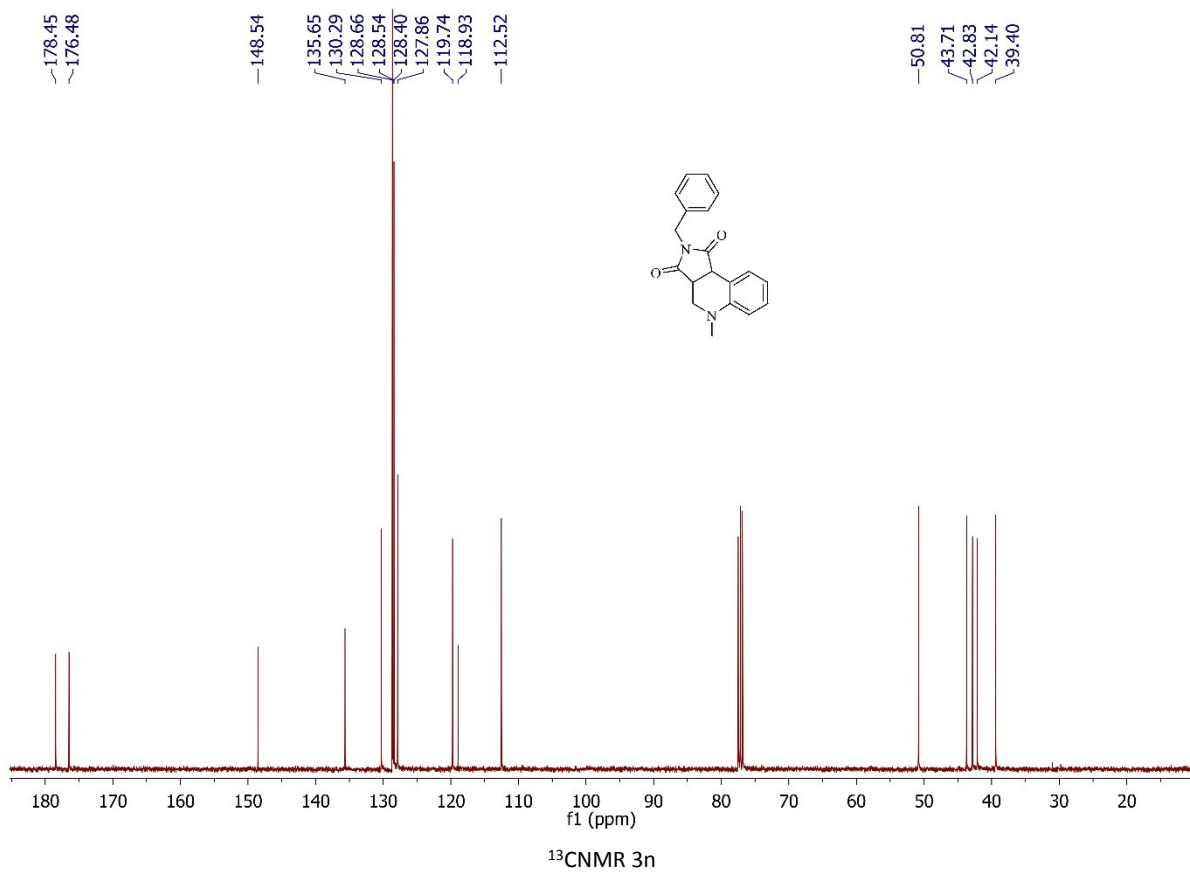



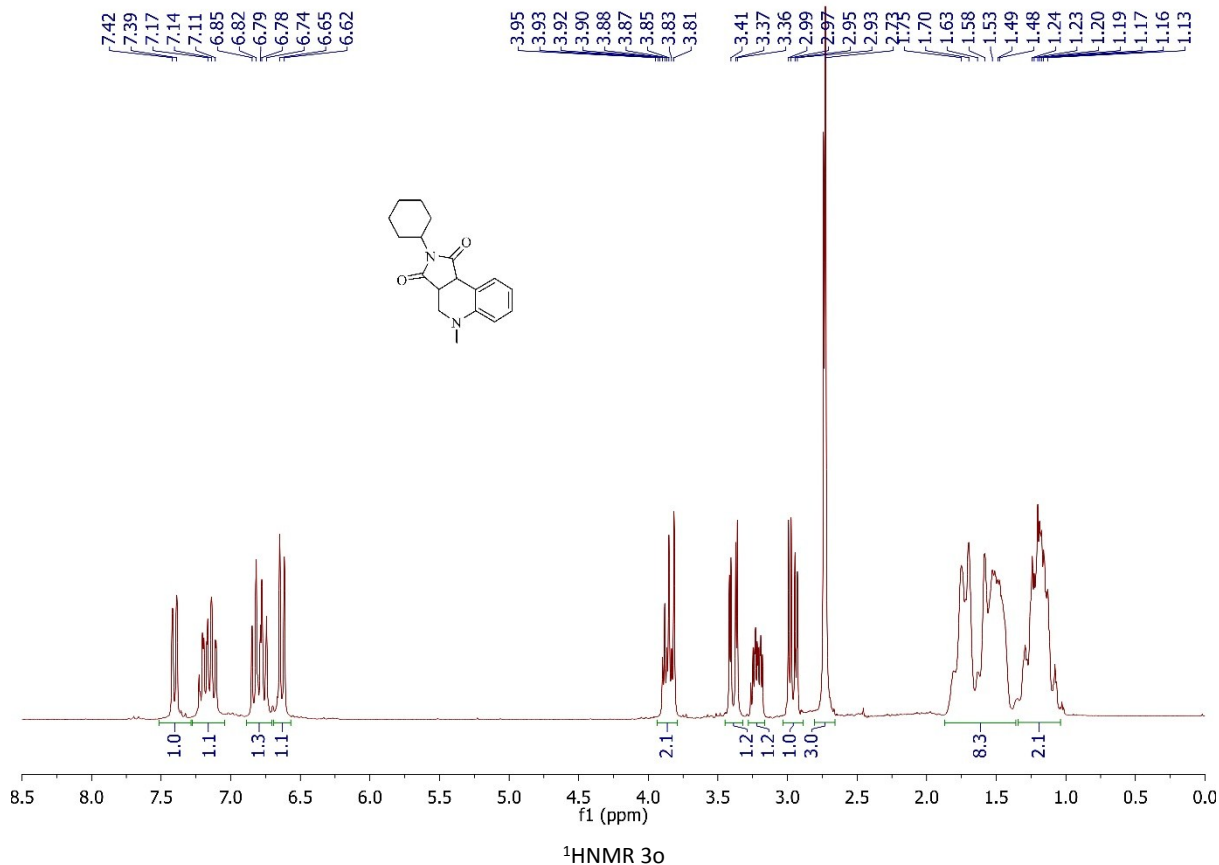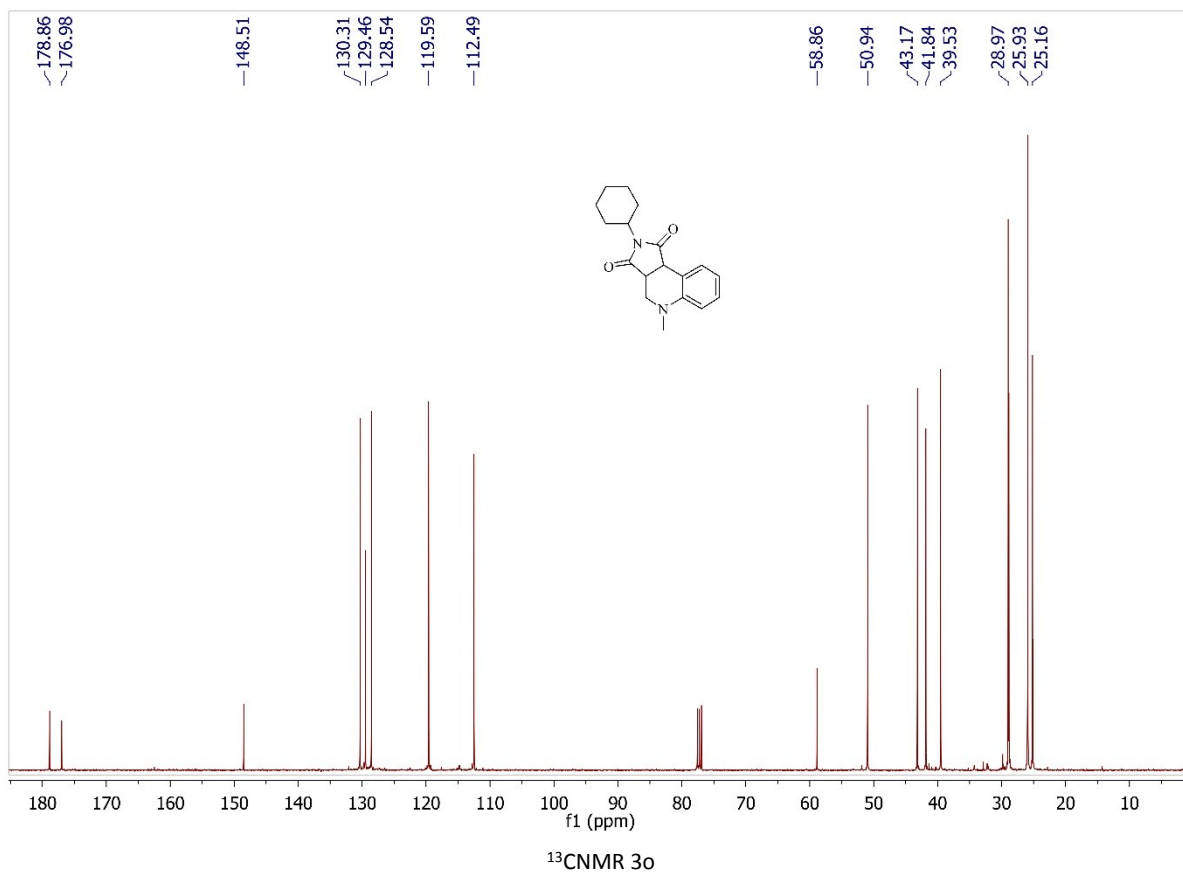

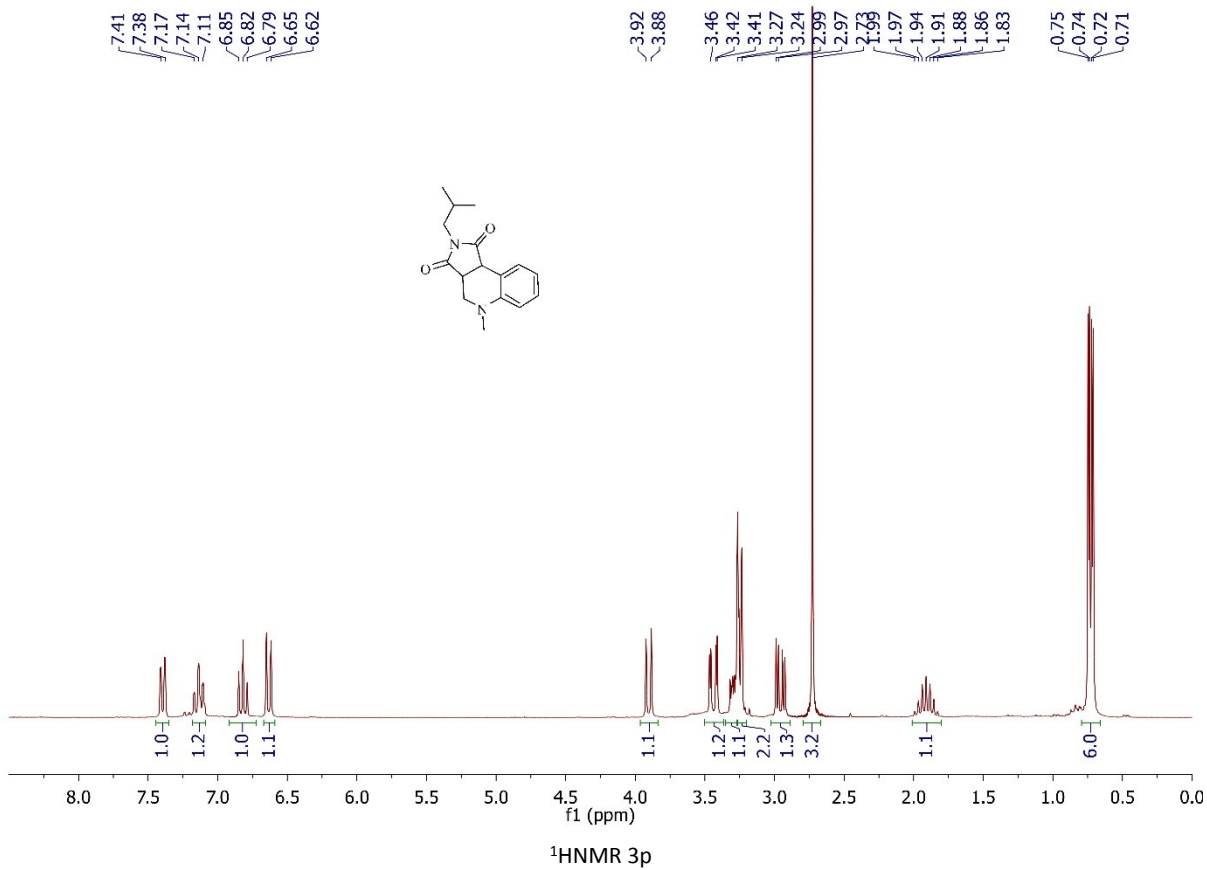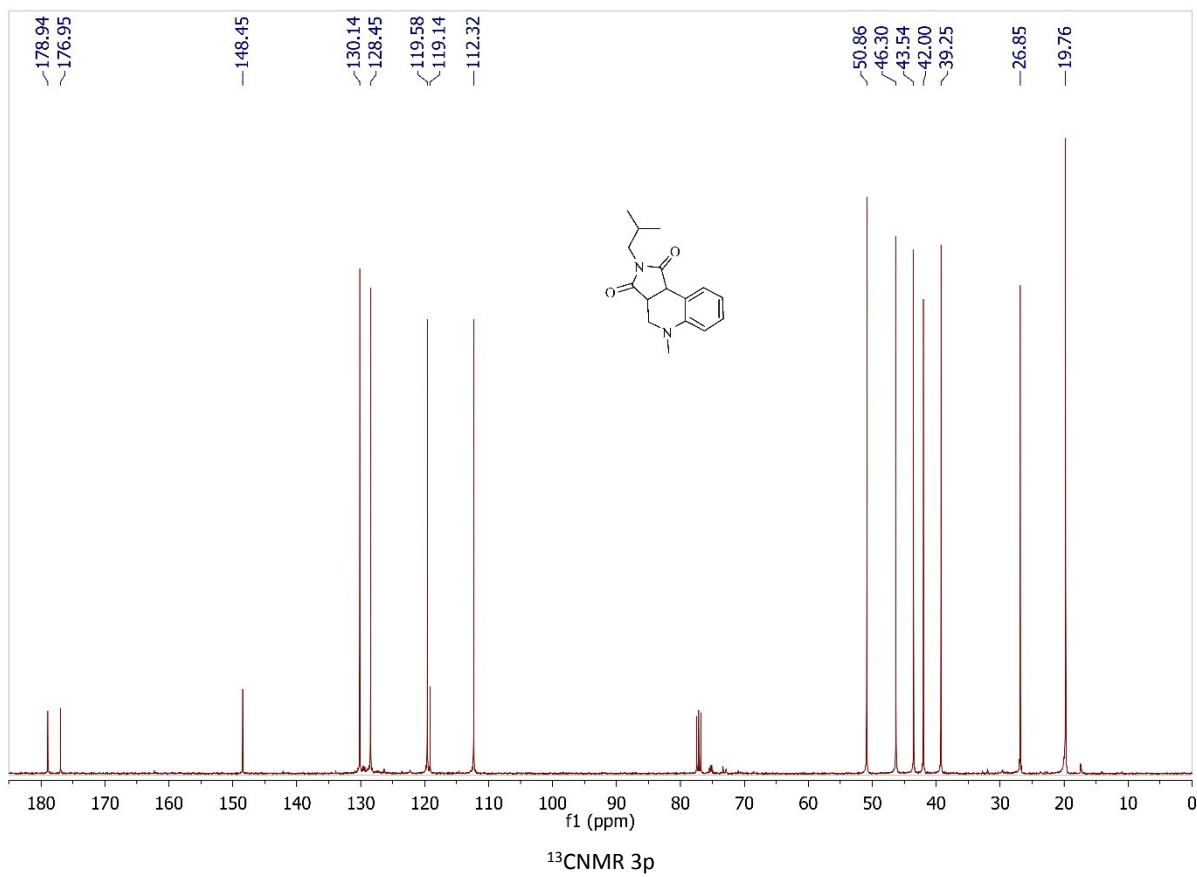

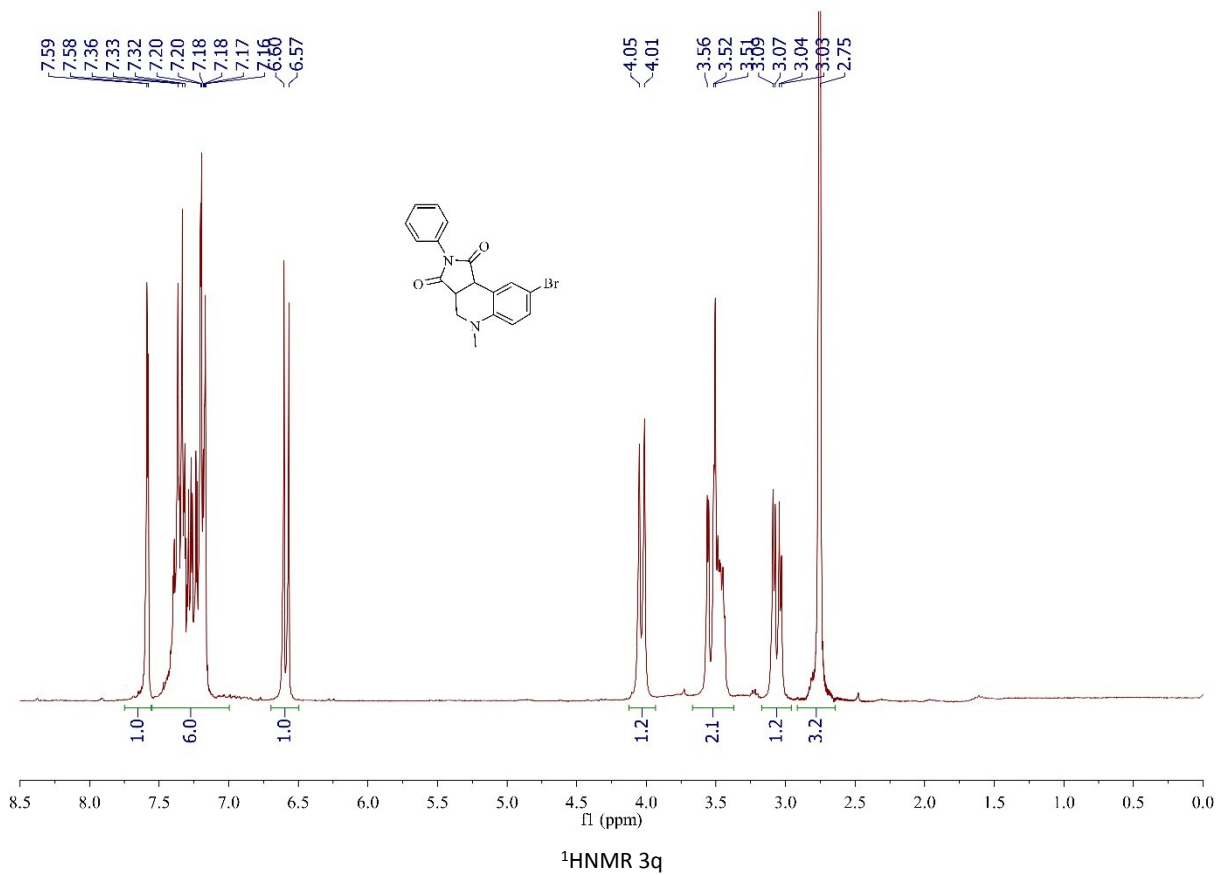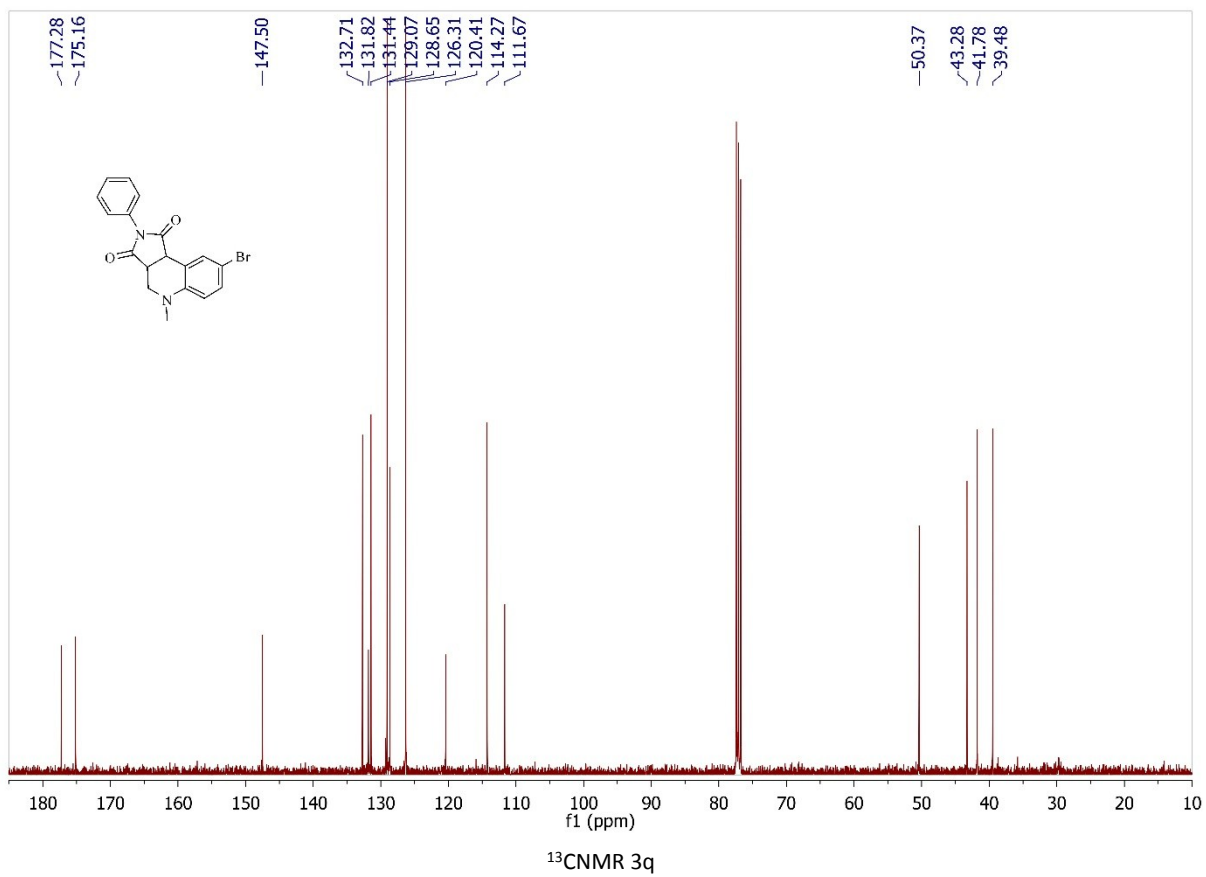

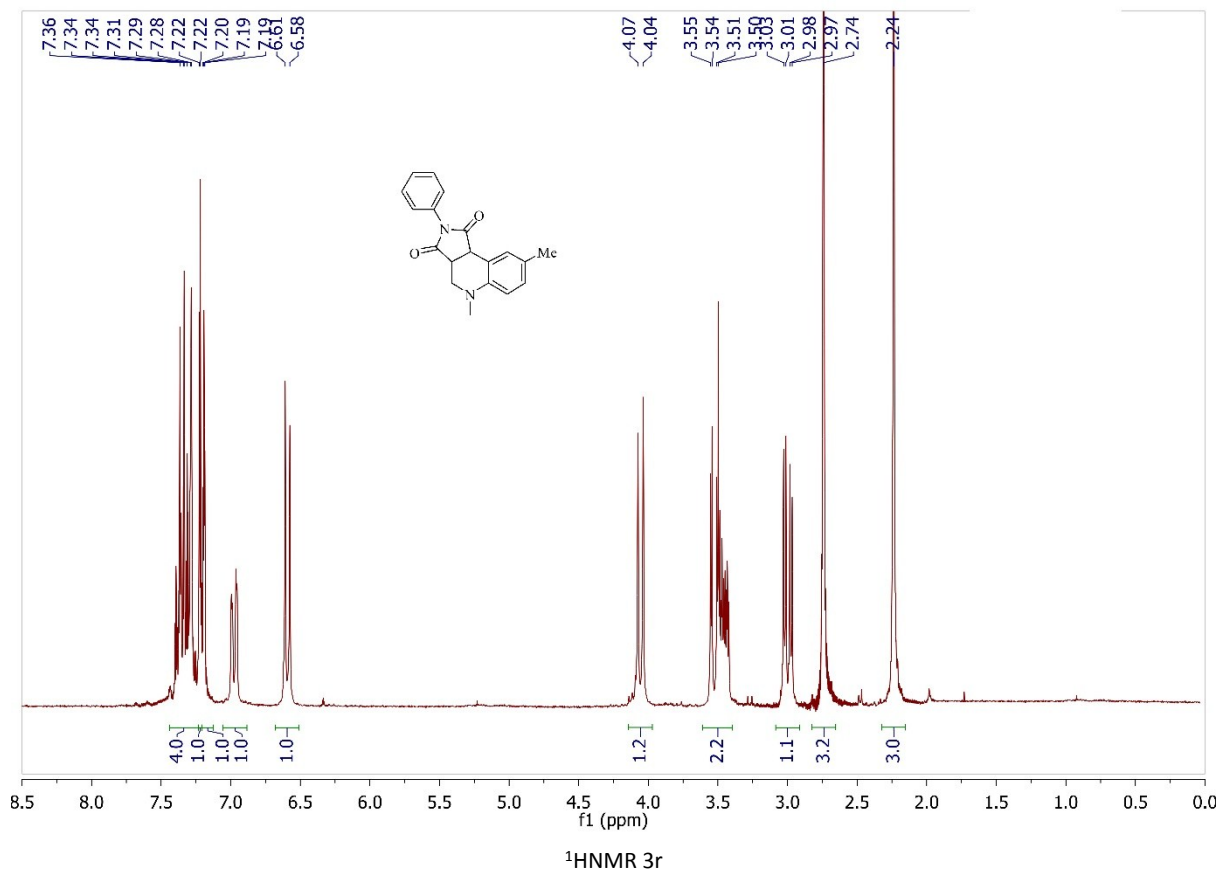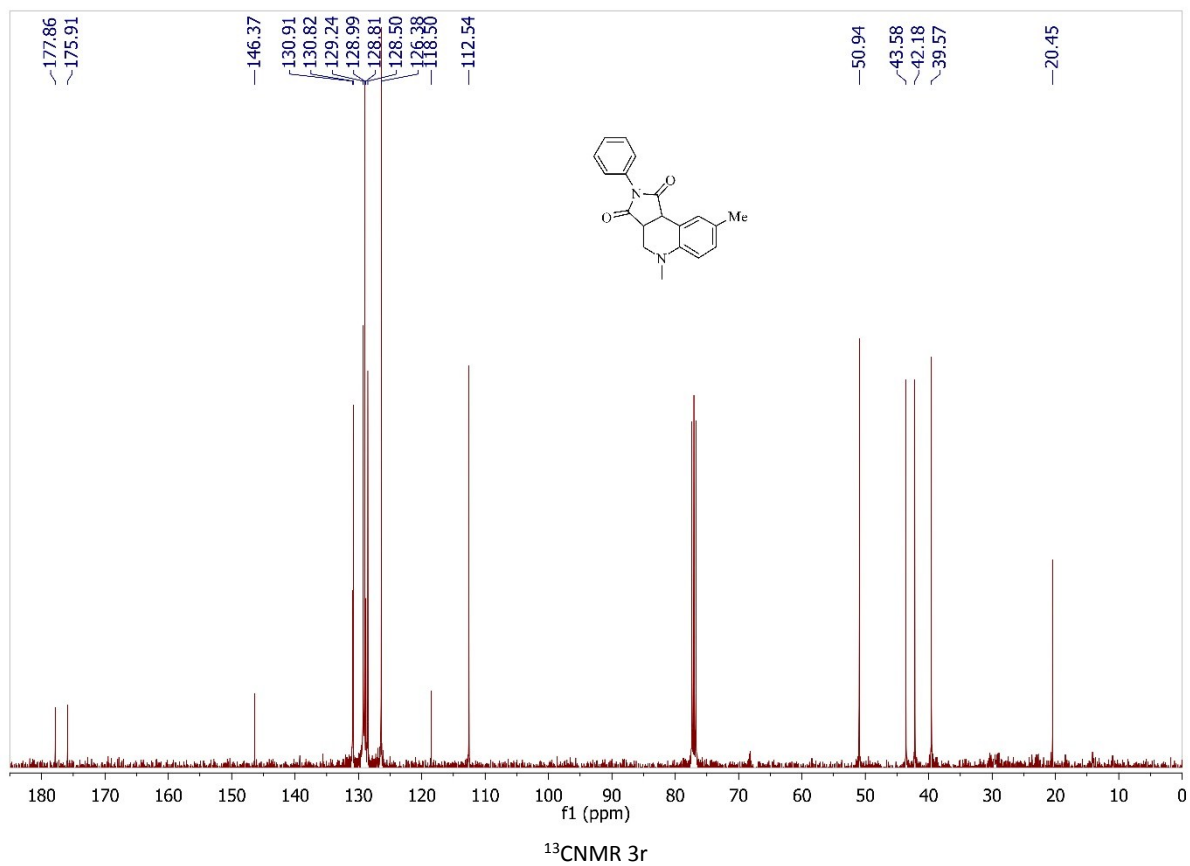

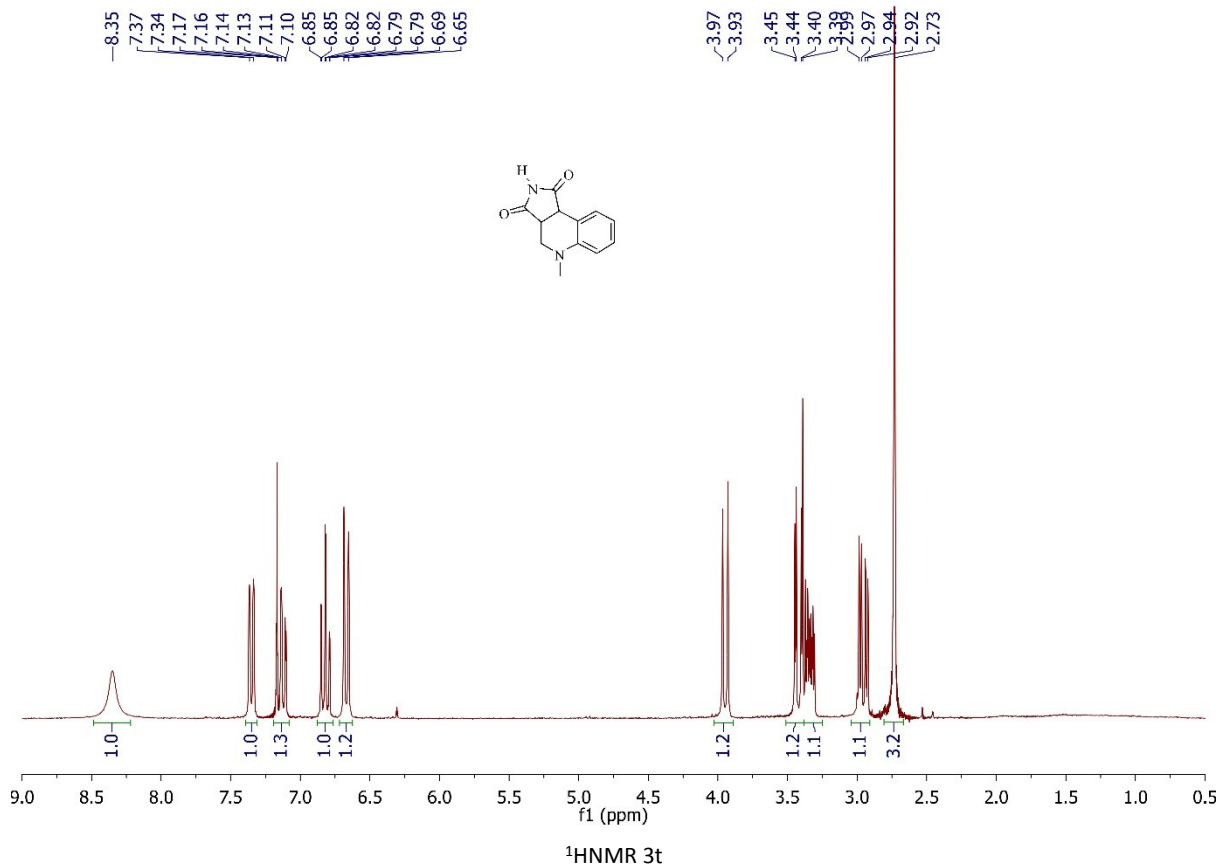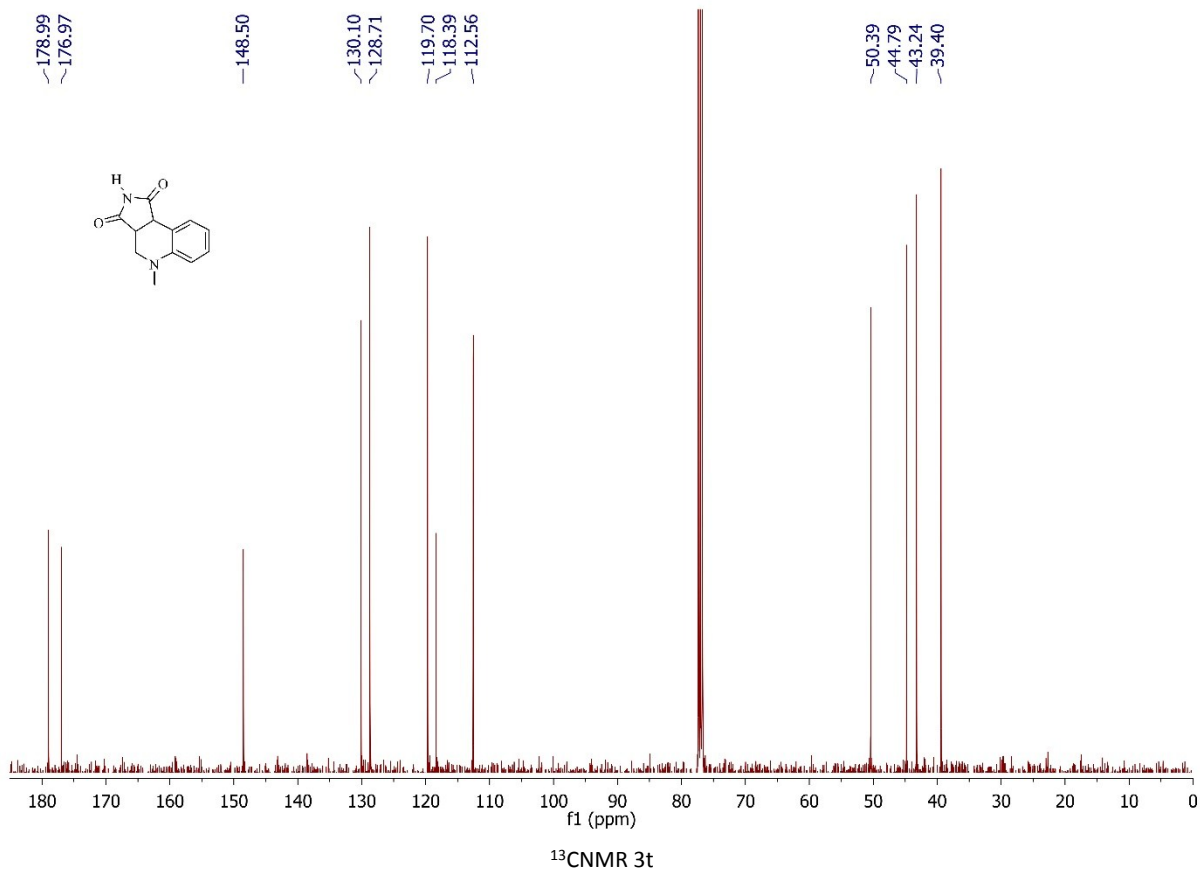

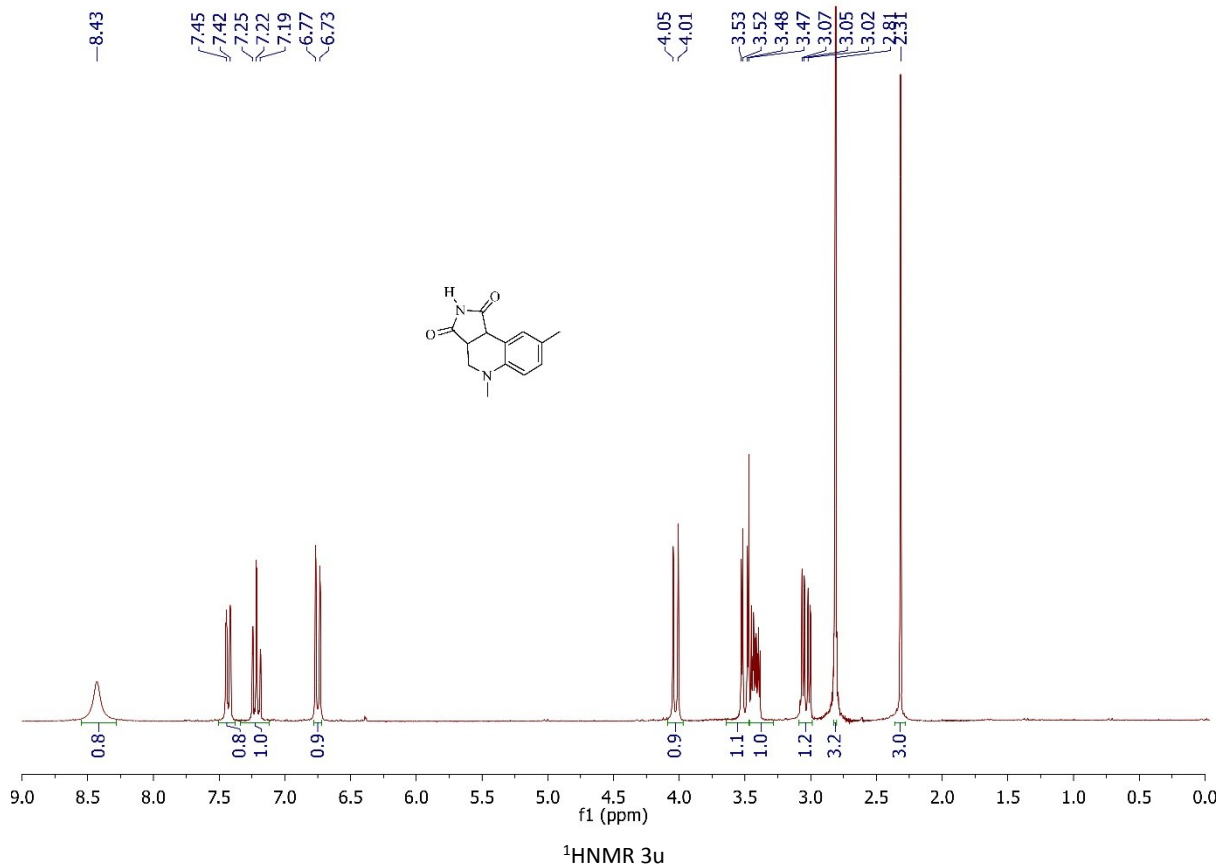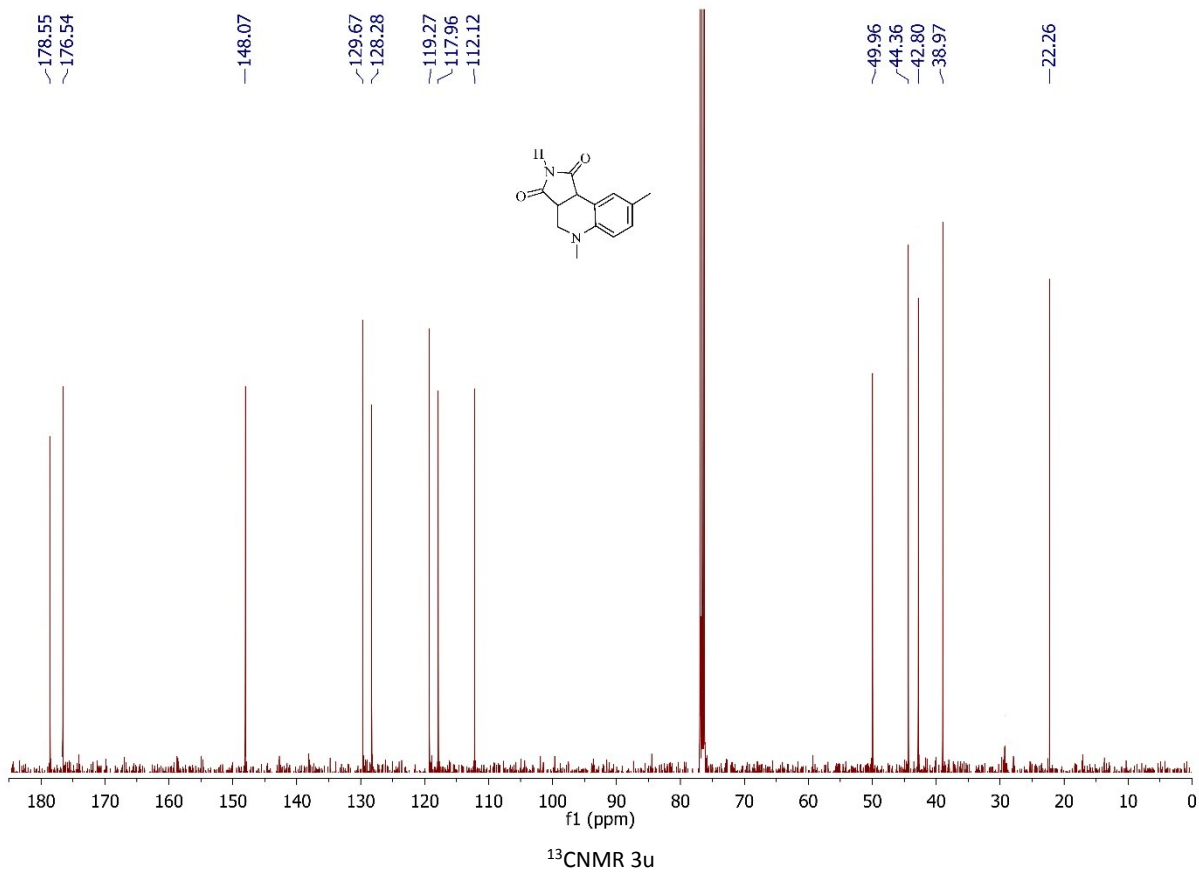

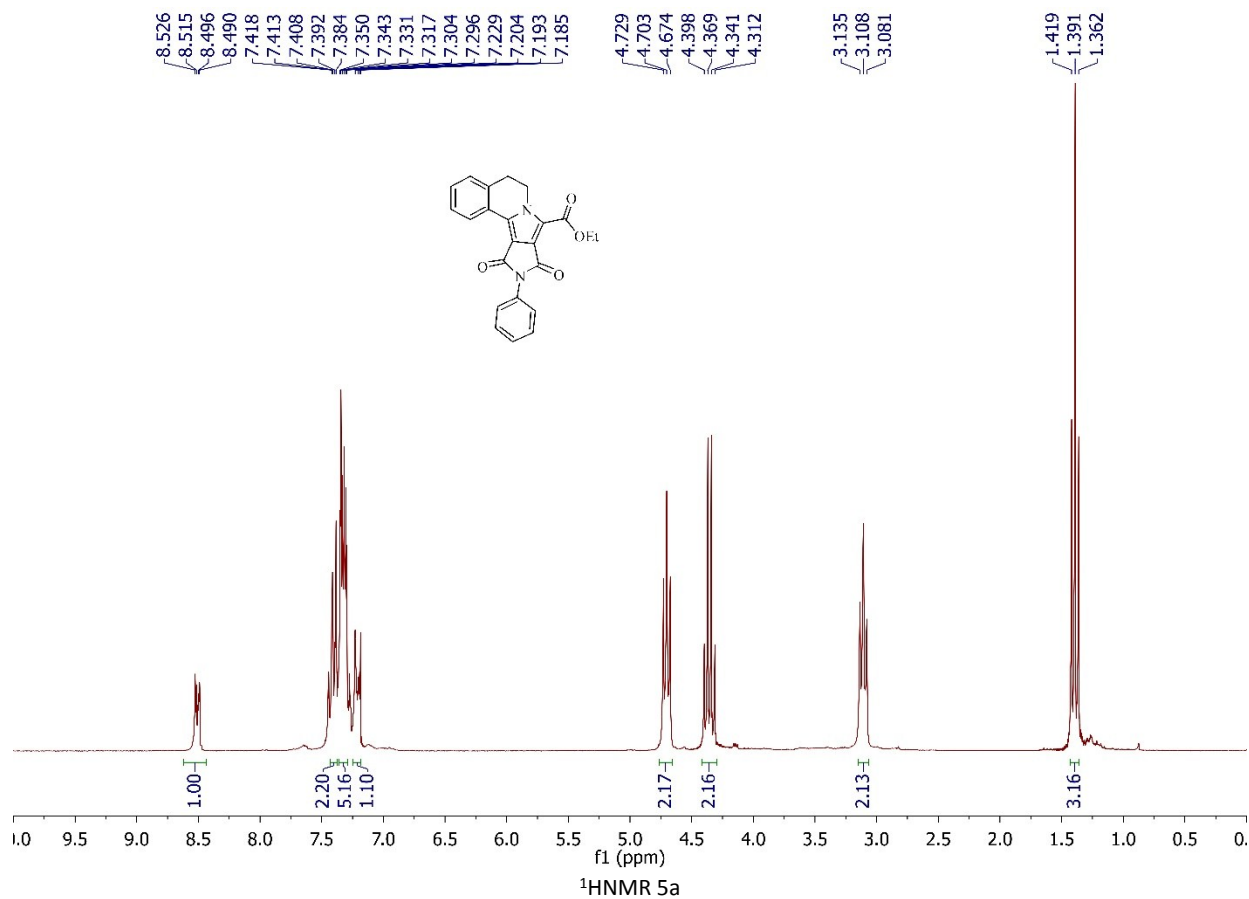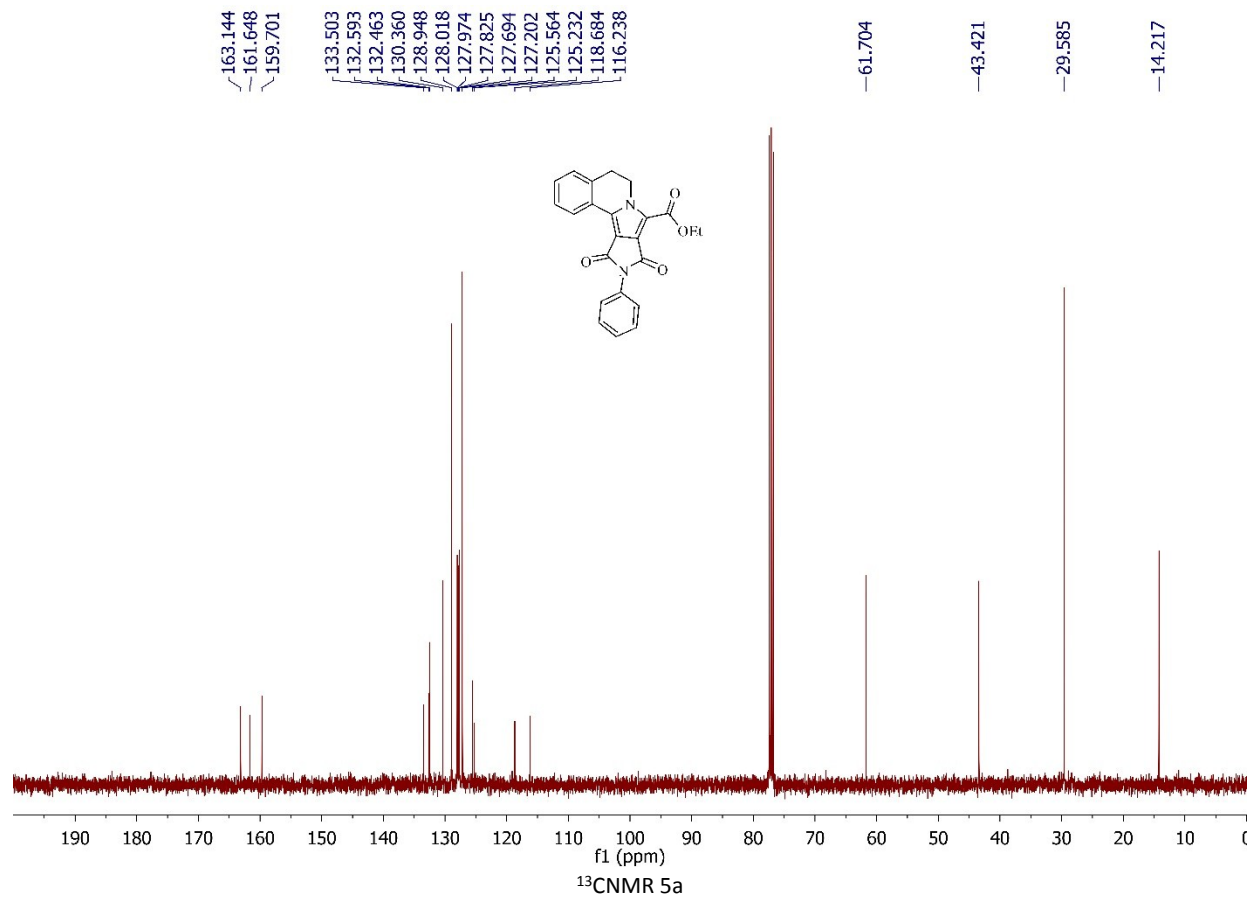

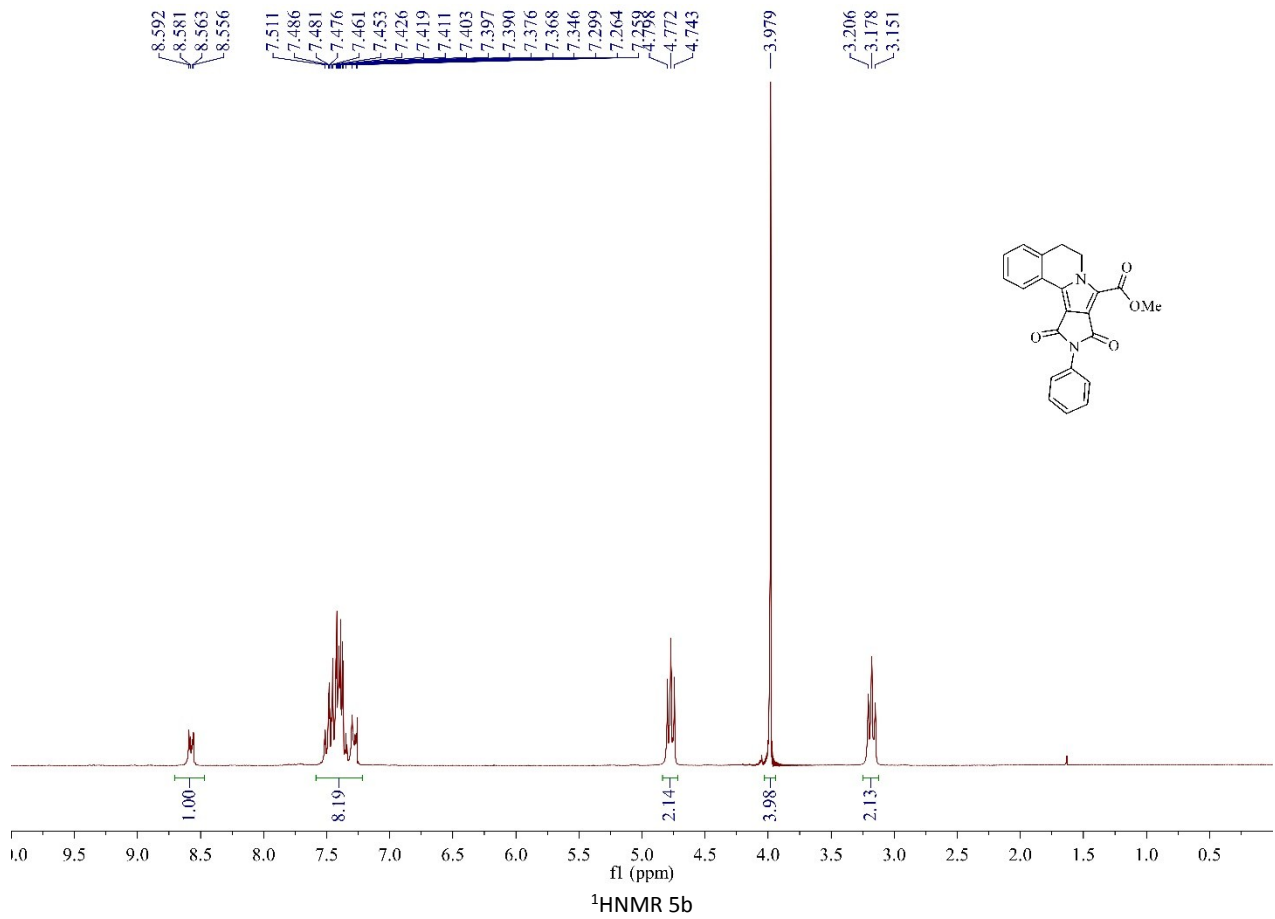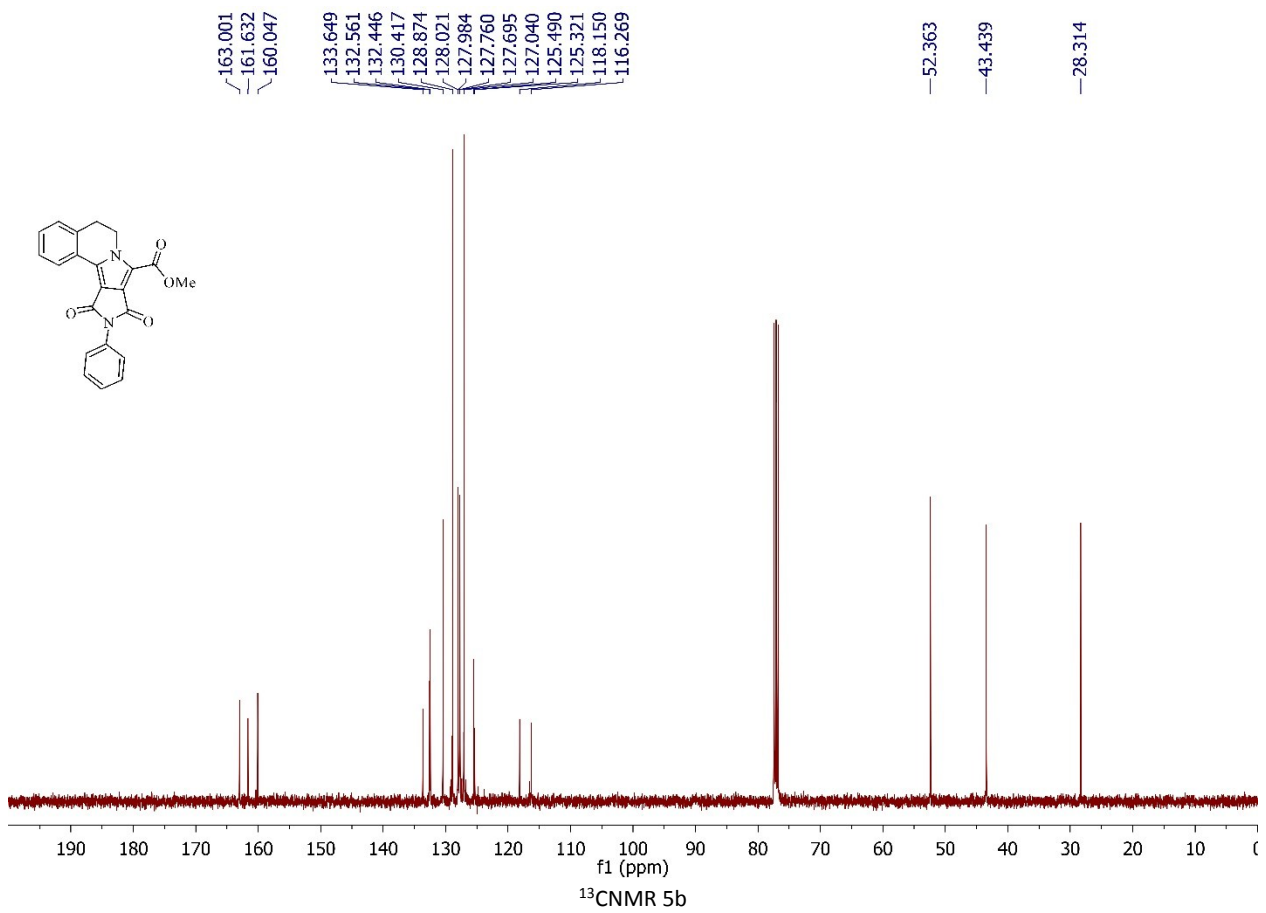



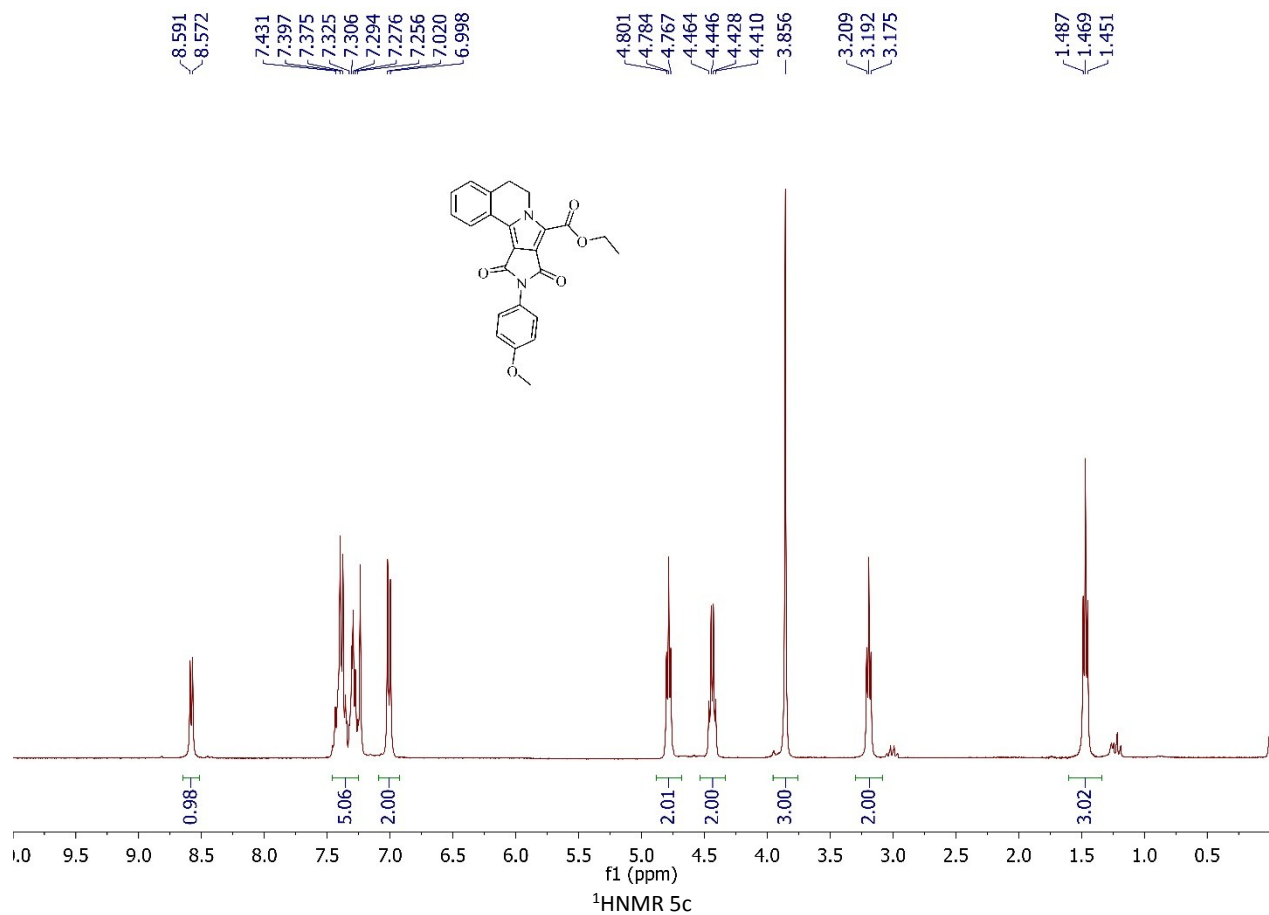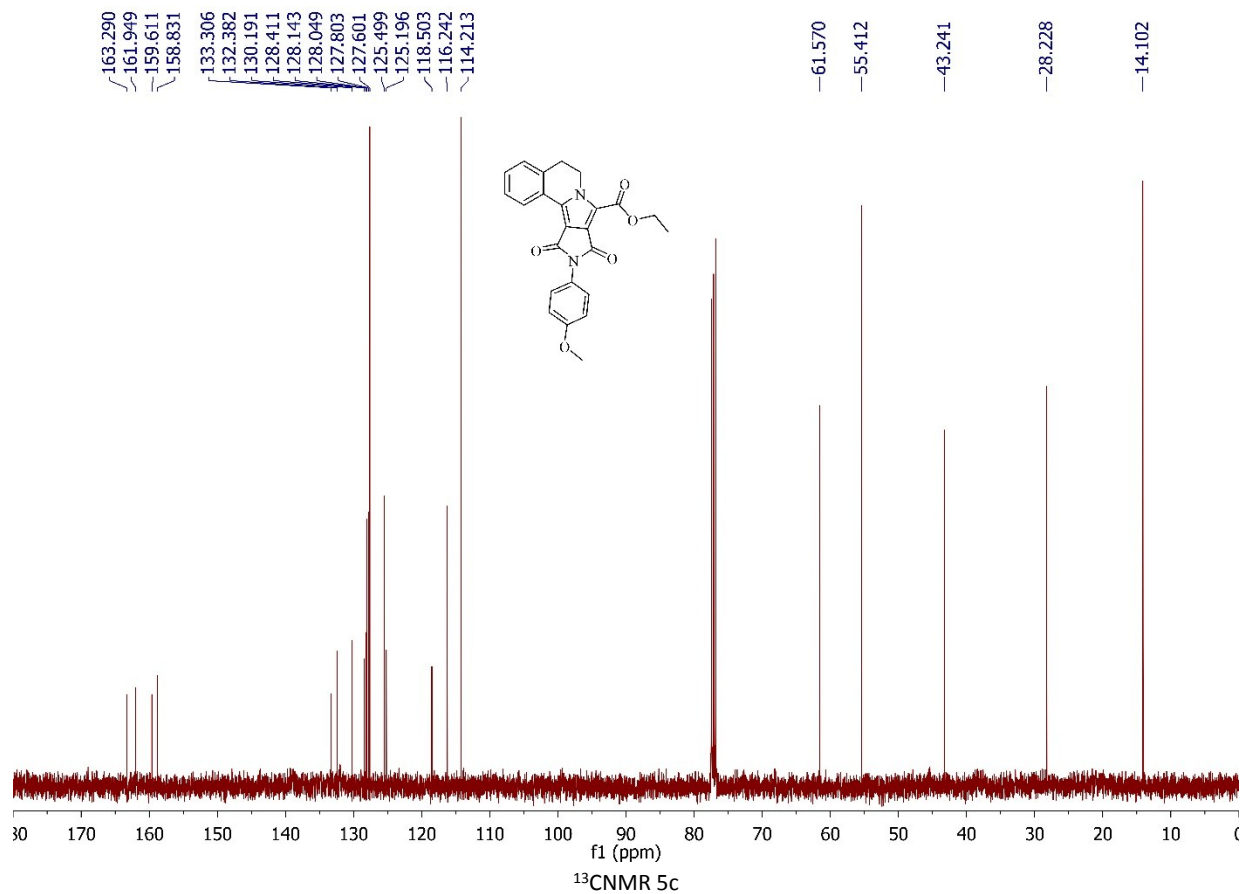

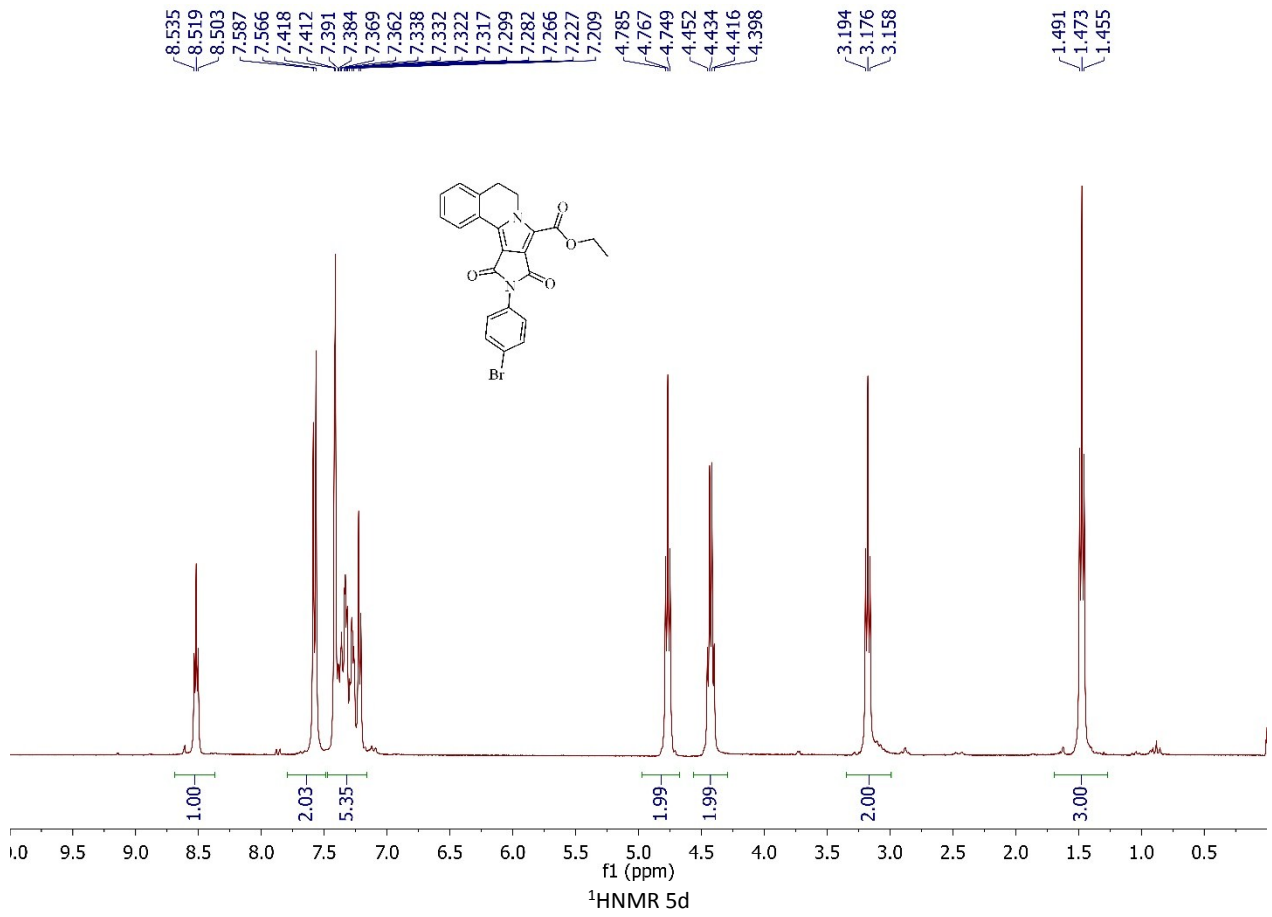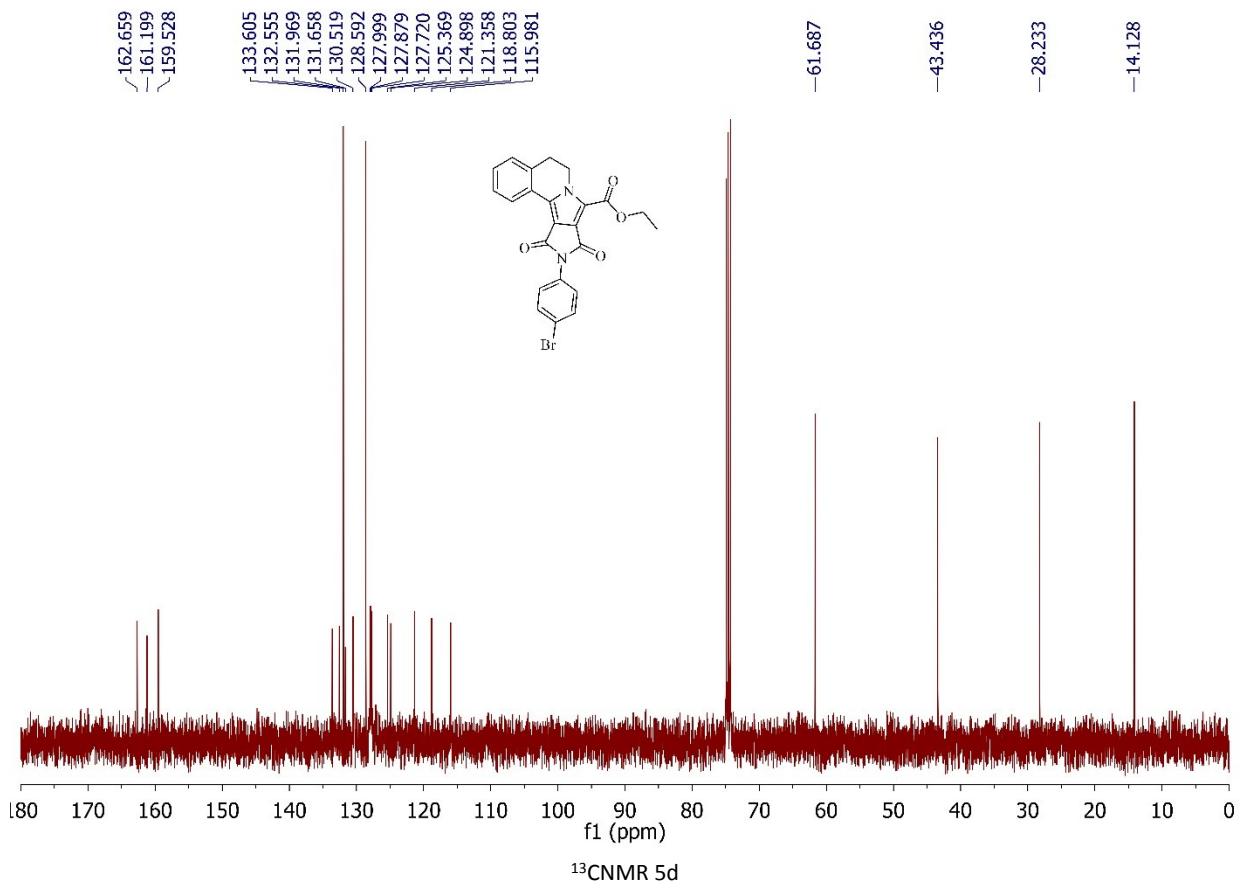

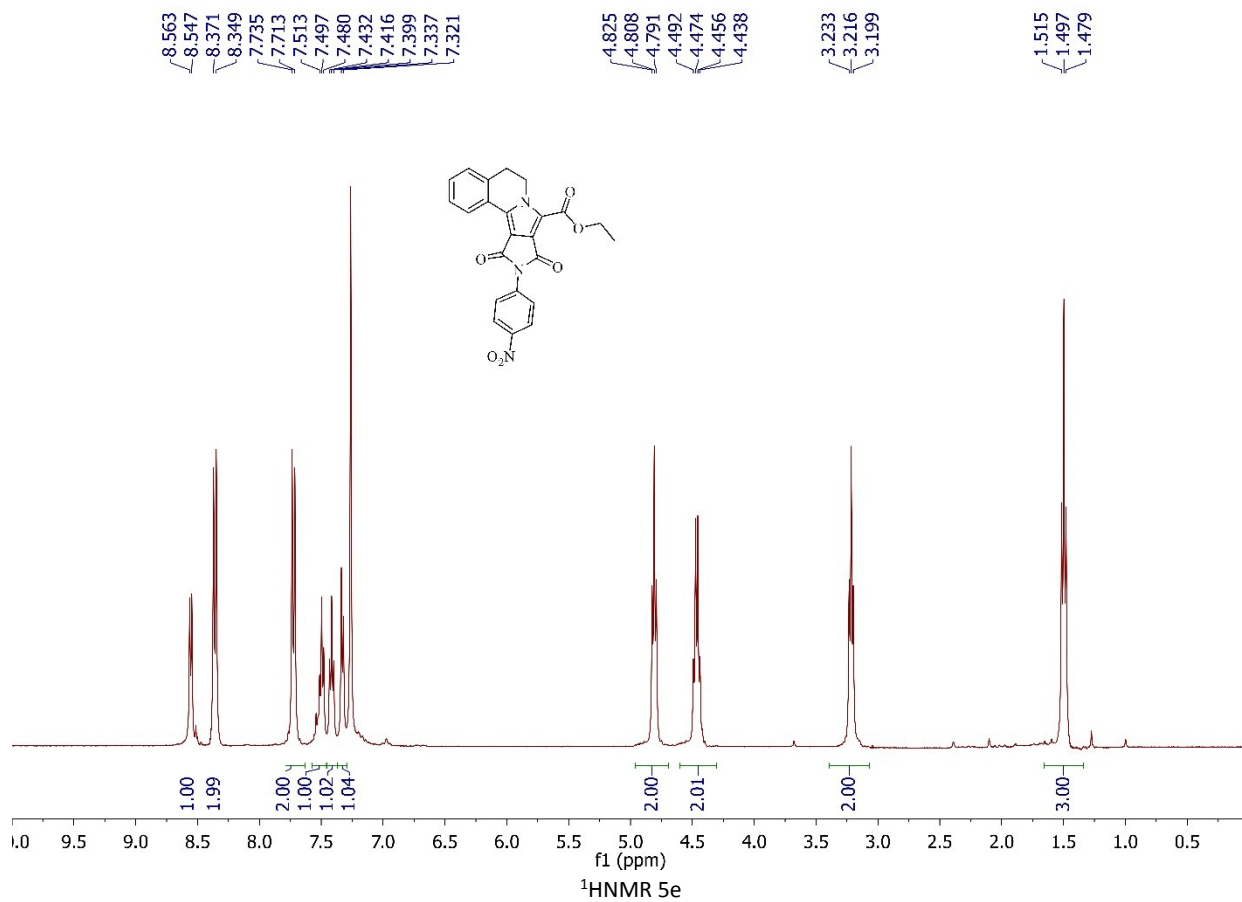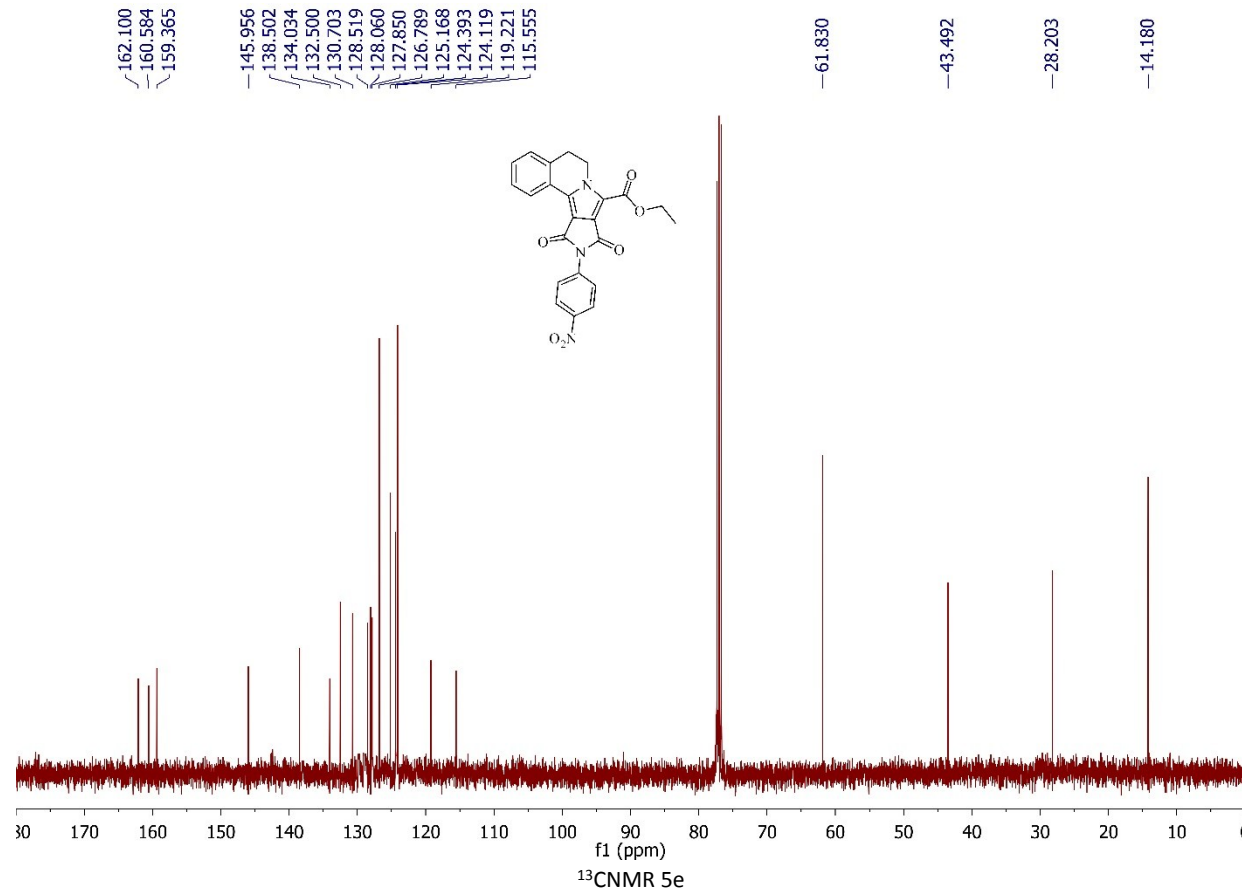

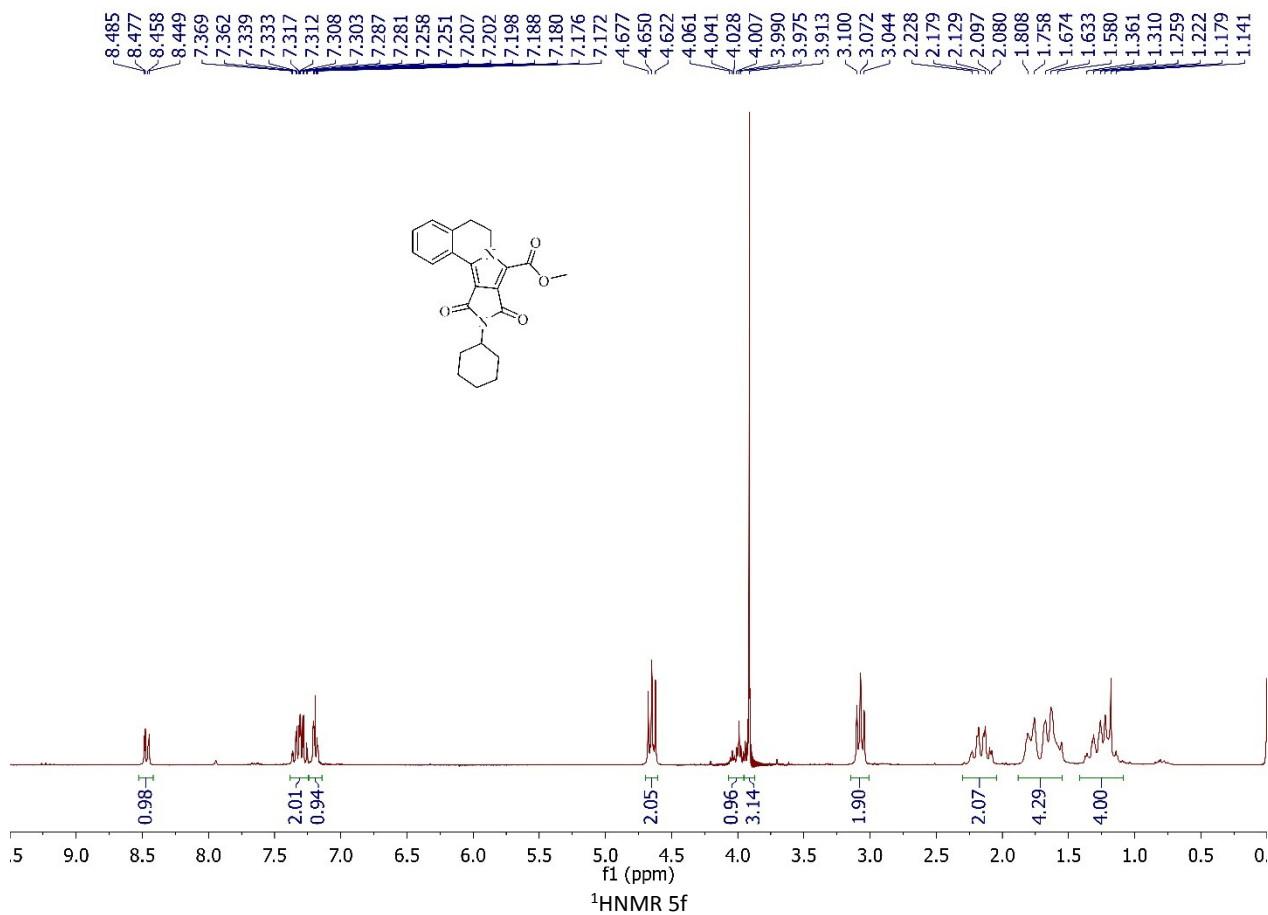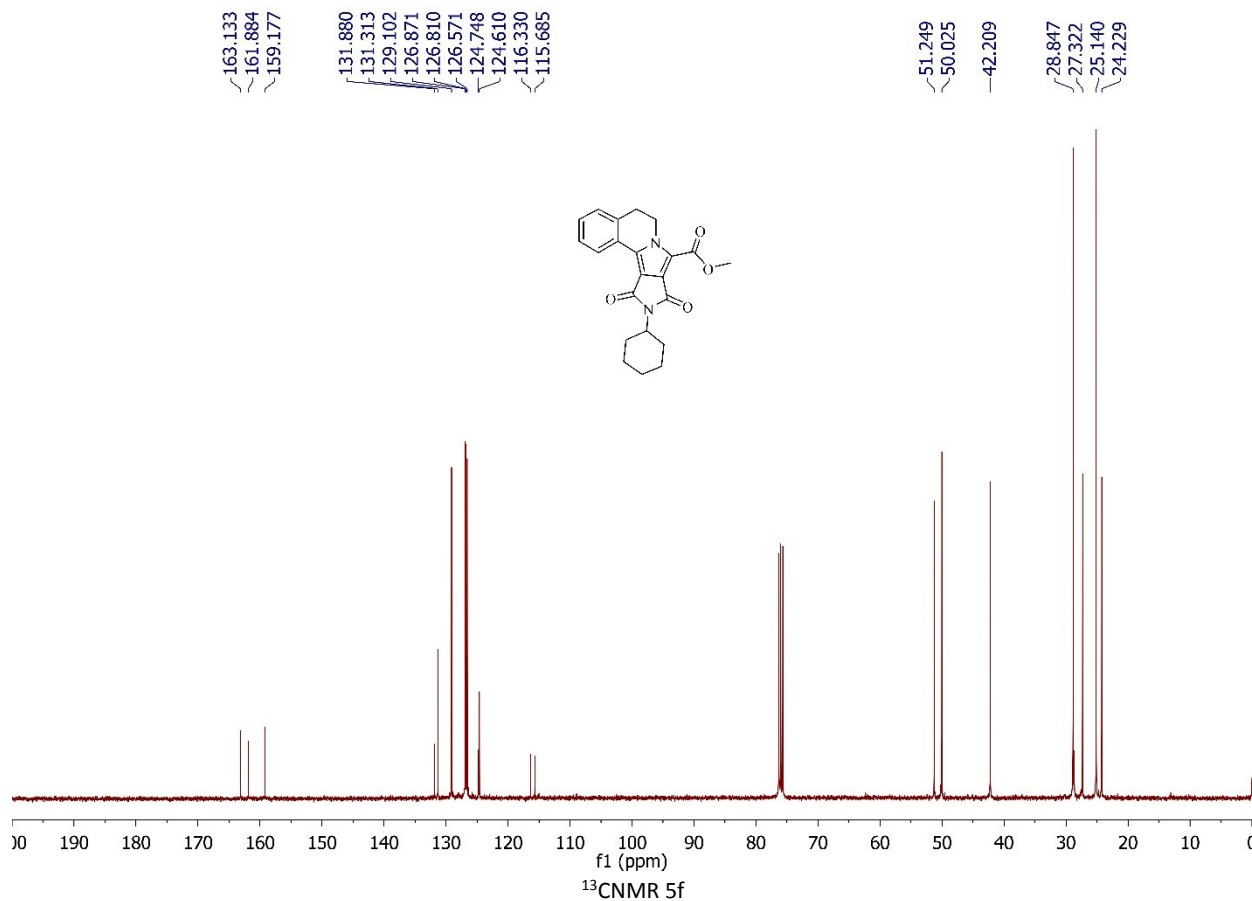

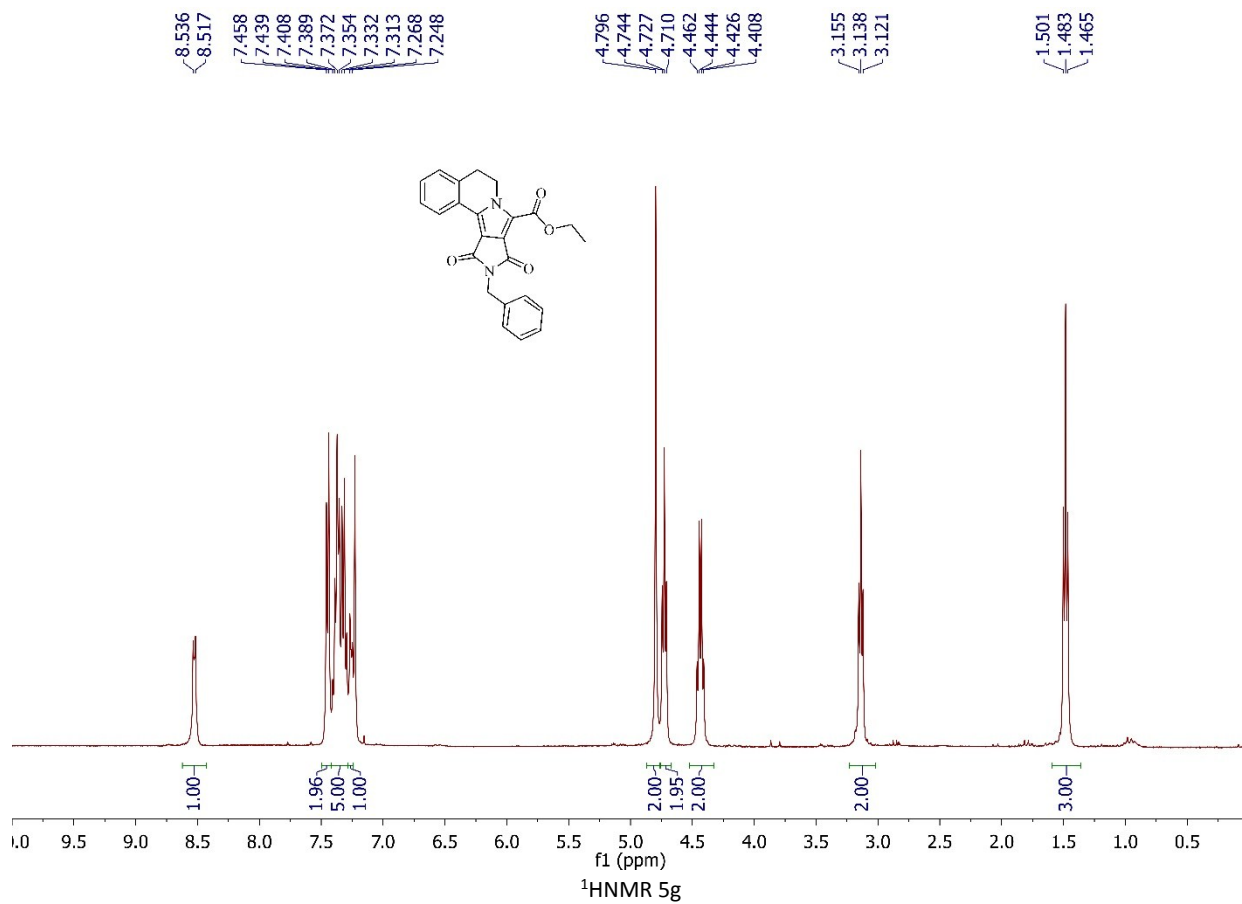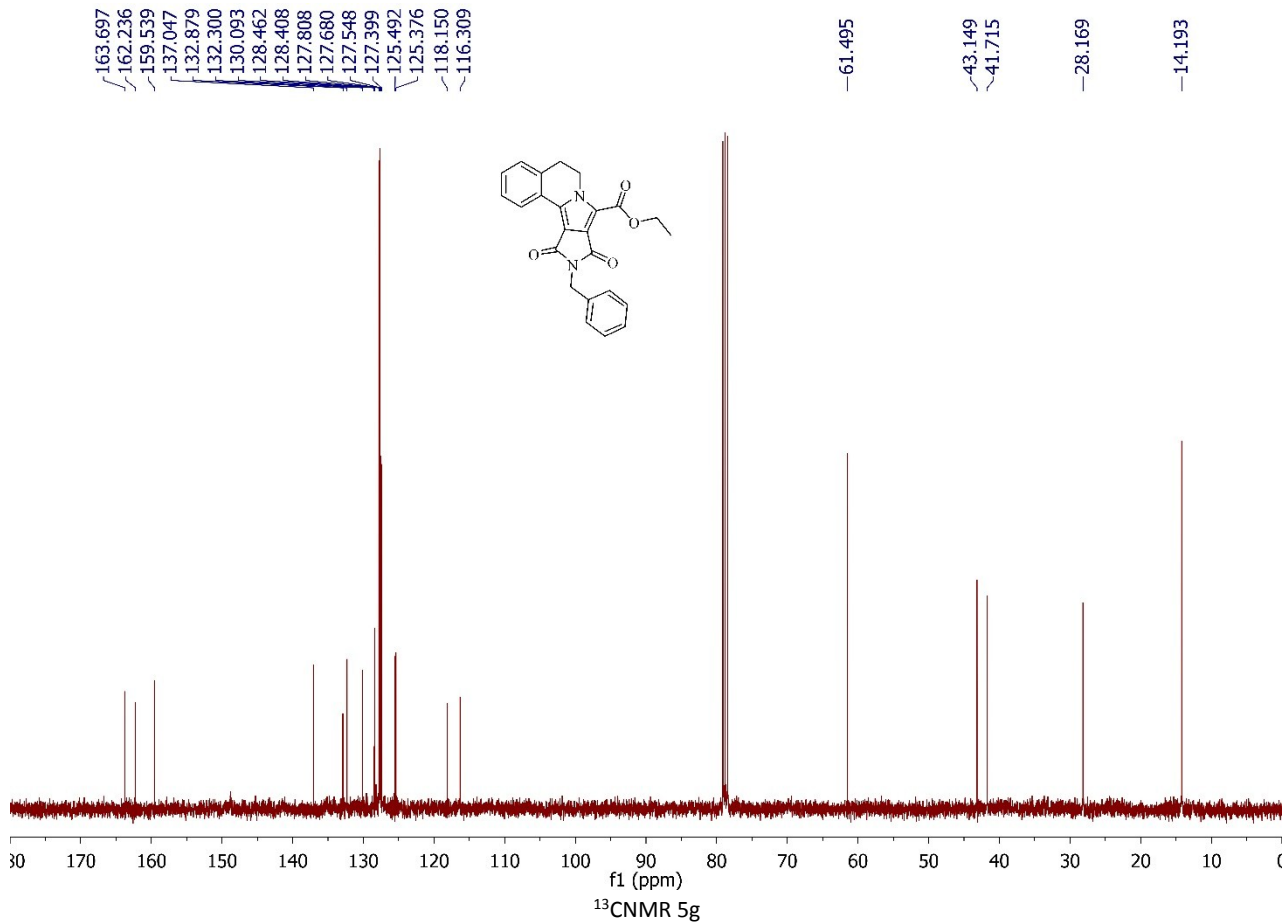

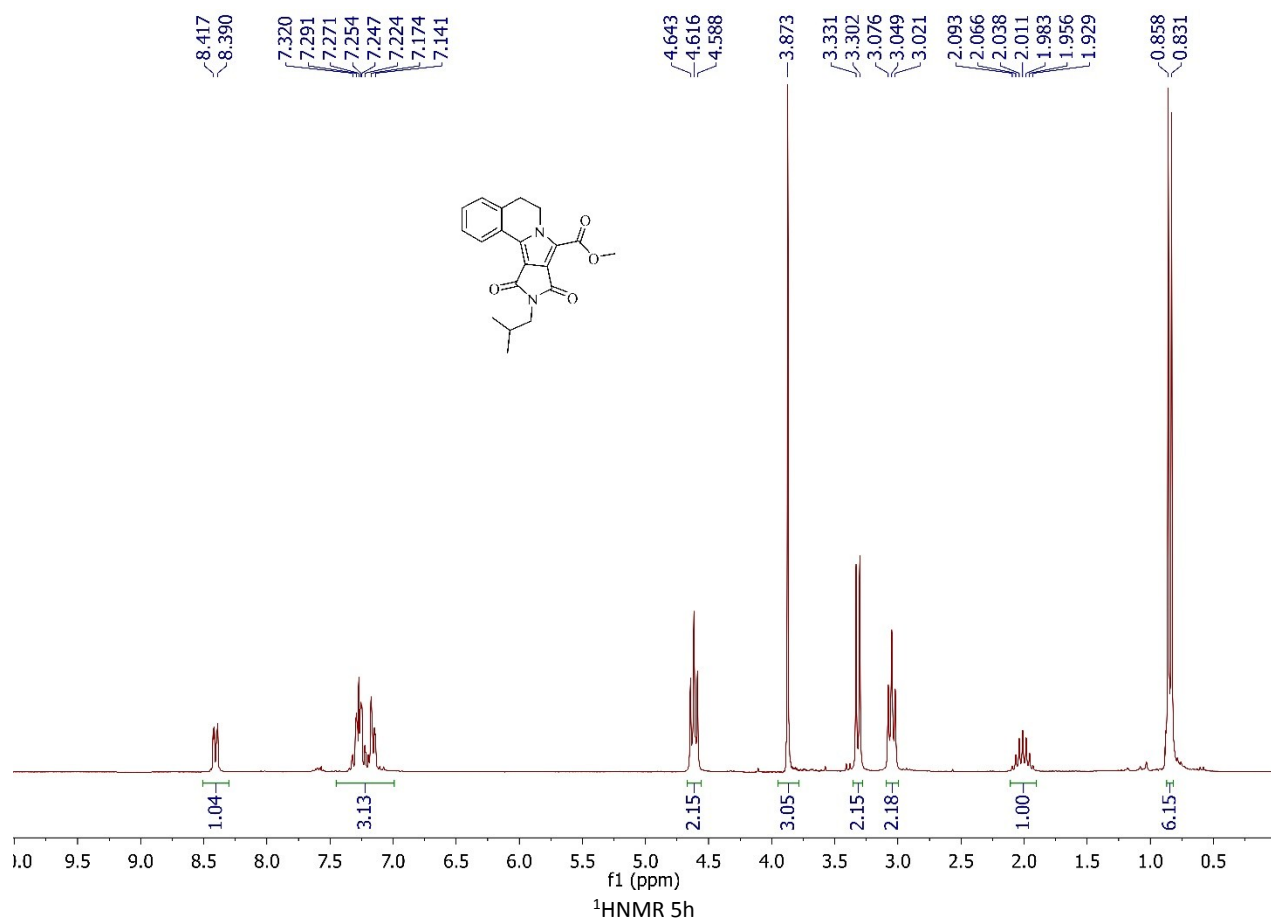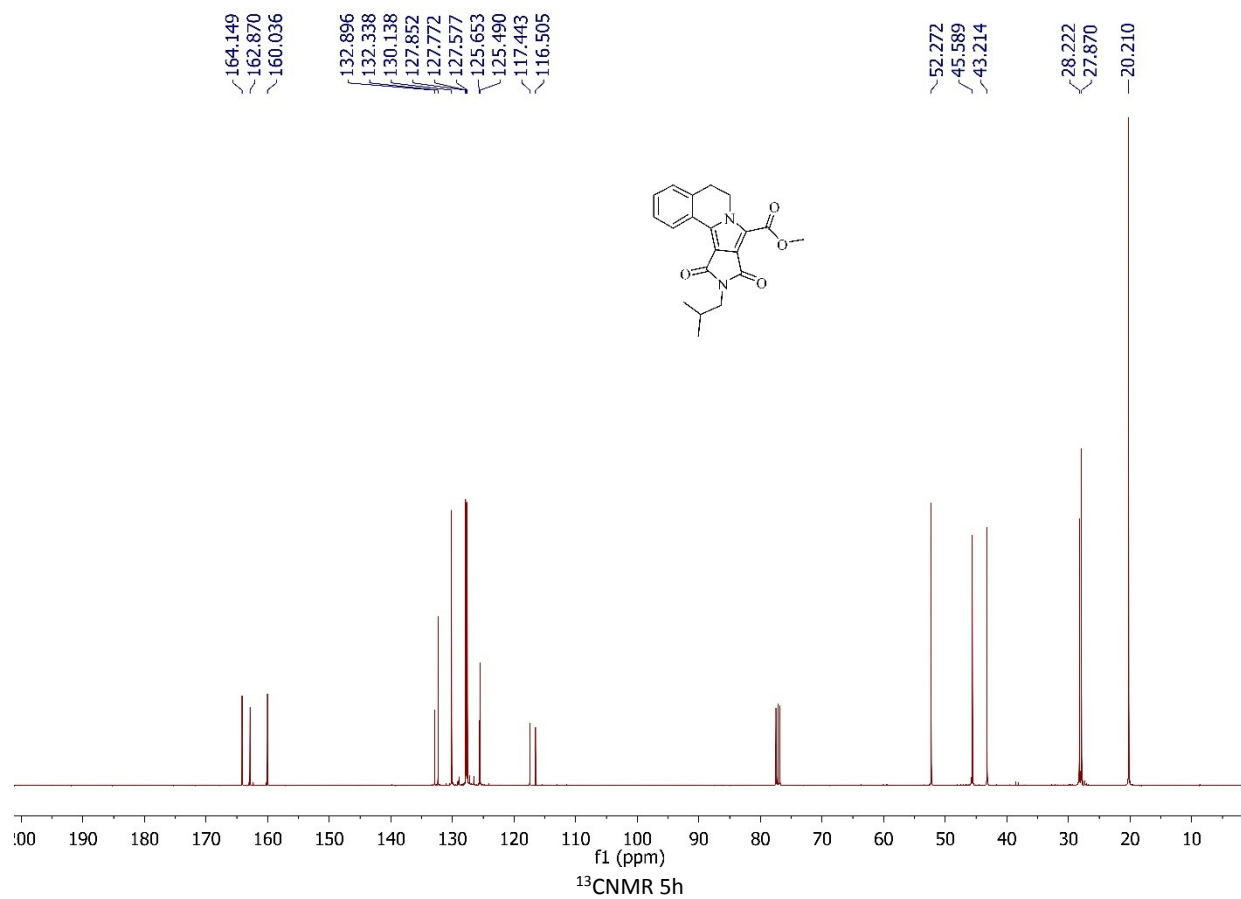

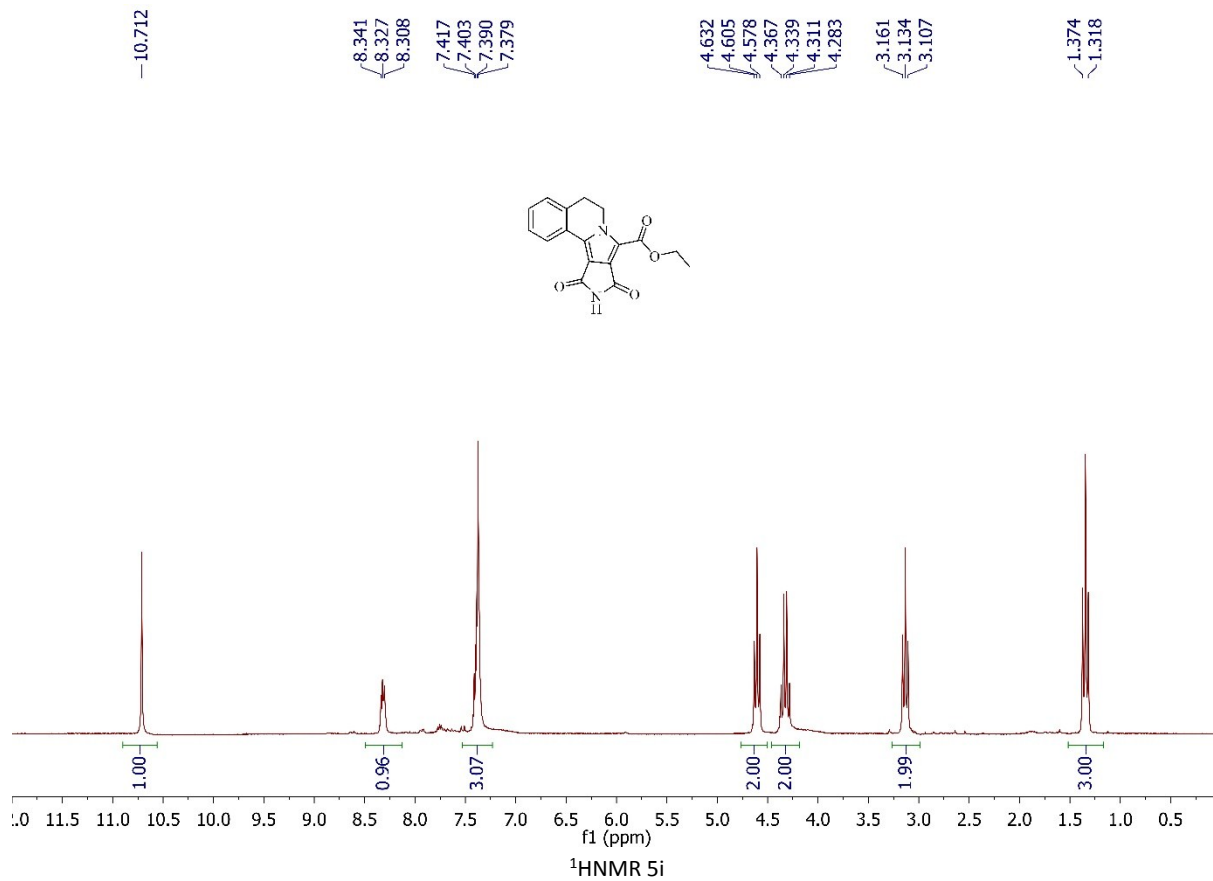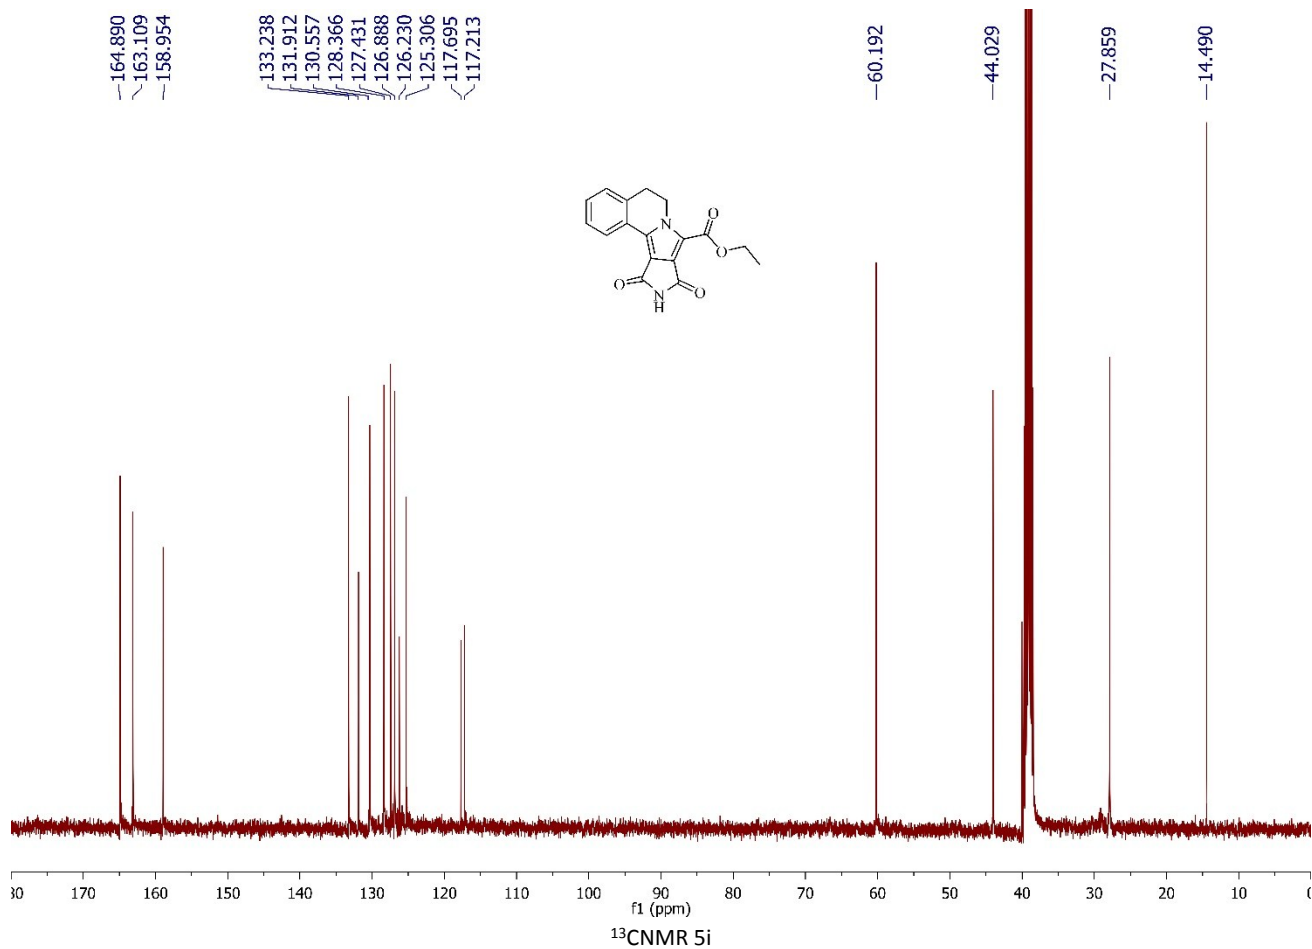

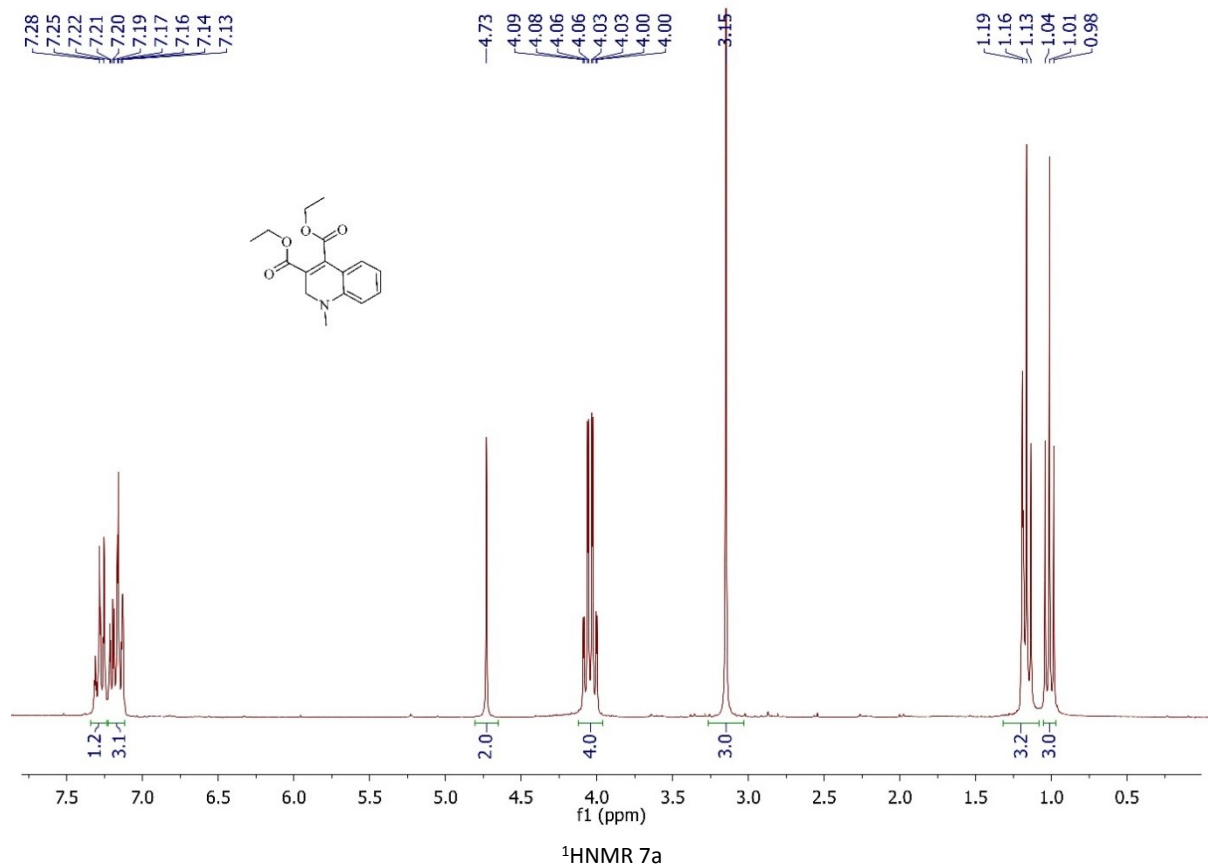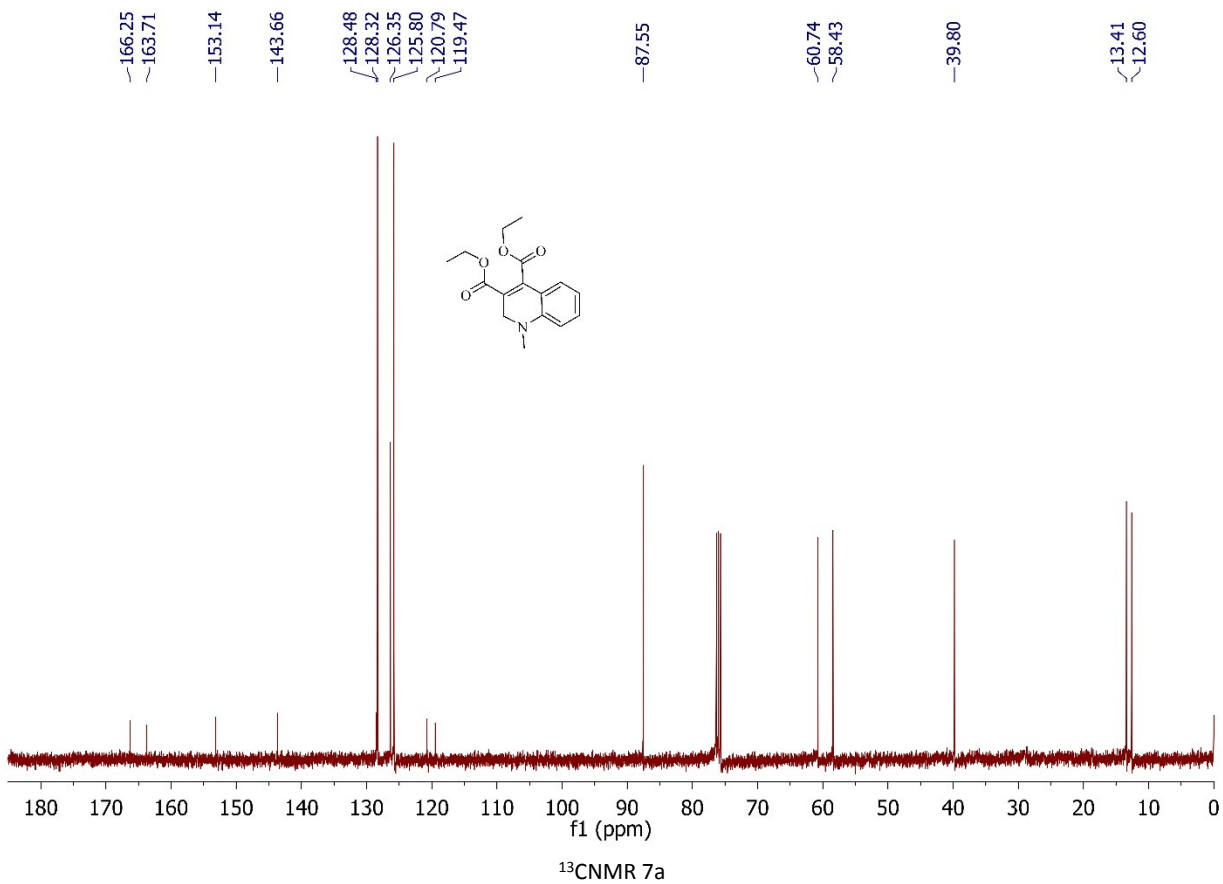



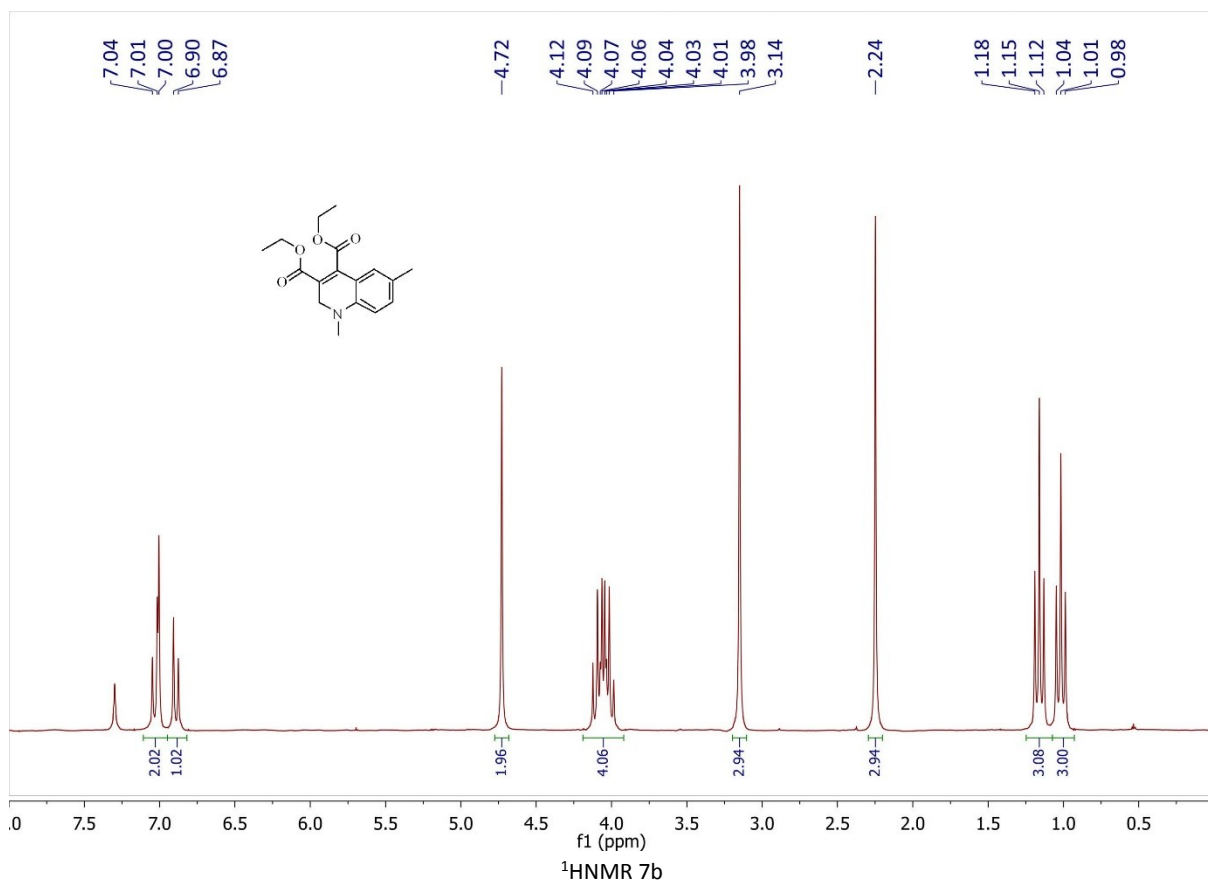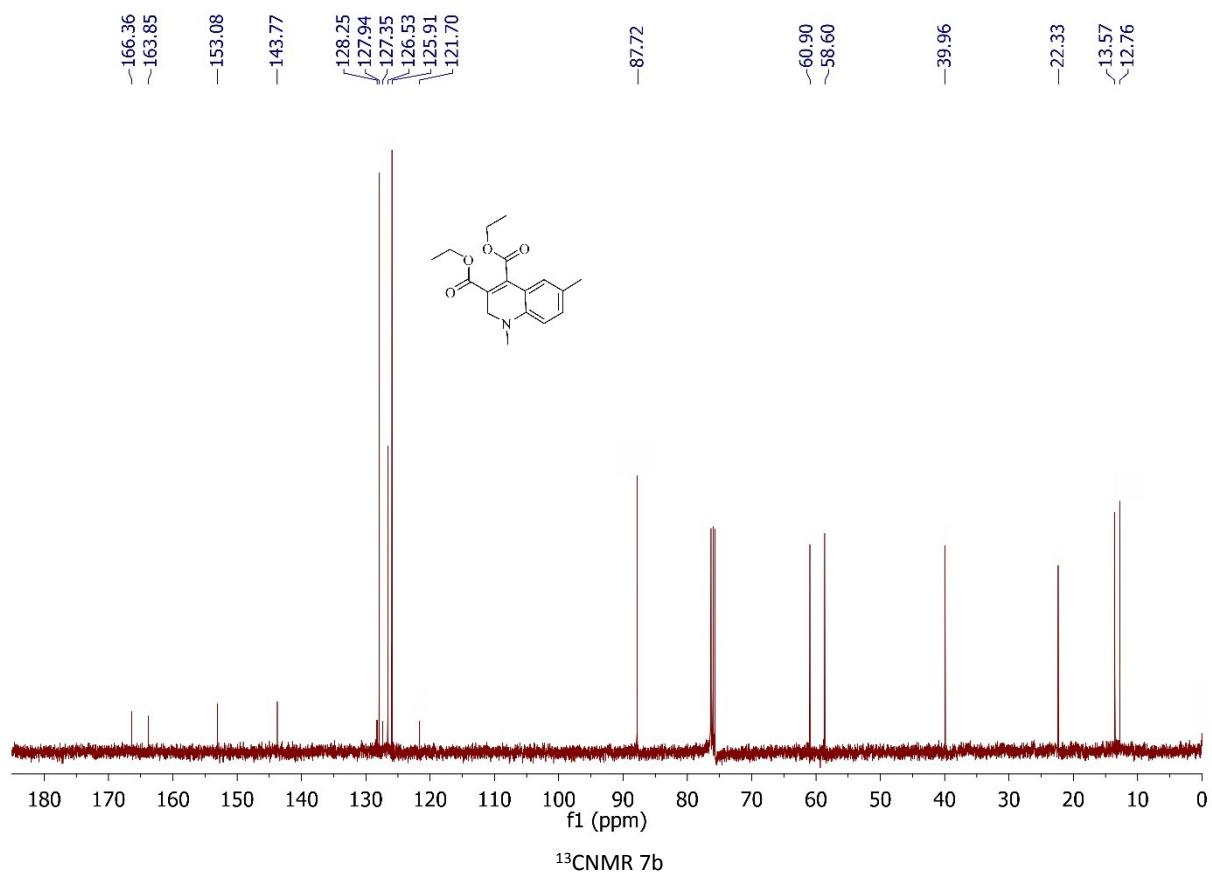

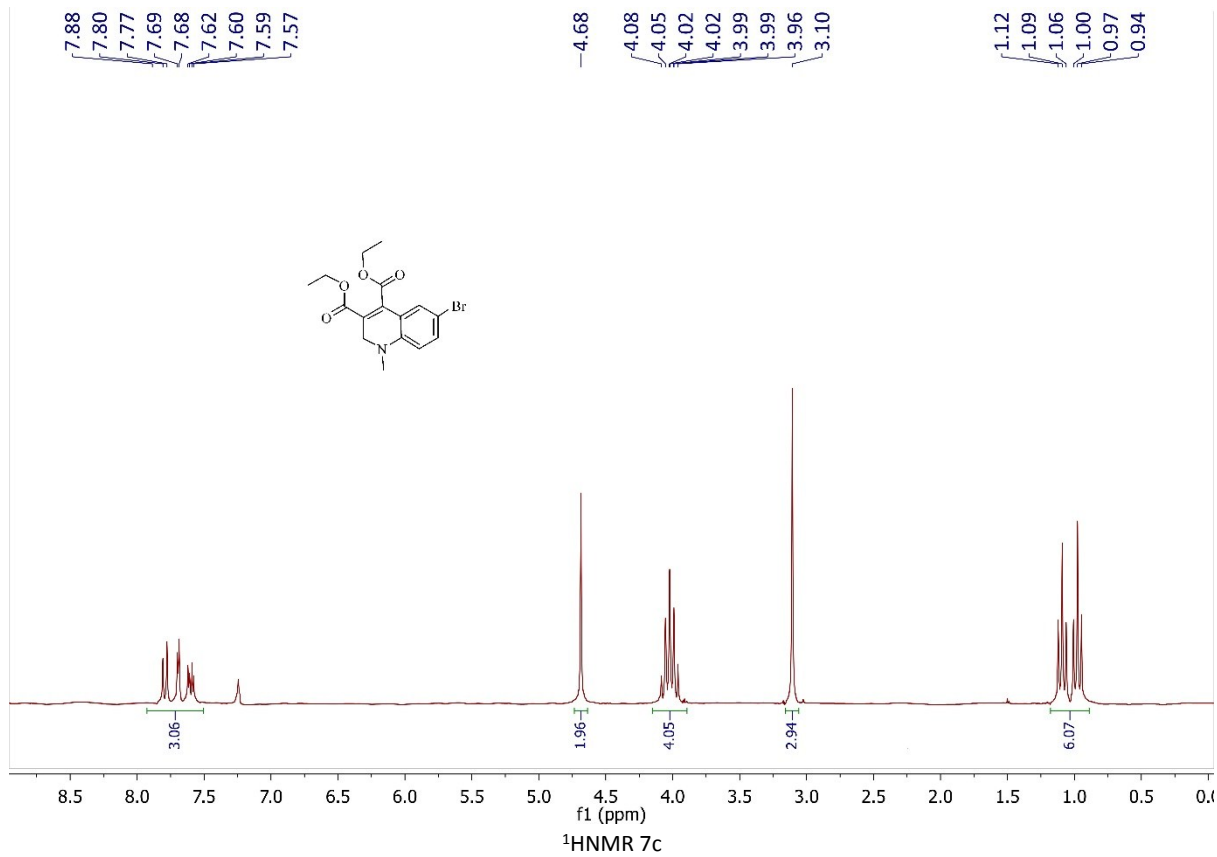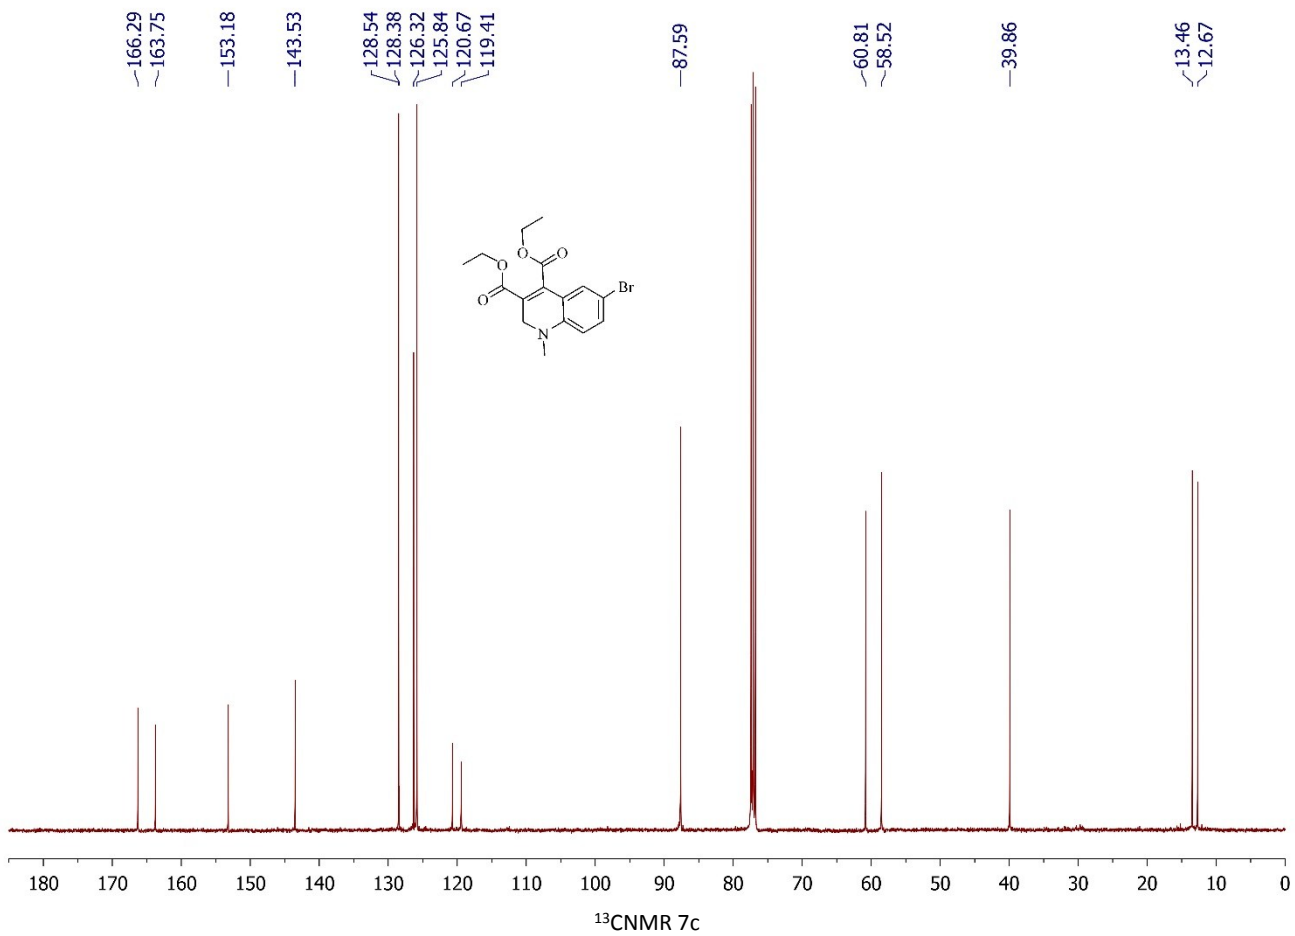

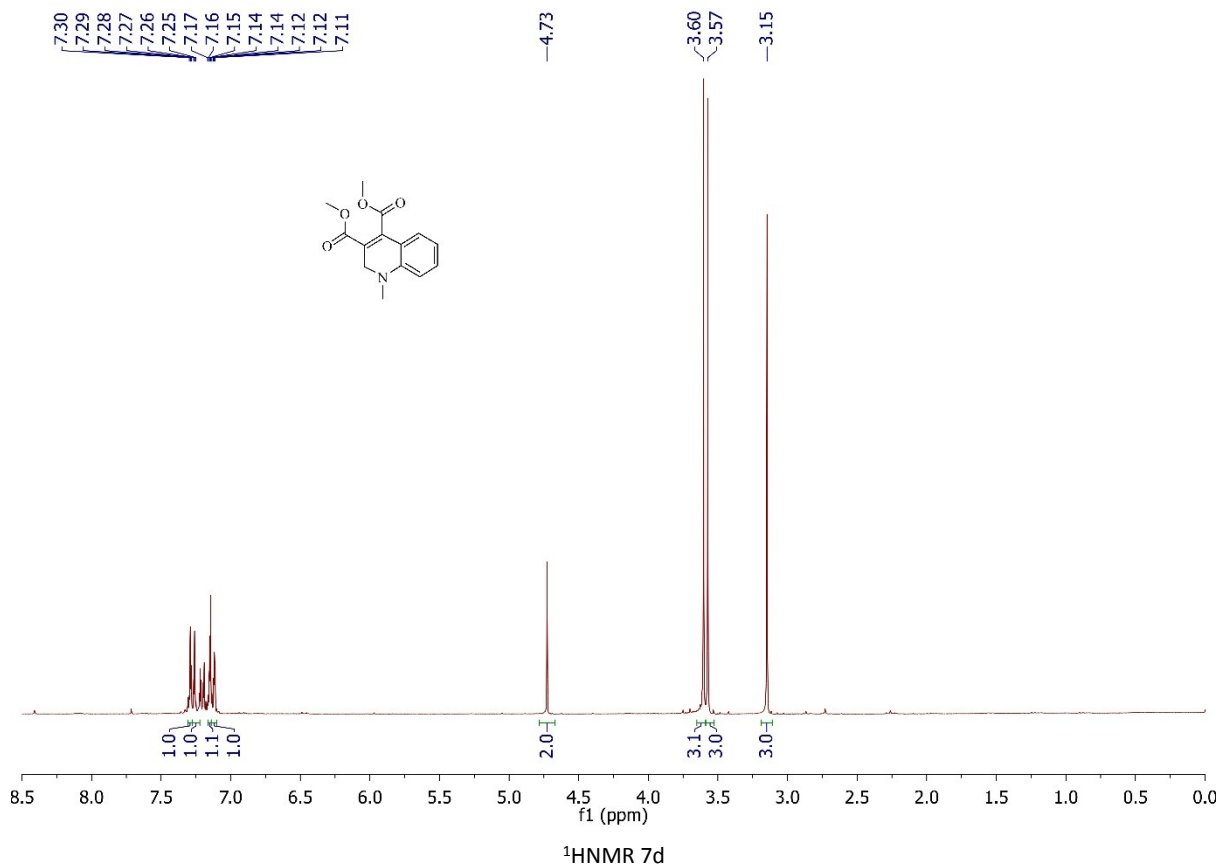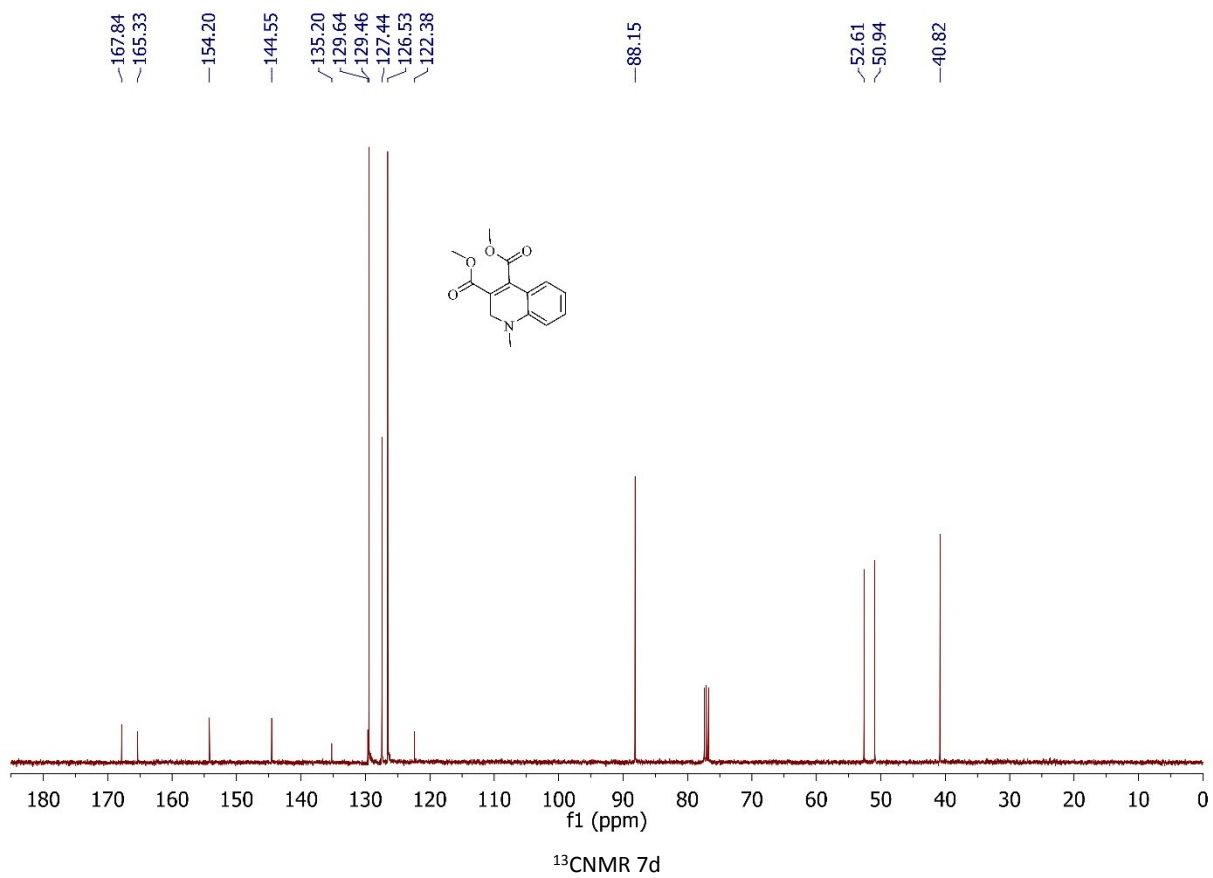

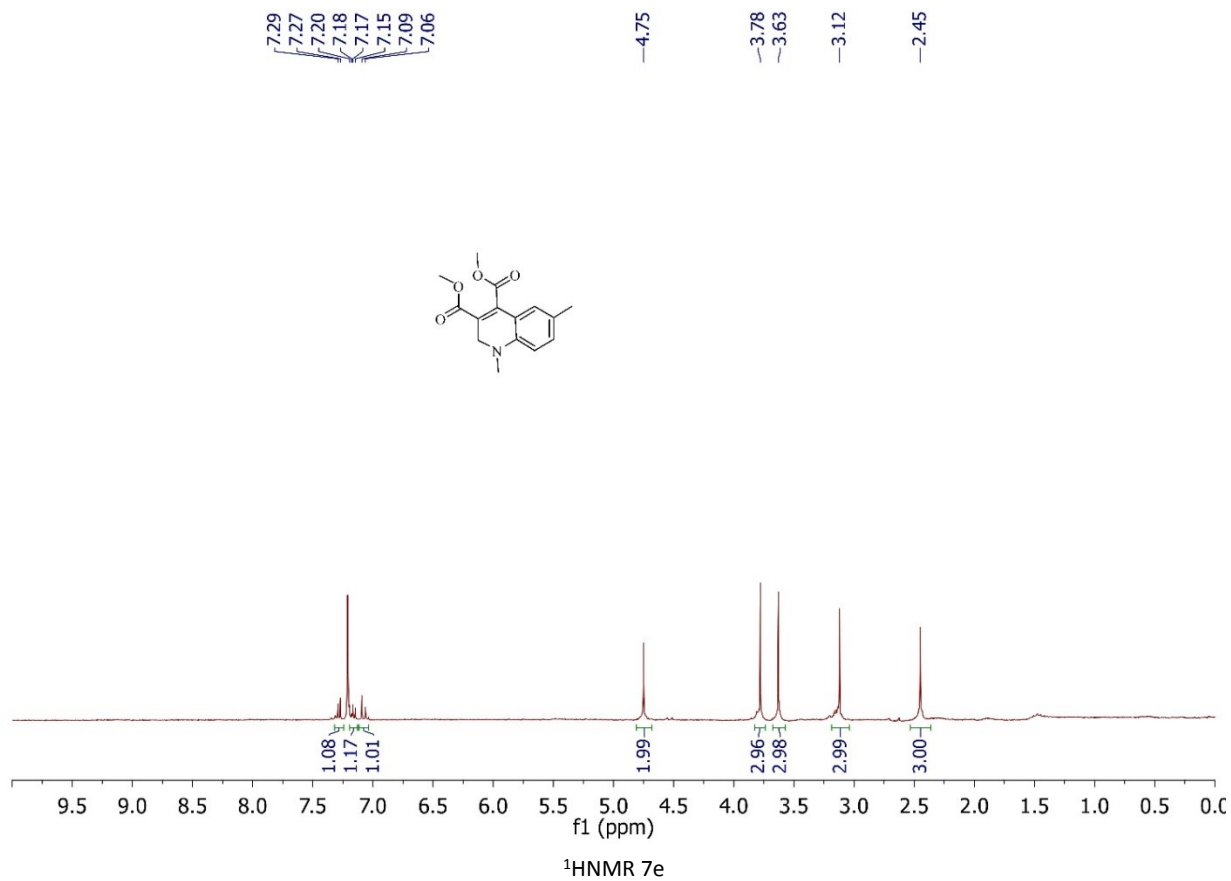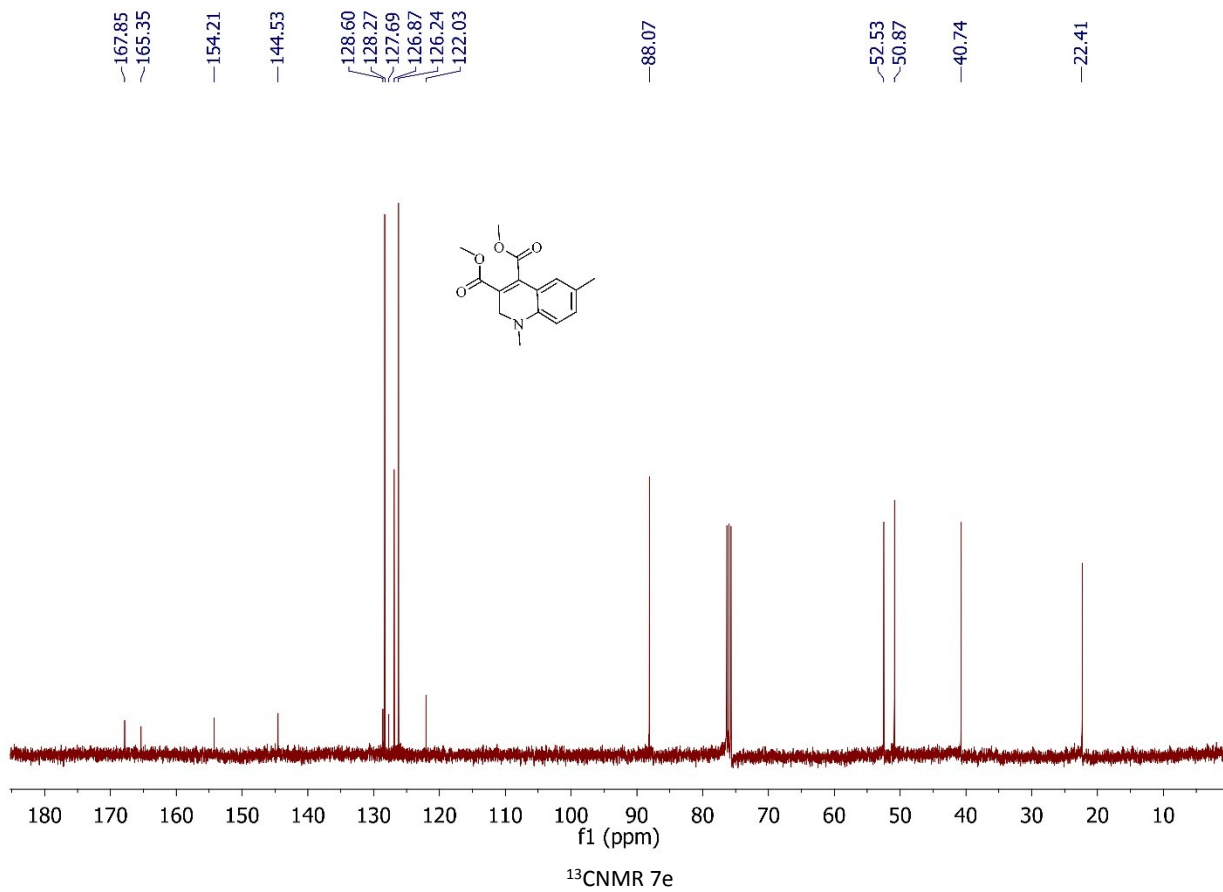

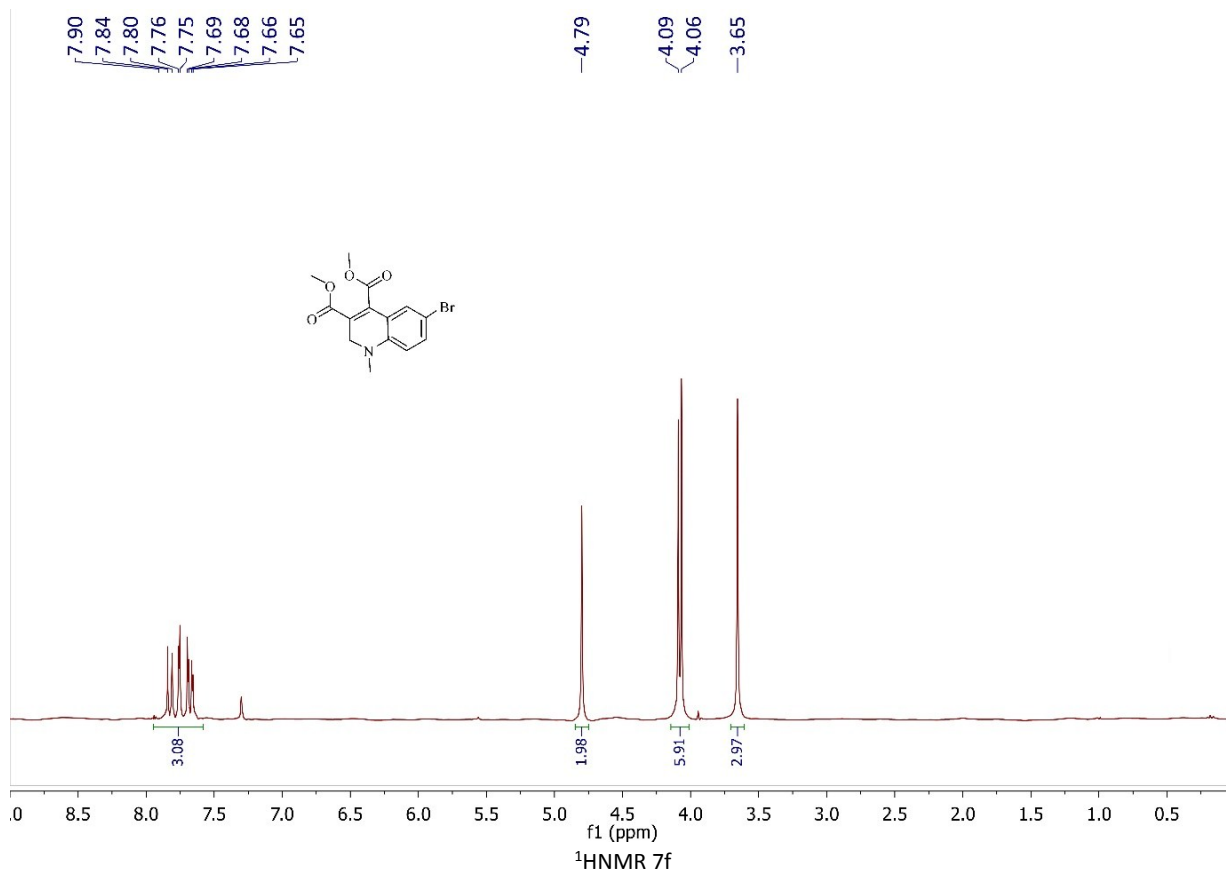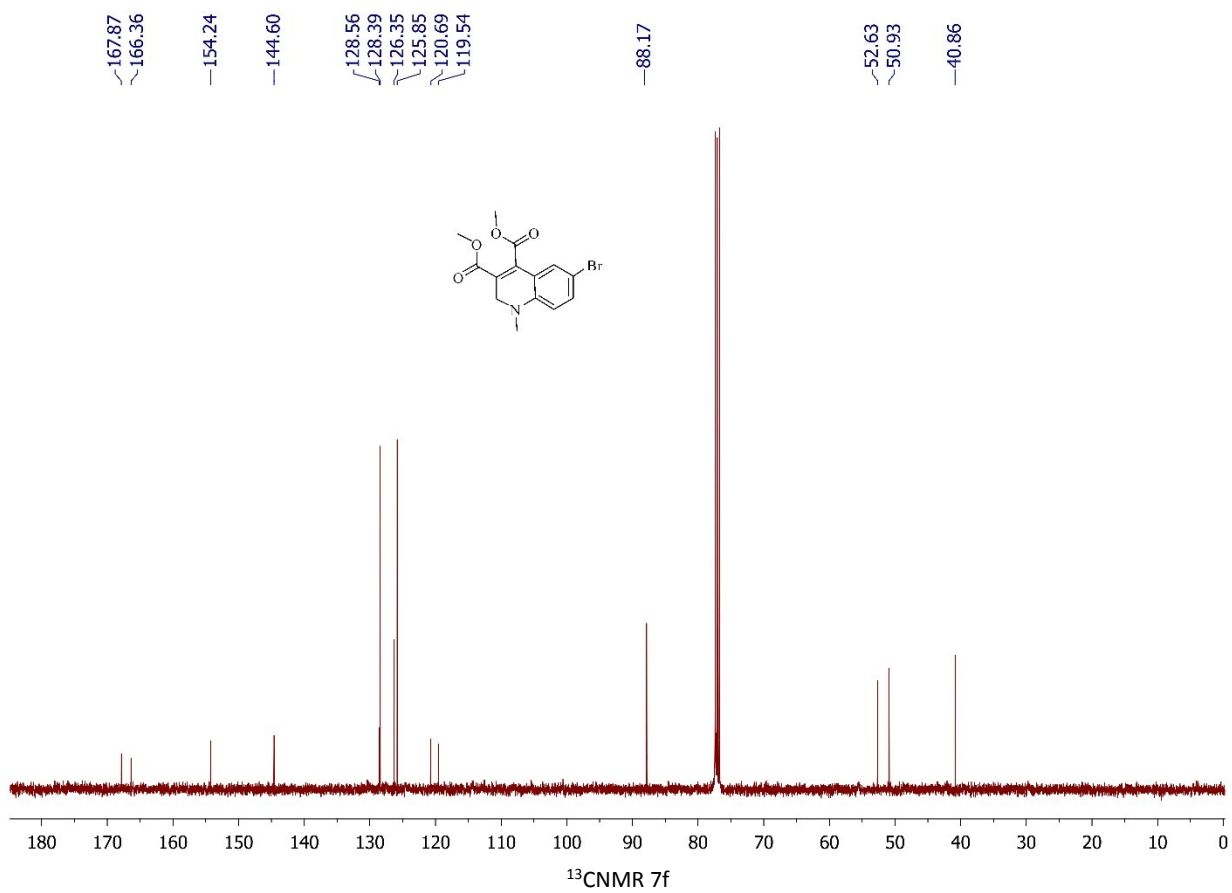

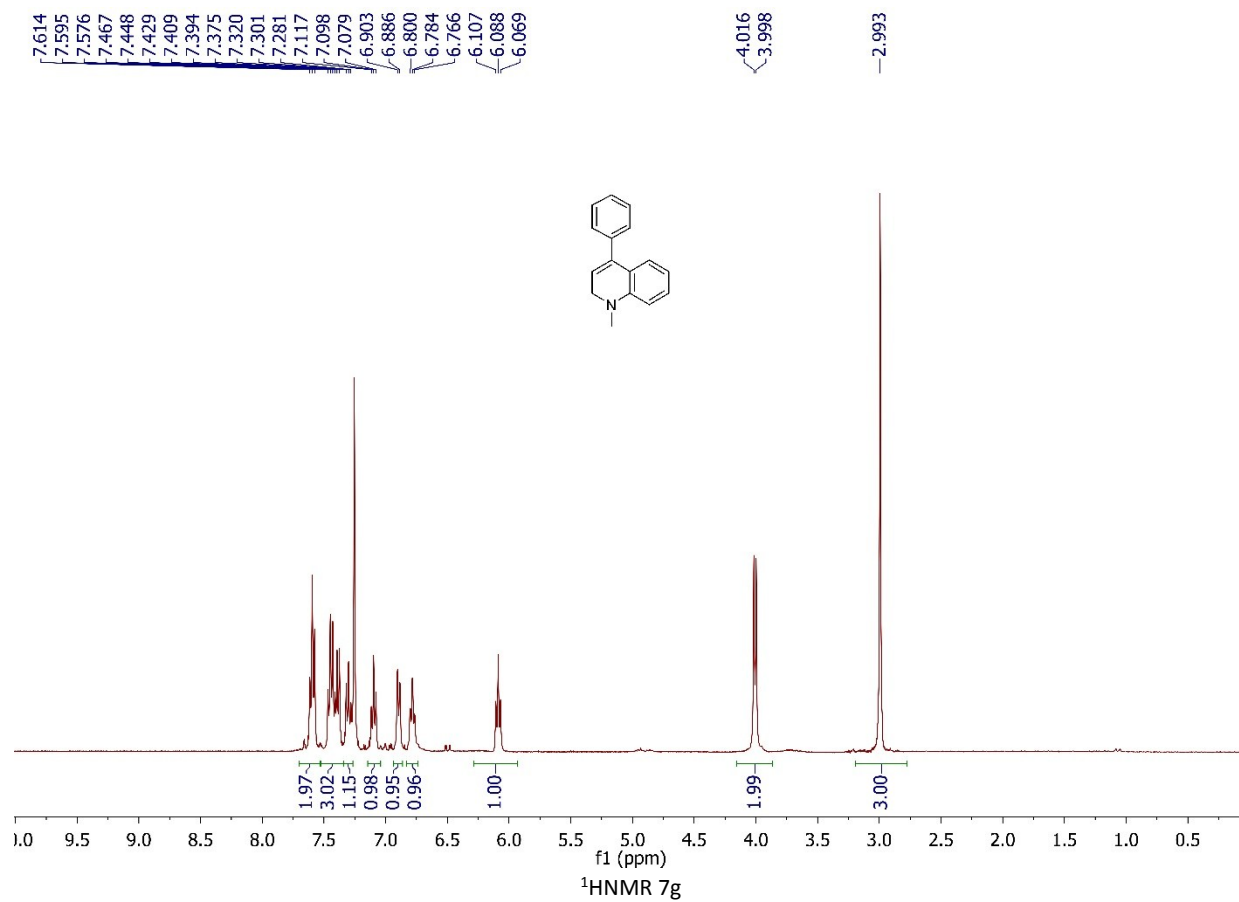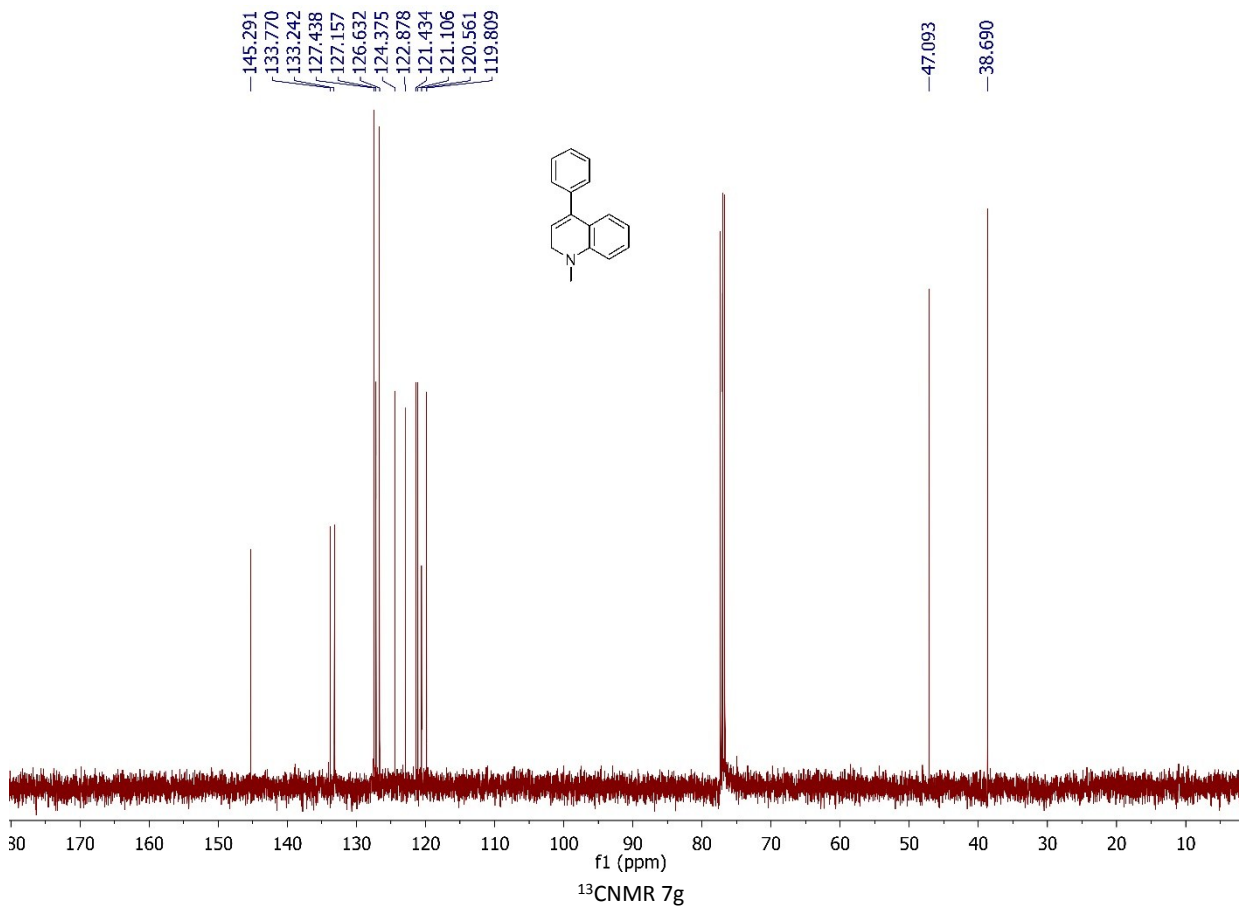

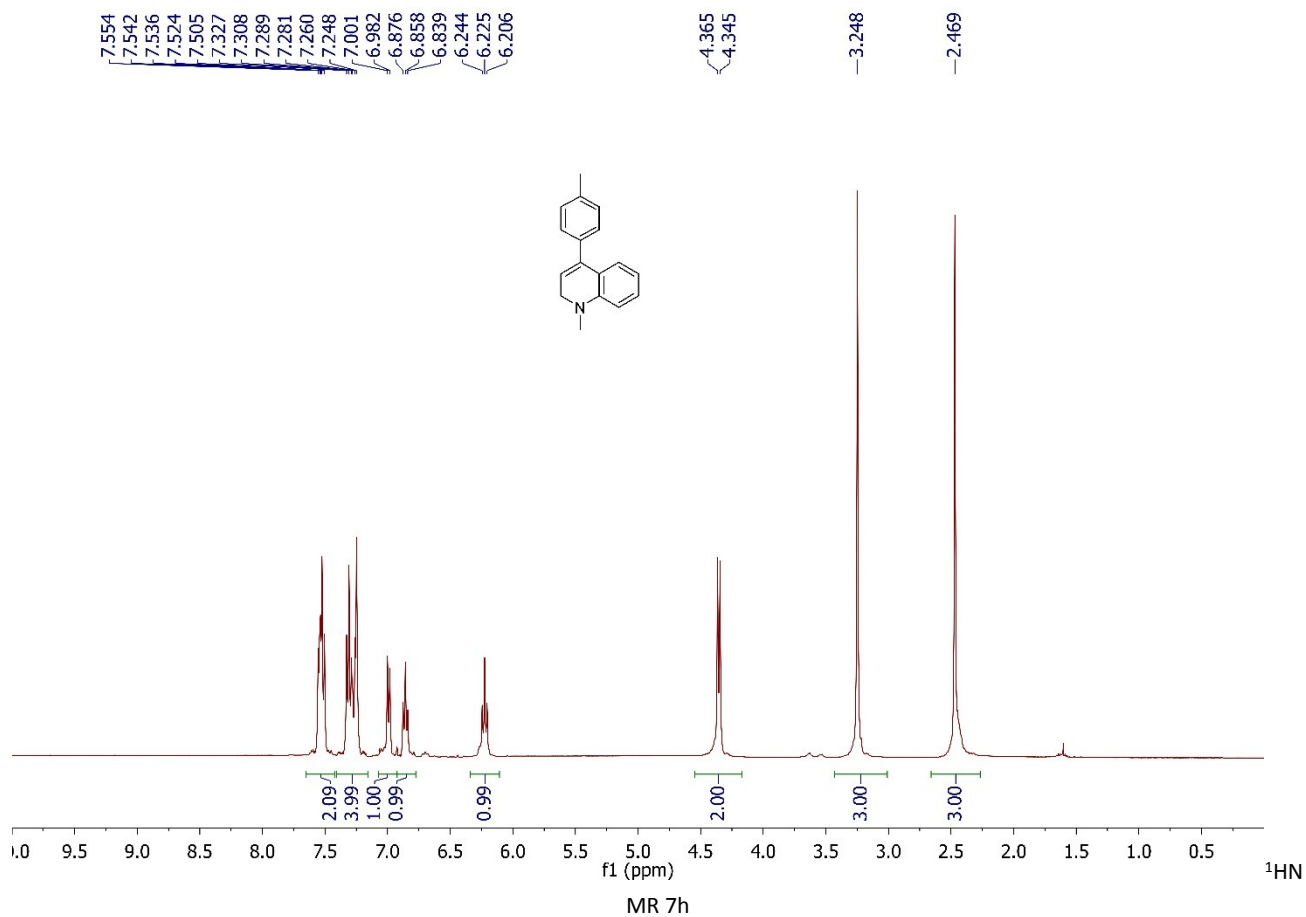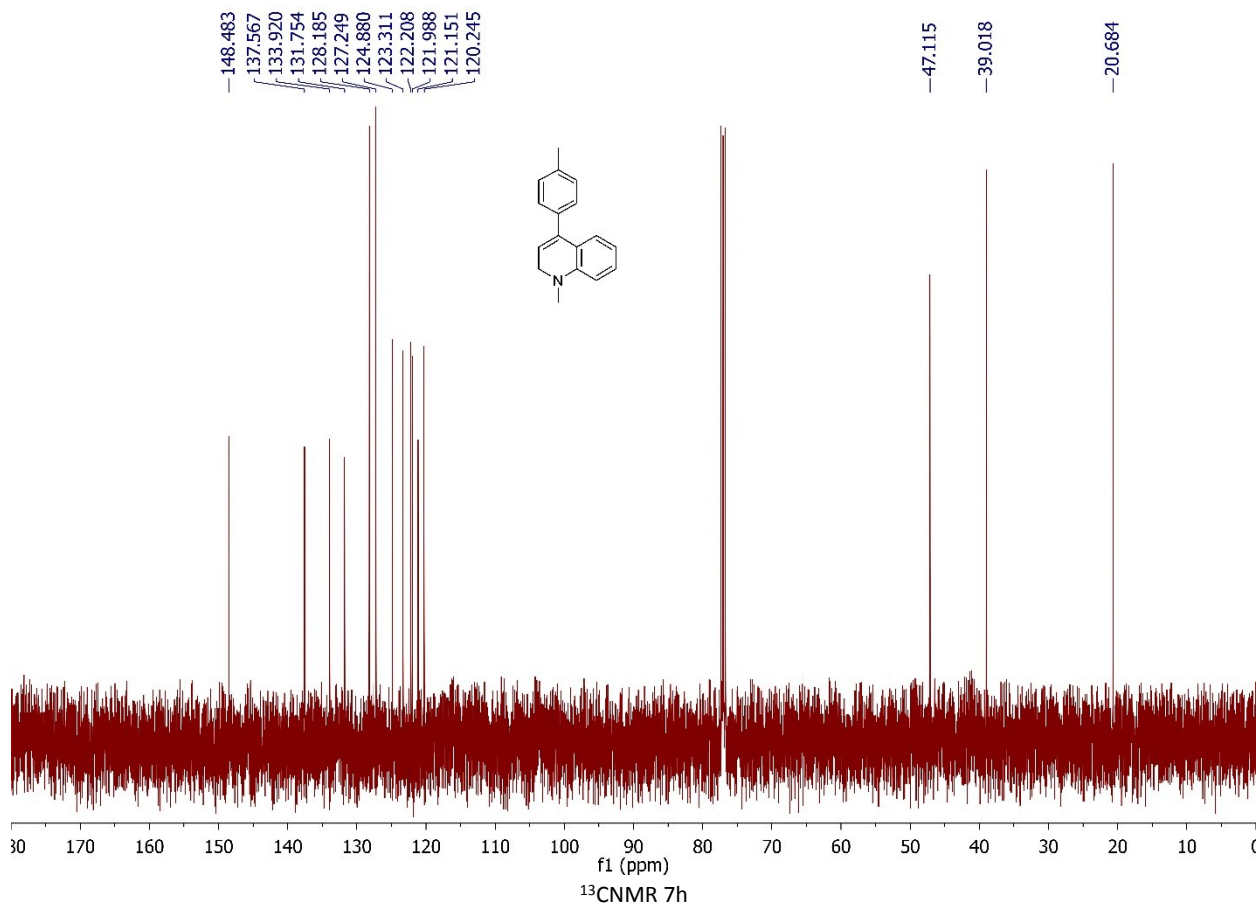

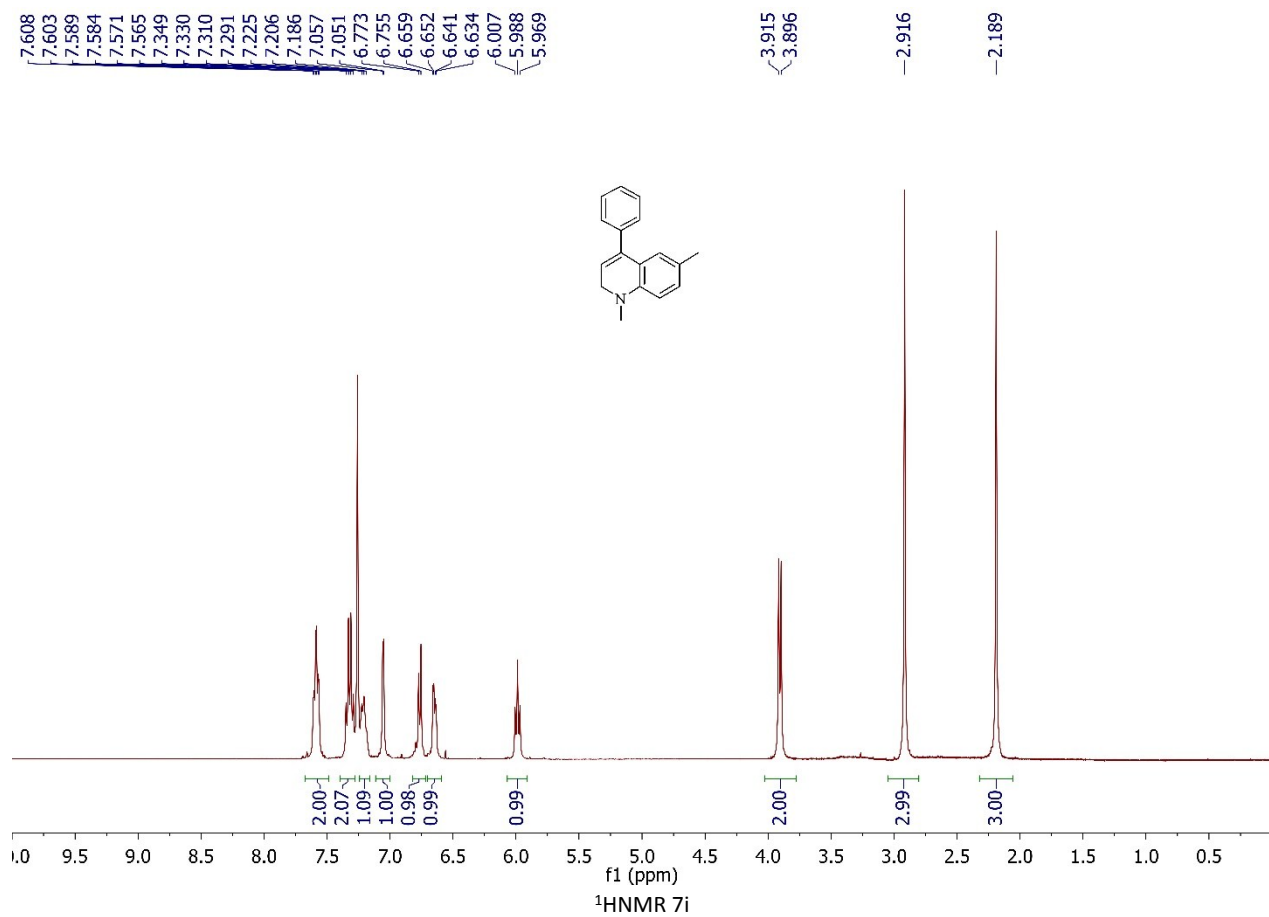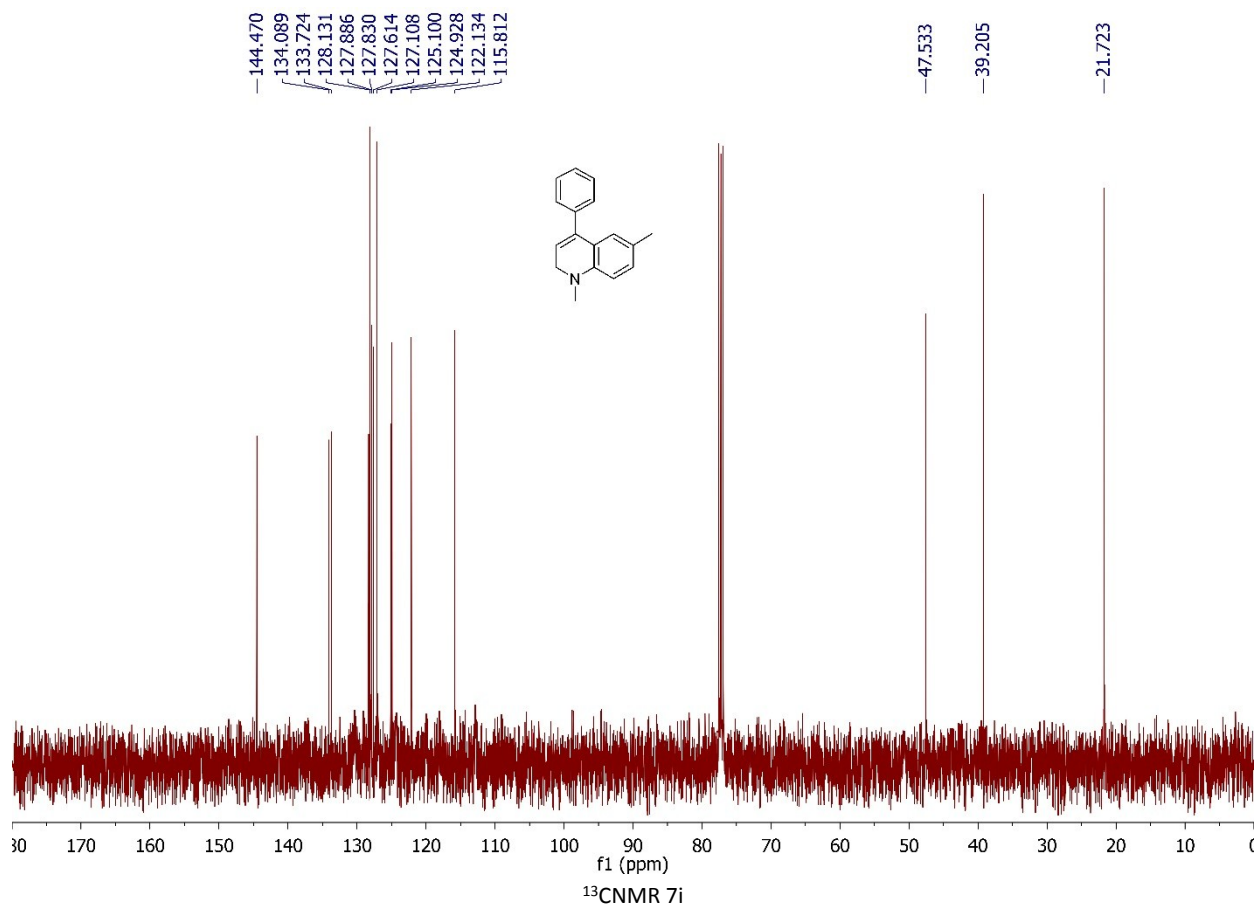



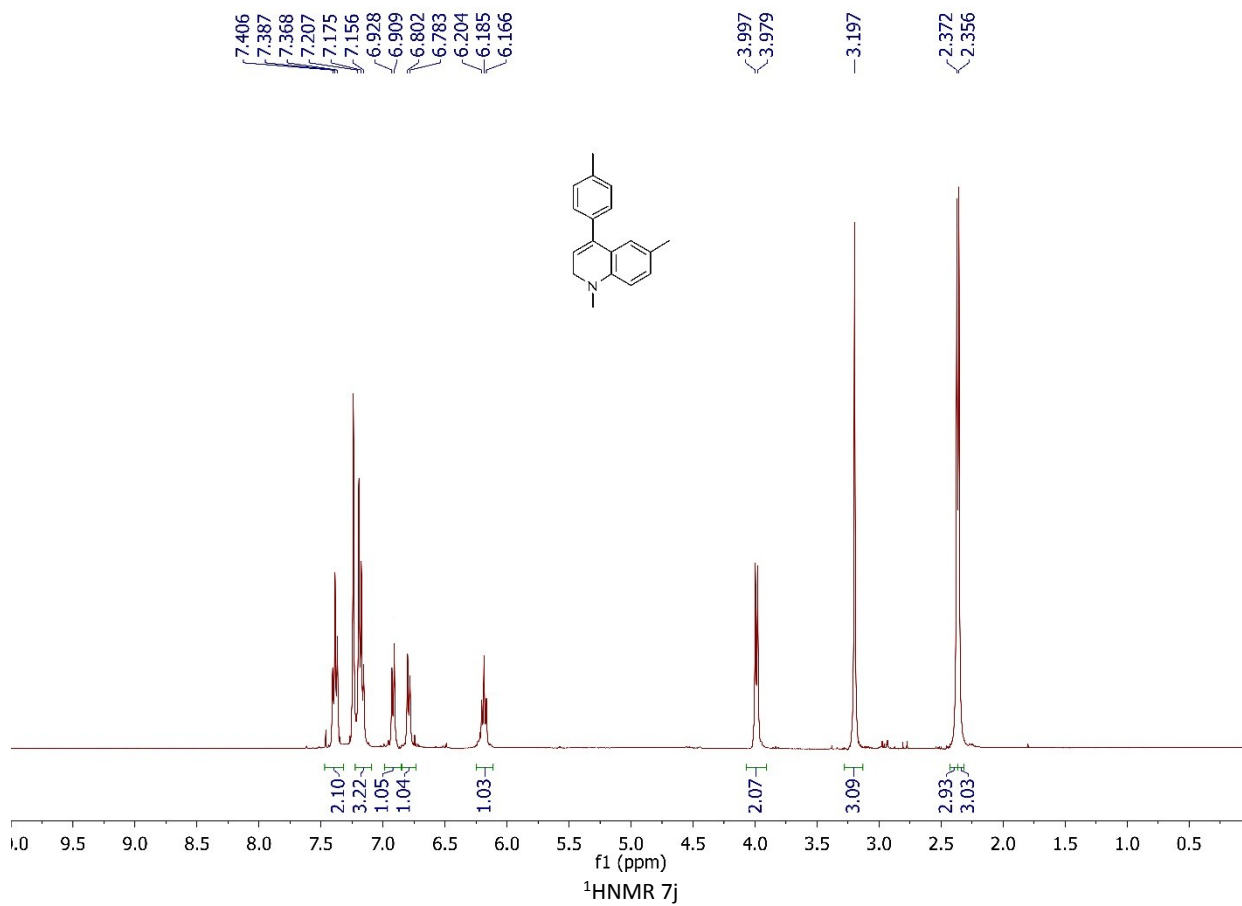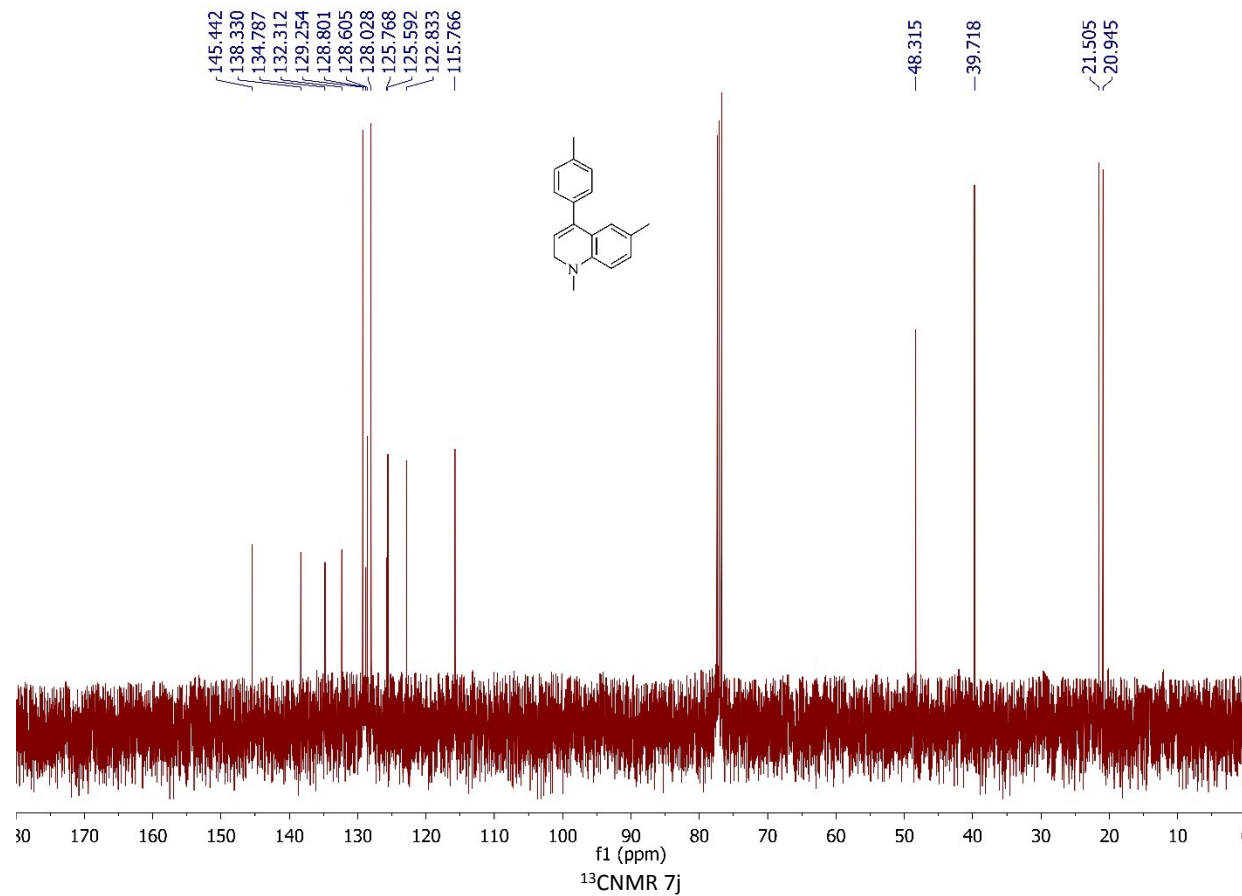

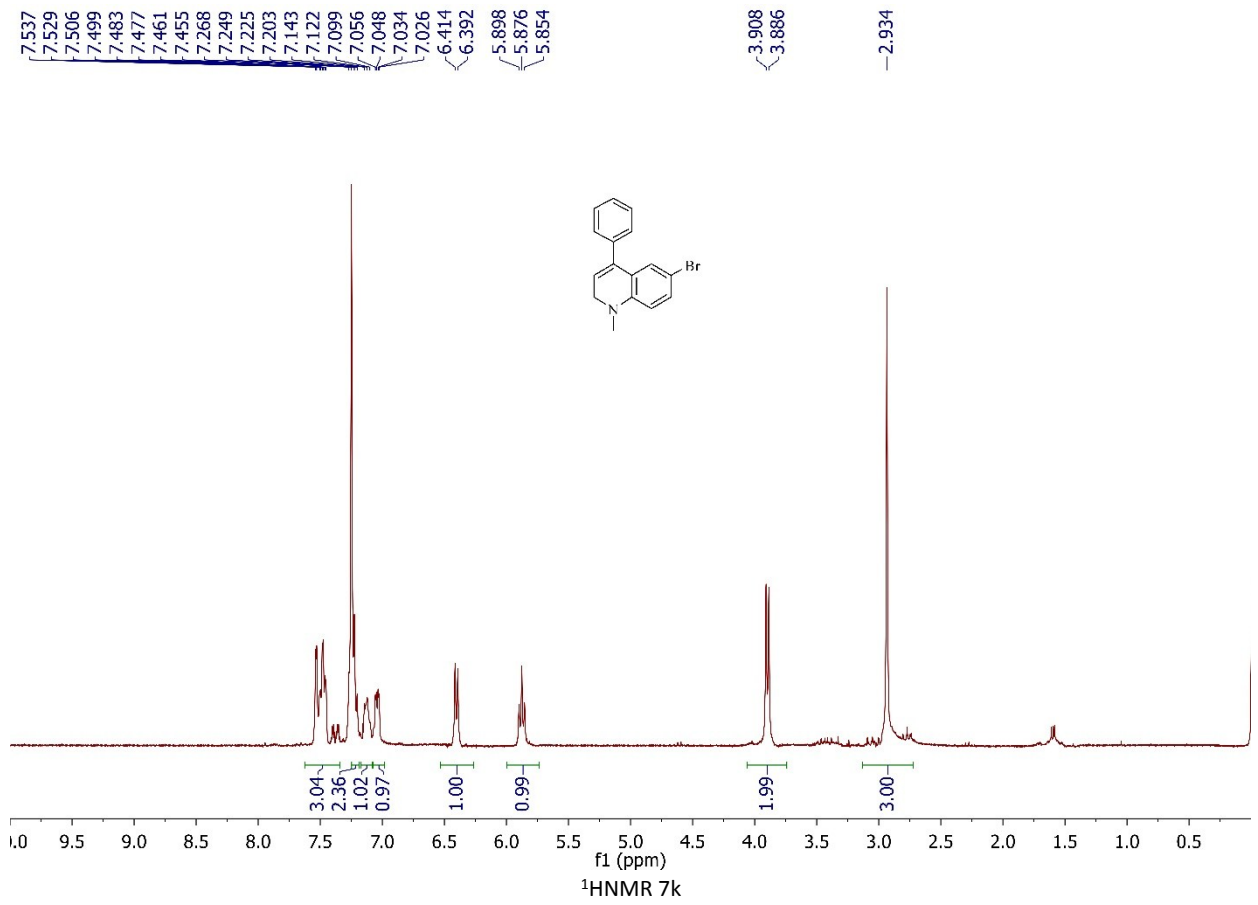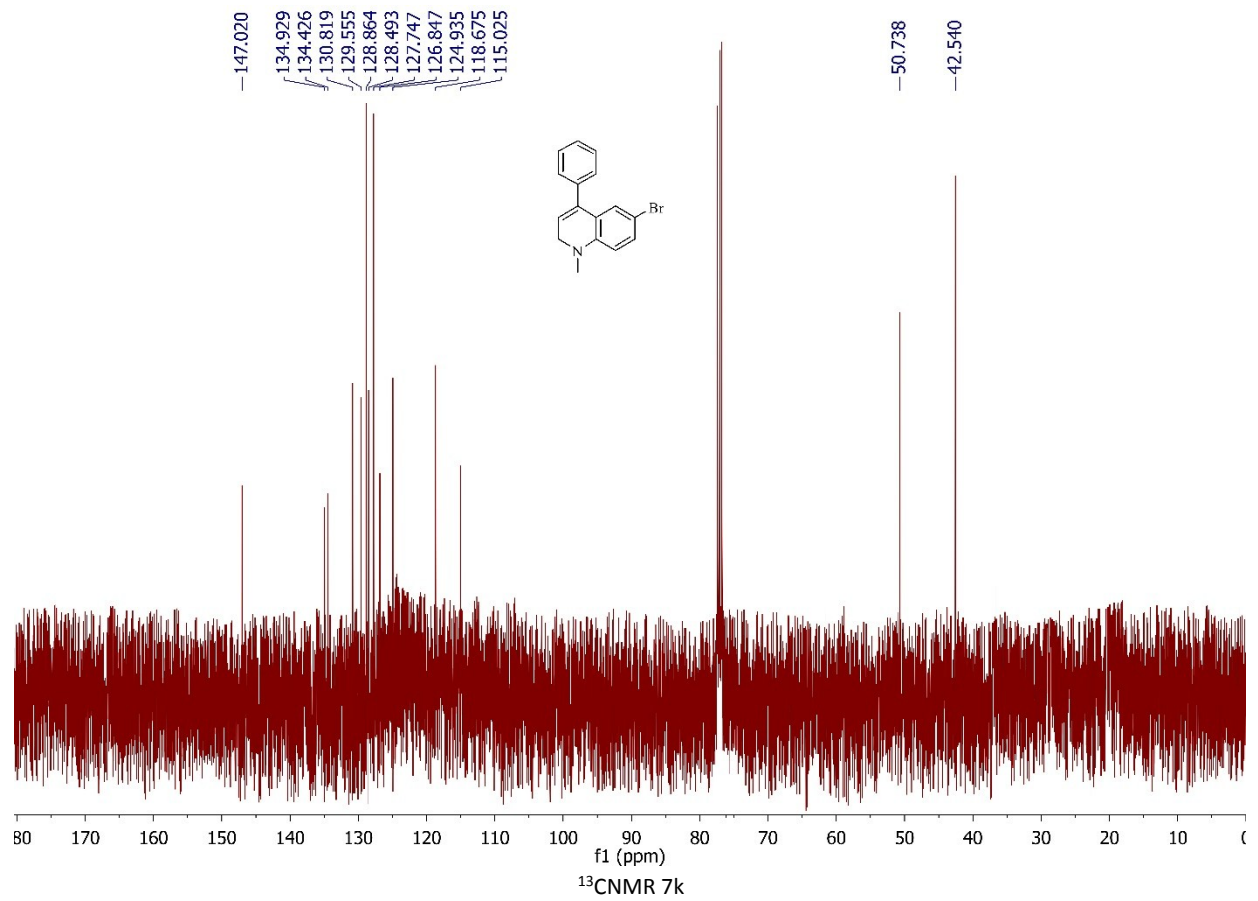

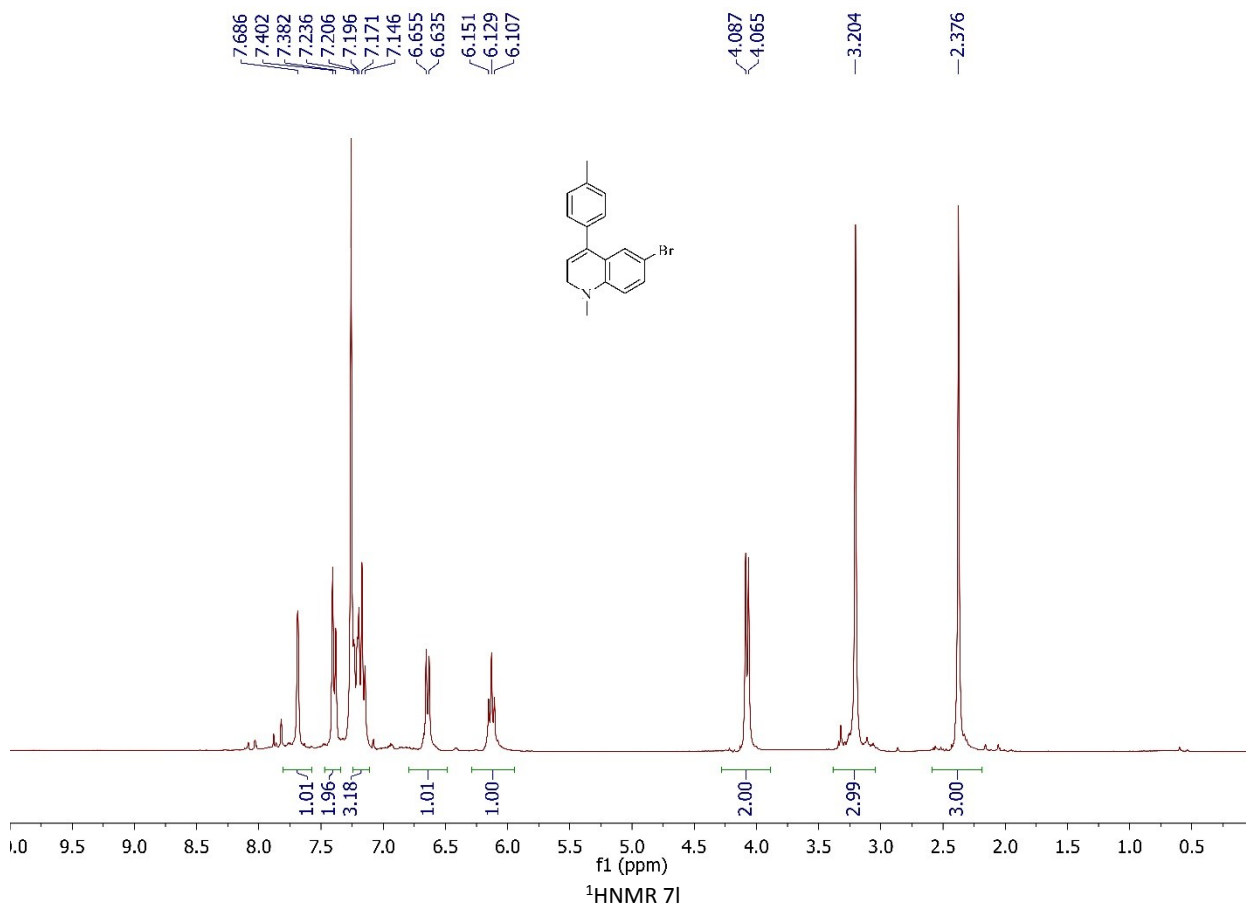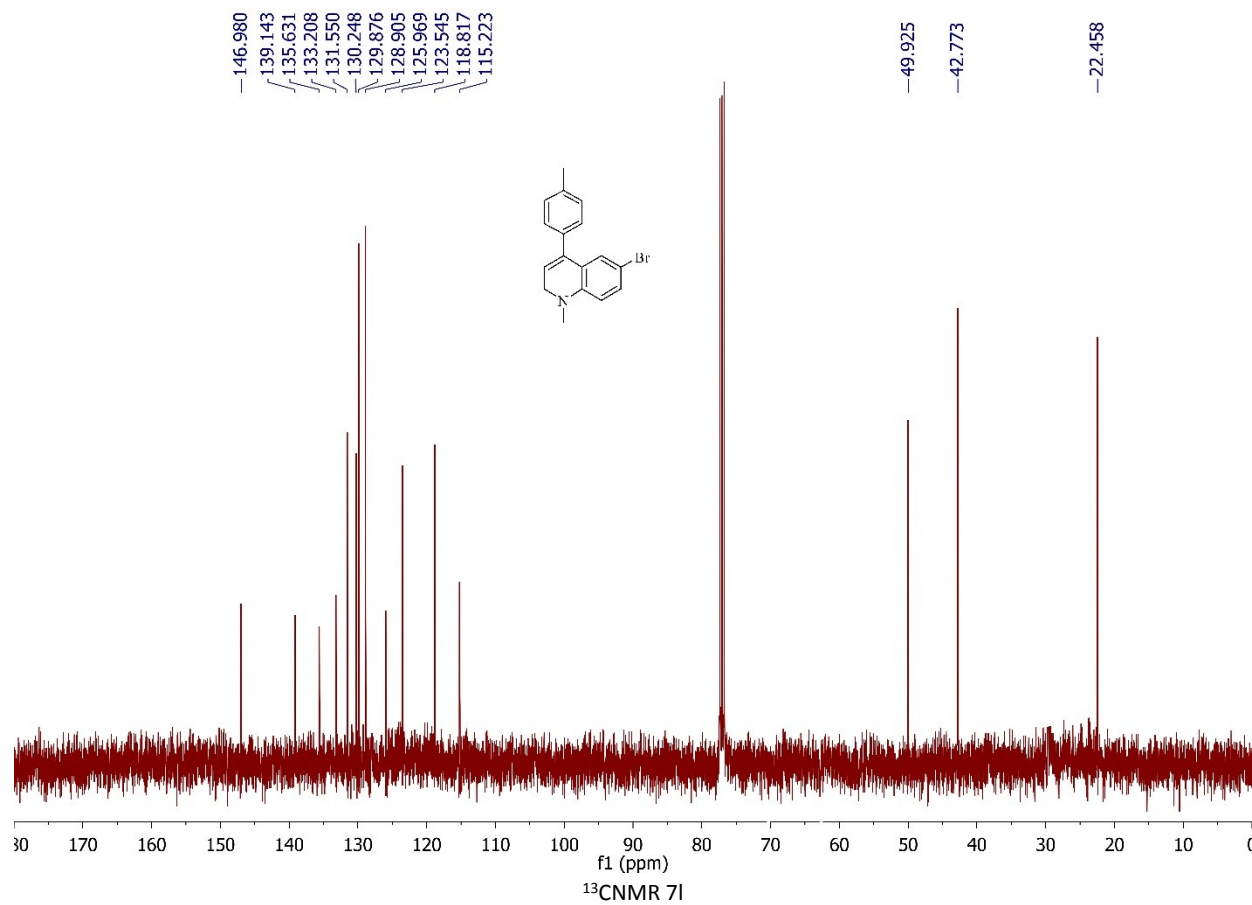

## 7. References

1. N. Matuszak, G. G. Muccioli, G. Labar, D. M. Lambert, *J. med. chem*, 2009, **52**, 7410.
2. M. Sortino, F. Garibotto, V. Cechinel Filho, M. Gupta, R. Enriz, S. Zacchino, *Bioorg. Med. chem*, 2011, **19**, 2823.
3. X. Ju, D. Li, W. Li, W. Yu, F. Bian, *Adv. Syn. Cat*, 2012, **354**, 3561.
4. J. Tang, G. Grampp, Y. Liu, B.-X. Wang, F.-F. Tao, L.-J. Wang, X.-Z. Liang, 7. H.-Q. Xiao, Y.-M. Shen, *J. org. chem*, 2015, **80**, 2724.
5. M. Hosseini-Sarvari, M. Koohgard, S. Firoozi, A. Mohajeri, H. Tavakolian, *New J. Chem*, 2018, **42**, 6880.
6. Z. Liang, S. Xu, W. Tian, R. Zhang, *Beilstein j. org. chem*, 2015, **11**, 425.
7. J.-T. Guo, D.-C. Yang, Z. Guan, Y.-H. He, *J. Org. Chem*, 2017, **82**, 1888.
8. H. M. Huang, F. Huang, Y. J. Li, J. H. Jia, Q. Ye, L. Han, J. R. Gao, *RSC Adv*, 2014, **4**, 27250.
